# Supplementary material for: Assessing the oxygen reduction reaction by a 2-electron mechanism on ceria surfaces
Source: Royal Society of Chemistry journal article supplement (doi:10.1039/d1cp03007h), 2021-01-01
Supplement: d1cp03007h5.pdf [file d1cp03007h5.pdf]

## Assessing the Oxygen Reduction Reaction by a 2-electron Mechanism on Ceria Surfaces

Lanna E. B. Lucchetti <sup>(1)</sup>, James M. de Almeida<sup>(2)</sup>,

Pedro A. S. Autreto<sup>(2)</sup>, Mauro C. Santos <sup>(1\*)</sup>

*<sup>1</sup>Laboratório de Eletroquímica e Materiais Nanoestruturados (LEMN) – Centro de Ciências Naturais e Humanas (CCNH), Universidade Federal do ABC (UFABC). Rua Santa Adélia 166, Bairro Bangu, 09210-170, Santo André - SP, Brazil.*

*<sup>2</sup> Centro de Ciências Naturais e Humanas (CCNH), Universidade Federal do ABC (UFABC). Rua Santa Adélia 166, Bairro Bangu, 09210-170, Santo André - SP, Brazil.*

**Corresponding author:** \*M.C. Santos

**E-mail:** mauro.santos@ufabc.edu.br

**Tel.:** +55 11 4996 016

|                                                         |   |
|---------------------------------------------------------|---|
| 1. Vacuum Layer Convergence Test for Surface Slabs..... | 3 |
| 2. Unstable Sites for Hydrogen Peroxide Molecule.....   | 4 |
| 3. Density of States (DOS).....                         | 5 |
| 4. Structures Atomic Coordinates.....                   | 6 |

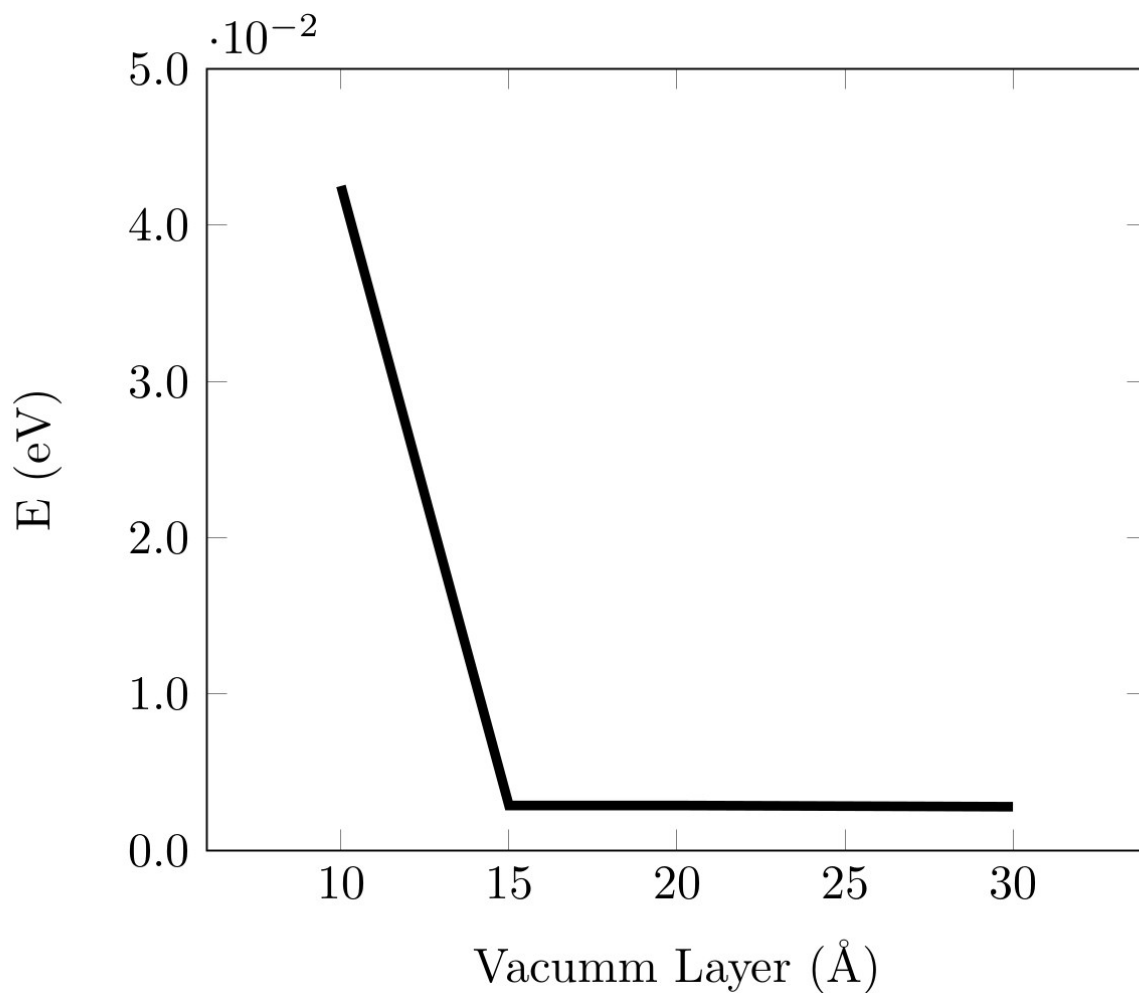

Figure S1: Vacuum layer convergence test regarding the adsorption energy variation of intermediate species (\*OOH) over the ceria surface.

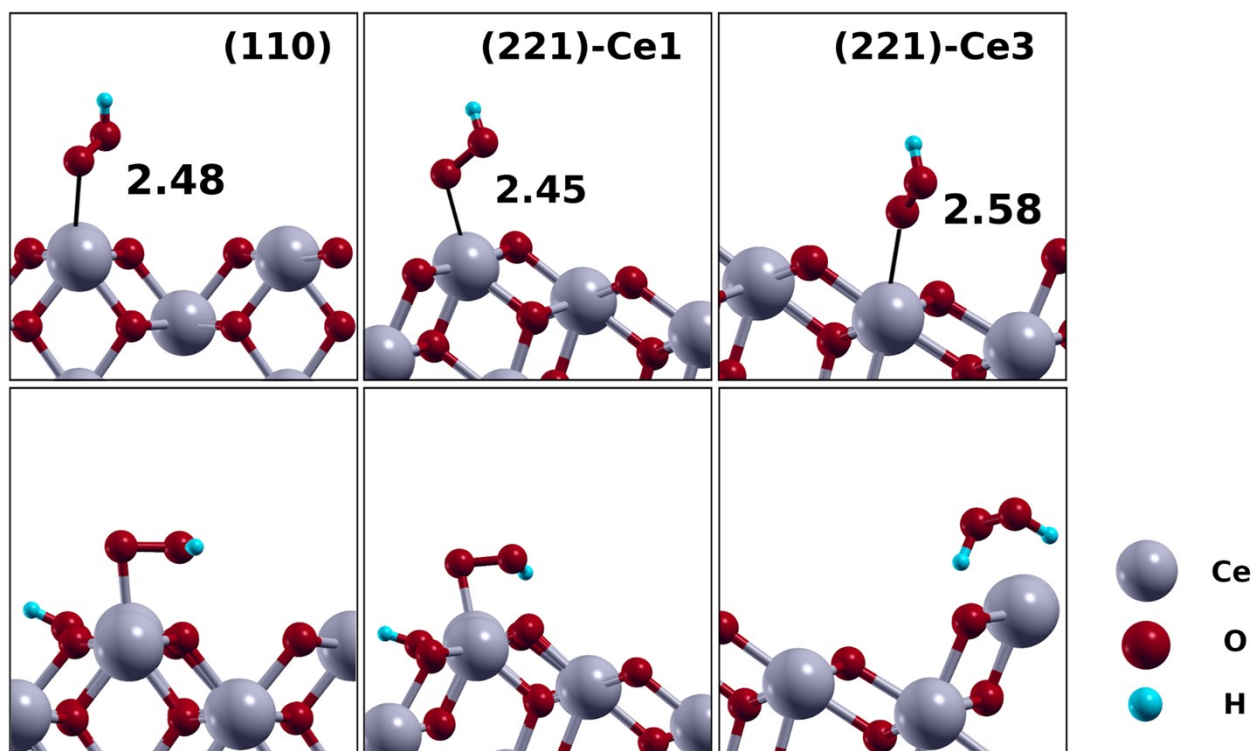

Figure S2: Unstable sites for hydrogen peroxide molecule, along with intermediate reaction step ( $\text{*OOH}$ ). Following the order of the columns, from left to right: (110), where the molecule breaks into  $\text{*OOH} + \text{*H}$ , (221)-Ce1, where the molecule breaks into  $\text{*OOH} + \text{*H}$ , (221)-Ce3, where the molecule migrates over the surface to another site.

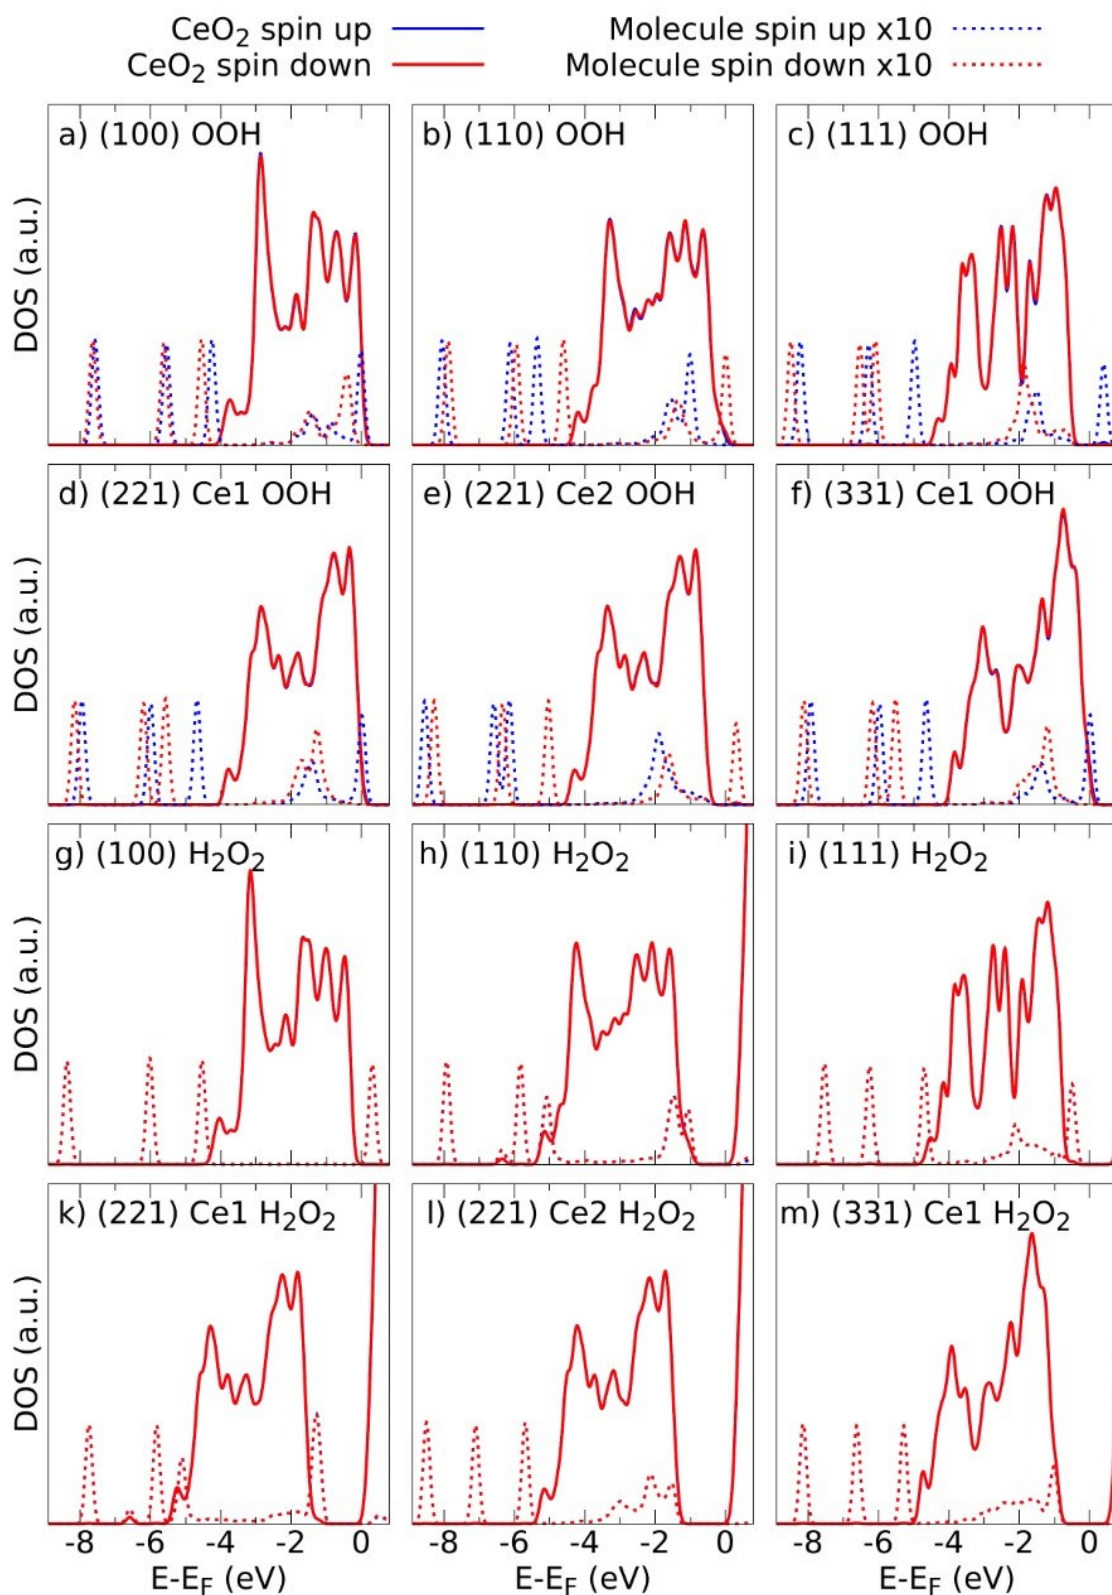

Figure S3: Density of States (DOS) of selected ceria surfaces and sites with adsorbed species \*OOH and H<sub>2</sub>O<sub>2</sub>. For better visualization, molecular species contributions have been magnified by twenty times. The surface DOS were normalized to account for the different number of atoms in each case.

## Structures Optimized Atomic Coordinates

### 100-OOH

|    |               |               |               |
|----|---------------|---------------|---------------|
| Ce | 2.7500769090  | 0.0000000000  | 1.7734174790  |
| Ce | 2.7500769090  | 5.5001538170  | 1.7734174790  |
| Ce | 8.2502307260  | 0.0000000000  | 1.7734174790  |
| Ce | 8.2502307260  | 5.5001538170  | 1.7734174790  |
| Ce | 10.9922608510 | 2.7405087640  | 23.4031887210 |
| Ce | 10.9917314470 | 8.2407709680  | 23.4012728380 |
| Ce | 5.4925138900  | 2.7487589540  | 23.4141600240 |
| Ce | 5.4923075280  | 8.2299139490  | 23.4142010500 |
| Ce | 2.7419471620  | 10.9908262210 | 23.4031542280 |
| Ce | 2.7502353940  | 5.4910852160  | 23.4141467880 |
| Ce | 8.2422189370  | 10.9902991190 | 23.4012936390 |
| Ce | 8.2314087730  | 5.4908703880  | 23.4141783580 |
| Ce | 2.7453402990  | 2.7442467440  | 20.6490450170 |
| Ce | 2.7451694650  | 8.2407012250  | 20.6482037250 |
| Ce | 8.2418026330  | 2.7440677710  | 20.6482106720 |
| Ce | 8.2412028180  | 8.2401080160  | 20.6470686940 |
| Ce | 10.9935764460 | 10.9924953630 | 20.6449668250 |
| Ce | 10.9928034560 | 5.4921741730  | 20.6479977880 |
| Ce | 5.4932722280  | 10.9916962040 | 20.6480034560 |
| Ce | 5.4929839090  | 5.4918659440  | 20.6440050610 |
| Ce | 10.9957595780 | 2.7455443210  | 17.8884802900 |
| Ce | 10.9955363470 | 8.2440693250  | 17.8880552250 |
| Ce | 5.4953099580  | 2.7444848440  | 17.8863013790 |
| Ce | 5.4955963370  | 8.2449937640  | 17.8854807260 |
| Ce | 2.7461975170  | 10.9951043550 | 17.8884887080 |
| Ce | 2.7451475000  | 5.4946542210  | 17.8863054330 |
| Ce | 8.2447203390  | 10.9948816300 | 17.8880605750 |
| Ce | 8.2456567280  | 5.4949393910  | 17.8854807320 |
| Ce | 2.7480801220  | 2.7478586550  | 15.1301301040 |
| Ce | 2.7480604330  | 8.2485105290  | 15.1298996710 |
| Ce | 8.2487318420  | 2.7478378120  | 15.1298966530 |
| Ce | 8.2487271290  | 8.2485057390  | 15.1295875260 |
| Ce | 10.9986249070 | 10.9984019480 | 15.1311066620 |
| Ce | 10.9986724300 | 5.4982111320  | 15.1296445340 |
| Ce | 5.4984310260  | 10.9984470740 | 15.1296469380 |
| Ce | 5.4984403860  | 5.4982168440  | 15.1288748010 |
| Ce | 10.9907443820 | 10.9891569680 | 25.7244943250 |
| Ce | -0.0100864040 | 5.4909952630  | 25.7366766630 |
| Ce | 5.4924939810  | -0.0117006830 | 25.7366868700 |
| Ce | 5.4876379550  | 5.4859976170  | 25.8018317830 |
| Ce | 0.0000000000  | 2.7500769090  | 12.3716886990 |
| Ce | 0.0000000000  | 8.2502307260  | 12.3716886990 |
| Ce | 5.5001538170  | 2.7500769090  | 12.3716886990 |
| Ce | 5.5001538170  | 8.2502307260  | 12.3716886990 |

|    |              |              |               |
|----|--------------|--------------|---------------|
| Ce | 2.7500769090 | 0.0000000000 | 12.3716849970 |
| Ce | 2.7500769090 | 5.5001538170 | 12.3716849970 |
| Ce | 8.2502307260 | 0.0000000000 | 12.3716849970 |
| Ce | 8.2502307260 | 5.5001538170 | 12.3716849970 |
| Ce | 2.7500769090 | 2.7500769090 | 9.6150052340  |
| Ce | 2.7500769090 | 8.2502307260 | 9.6150052340  |
| Ce | 8.2502307260 | 2.7500769090 | 9.6150052340  |
| Ce | 8.2502307260 | 8.2502307260 | 9.6150052340  |
| Ce | 0.0000000000 | 0.0000000000 | 9.6150447140  |
| Ce | 0.0000000000 | 5.5001538170 | 9.6150447140  |
| Ce | 5.5001538170 | 0.0000000000 | 9.6150447140  |
| Ce | 5.5001538170 | 5.5001538170 | 9.6150447140  |
| Ce | 0.0000000000 | 0.0000000000 | 4.1042991380  |
| Ce | 0.0000000000 | 5.5001538170 | 4.1042991380  |
| Ce | 5.5001538170 | 0.0000000000 | 4.1042991380  |
| Ce | 5.5001538170 | 5.5001538170 | 4.1042991380  |
| Ce | 0.0000000000 | 2.7500769090 | 6.8584163580  |
| Ce | 0.0000000000 | 8.2502307260 | 6.8584163580  |
| Ce | 5.5001538170 | 2.7500769090 | 6.8584163580  |
| Ce | 5.5001538170 | 8.2502307260 | 6.8584163580  |
| Ce | 2.7500769090 | 0.0000000000 | 6.8607432510  |
| Ce | 2.7500769090 | 5.5001538170 | 6.8607432510  |
| Ce | 8.2502307260 | 0.0000000000 | 6.8607432510  |
| Ce | 8.2502307260 | 5.5001538170 | 6.8607432510  |
| Ce | 2.7500769090 | 2.7500769090 | 4.1040885740  |
| Ce | 2.7500769090 | 8.2502307260 | 4.1040885740  |
| Ce | 8.2502307260 | 2.7500769090 | 4.1040885740  |
| Ce | 8.2502307260 | 8.2502307260 | 4.1040885740  |
| O  | 1.3687962680 | 1.3679399520 | 19.2644098370 |
| O  | 1.3688666700 | 6.8678608460 | 19.2637036790 |
| O  | 6.8687197040 | 1.3679937050 | 19.2637151180 |
| O  | 6.8690280510 | 6.8681536950 | 19.2577225260 |
| O  | 4.1198340240 | 1.3678862020 | 19.2634740500 |
| O  | 4.1193676700 | 6.8682856410 | 19.2593918680 |
| O  | 9.6197320860 | 1.3679806110 | 19.2632346140 |
| O  | 9.6197008550 | 6.8675893280 | 19.2622260830 |
| O  | 1.3687992080 | 4.1189382720 | 19.2634690530 |
| O  | 1.3688807690 | 9.6188380030 | 19.2632309580 |
| O  | 6.8692016530 | 4.1184572190 | 19.2593811960 |
| O  | 6.8684929320 | 9.6187943450 | 19.2622353820 |
| O  | 4.1188070810 | 4.1179414920 | 19.2600854940 |
| O  | 4.1192849100 | 9.6182450420 | 19.2635277120 |
| O  | 9.6191077400 | 4.1184296210 | 19.2635286980 |
| O  | 9.6193580380 | 9.6185085530 | 19.2631400770 |
| O  | 1.4256374490 | 4.1757329480 | 2.7402562040  |
| O  | 1.4256374490 | 9.6758867650 | 2.7402562040  |
| O  | 6.9257911560 | 4.1757329480 | 2.7402562040  |
| O  | 6.9257911560 | 9.6758867650 | 2.7402562040  |

|   |              |              |               |
|---|--------------|--------------|---------------|
| O | 4.0745161480 | 1.3244209790 | 2.7402562040  |
| O | 4.0745161480 | 6.8245746860 | 2.7402562040  |
| O | 9.5746696350 | 1.3244209790 | 2.7402562040  |
| O | 9.5746696350 | 6.8245746860 | 2.7402562040  |
| O | 1.3677851140 | 1.3664689910 | 22.0201260010 |
| O | 1.3676513030 | 6.8677709210 | 22.0210758400 |
| O | 6.8690892560 | 1.3663130590 | 22.0211007070 |
| O | 6.8663871070 | 6.8650448880 | 22.0114586810 |
| O | 4.1250240600 | 1.3749458320 | 8.2371202020  |
| O | 4.1250240600 | 6.8750996490 | 8.2371202020  |
| O | 9.6251778770 | 1.3749458320 | 8.2371202020  |
| O | 9.6251778770 | 6.8750996490 | 8.2371202020  |
| O | 4.0745161480 | 4.1757329480 | 2.7402562040  |
| O | 4.0745161480 | 9.6758867650 | 2.7402562040  |
| O | 9.5746696350 | 4.1757329480 | 2.7402562040  |
| O | 9.5746696350 | 9.6758867650 | 2.7402562040  |
| O | 4.1180387930 | 4.1166988180 | 22.0154759360 |
| O | 4.1160872780 | 9.6155736080 | 22.0212486410 |
| O | 9.6169125950 | 4.1147704860 | 22.0212507120 |
| O | 9.6177063240 | 9.6163966370 | 22.0180581330 |
| O | 1.4256374490 | 1.3244209790 | 2.7402562040  |
| O | 1.4256374490 | 6.8245746860 | 2.7402562040  |
| O | 6.9257911560 | 1.3244209790 | 2.7402562040  |
| O | 6.9257911560 | 6.8245746860 | 2.7402562040  |
| O | 1.3128241220 | 1.3112799770 | 24.7661647230 |
| O | 1.3096703600 | 6.8138037390 | 24.7718537870 |
| O | 6.8153138220 | 1.3080807060 | 24.7718913050 |
| O | 6.8158226490 | 6.8142369700 | 24.7496421320 |
| O | 4.1696220760 | 1.3083852000 | 24.7706564730 |
| O | 4.1619688910 | 6.8176067910 | 24.7524239090 |
| O | 9.6701246040 | 1.3109788640 | 24.7631005460 |
| O | 9.6728578990 | 6.8133247140 | 24.7673567870 |
| O | 1.3099859740 | 4.1681014890 | 24.7706663600 |
| O | 1.3125501510 | 9.6685621010 | 24.7630950630 |
| O | 6.8192041690 | 4.1603695540 | 24.7524042140 |
| O | 6.8148553820 | 9.6712566110 | 24.7673954940 |
| O | 4.1659743530 | 4.1644037800 | 24.7569796690 |
| O | 4.1684057450 | 9.6705776810 | 24.7721523050 |
| O | 9.6721693330 | 4.1668988690 | 24.7721502160 |
| O | 9.6696575760 | 9.6681138990 | 24.7634230860 |
| O | 4.1160170690 | 1.3664670660 | 22.0206545800 |
| O | 4.1168889690 | 6.8655829010 | 22.0138889440 |
| O | 9.6174918820 | 1.3664964790 | 22.0181579630 |
| O | 9.6163277370 | 6.8679406520 | 22.0188657630 |
| O | 1.3677701050 | 4.1147352080 | 22.0206567790 |
| O | 1.3677753130 | 9.6162133090 | 22.0181423930 |
| O | 6.8668907580 | 4.1155841700 | 22.0138819460 |
| O | 6.8692270530 | 9.6150255040 | 22.0188872760 |



|   |              |              |               |
|---|--------------|--------------|---------------|
| O | 4.1216840240 | 4.1212340600 | 16.5051158320 |
| O | 4.1218543980 | 9.6221000980 | 16.5066128650 |
| O | 9.6225518540 | 4.1214070370 | 16.5066097070 |
| O | 9.6222845920 | 9.6218412360 | 16.5072651090 |
| O | 1.3712686840 | 4.1211060150 | 16.5065763820 |
| O | 1.3716362180 | 9.6214299710 | 16.5074298510 |
| O | 6.8719715990 | 4.1208453650 | 16.5044781580 |
| O | 6.8717467550 | 9.6217668710 | 16.5059651460 |
| O | 1.3751295370 | 4.1252079850 | 8.2371202020  |
| O | 1.3751295370 | 9.6253618030 | 8.2371202020  |
| O | 6.8752835740 | 4.1252079850 | 8.2371202020  |
| O | 6.8752835740 | 9.6253618030 | 8.2371202020  |
| O | 4.1250240600 | 4.1252079850 | 8.2371202020  |
| O | 4.1250240600 | 9.6253618030 | 8.2371202020  |
| O | 9.6251778770 | 4.1252079850 | 8.2371202020  |
| O | 9.6251778770 | 9.6253618030 | 8.2371202020  |
| O | 1.3750397740 | 1.3750337240 | 10.9932172150 |
| O | 1.3750397740 | 6.8751878710 | 10.9932172150 |
| O | 6.8751937010 | 1.3750337240 | 10.9932172150 |
| O | 6.8751937010 | 6.8751878710 | 10.9932172150 |
| O | 4.1251139330 | 1.3750337240 | 10.9932172150 |
| O | 4.1251139330 | 6.8751878710 | 10.9932172150 |
| O | 9.6252677500 | 1.3750337240 | 10.9932172150 |
| O | 9.6252677500 | 6.8751878710 | 10.9932172150 |
| O | 1.3750397740 | 4.1251200930 | 10.9932172150 |
| O | 1.3750397740 | 9.6252735800 | 10.9932172150 |
| O | 6.8751937010 | 4.1251200930 | 10.9932172150 |
| O | 6.8751937010 | 9.6252735800 | 10.9932172150 |
| O | 4.1251139330 | 4.1251200930 | 10.9932172150 |
| O | 4.1251139330 | 9.6252735800 | 10.9932172150 |
| O | 9.6252677500 | 4.1251200930 | 10.9932172150 |
| O | 9.6252677500 | 9.6252735800 | 10.9932172150 |
| O | 4.1254519720 | 4.1247630230 | 5.4826887820  |
| O | 4.1254519720 | 9.6249168400 | 5.4826887820  |
| O | 9.6256054590 | 4.1247630230 | 5.4826887820  |
| O | 9.6256054590 | 9.6249168400 | 5.4826887820  |
| O | 1.3747019550 | 4.1247630230 | 5.4826887820  |
| O | 1.3747019550 | 9.6249168400 | 5.4826887820  |
| O | 6.8748559920 | 4.1247630230 | 5.4826887820  |
| O | 6.8748559920 | 9.6249168400 | 5.4826887820  |
| O | 1.3750384540 | 1.3750424140 | 13.7503855520 |
| O | 1.3750384540 | 6.8751961210 | 13.7503855520 |
| O | 6.8751922710 | 1.3750424140 | 13.7503855520 |
| O | 6.8751922710 | 6.8751961210 | 13.7503855520 |
| O | 4.1254519720 | 1.3753907940 | 5.4826887820  |
| O | 4.1254519720 | 6.8755446110 | 5.4826887820  |
| O | 9.6256054590 | 1.3753907940 | 5.4826887820  |
| O | 9.6256054590 | 6.8755446110 | 5.4826887820  |

|   |              |              |               |
|---|--------------|--------------|---------------|
| O | 1.3750384540 | 4.1251115130 | 13.7503855520 |
| O | 1.3750384540 | 9.6252653300 | 13.7503855520 |
| O | 6.8751922710 | 4.1251115130 | 13.7503855520 |
| O | 6.8751922710 | 9.6252653300 | 13.7503855520 |
| O | 4.1251153630 | 4.1251115130 | 13.7503855520 |
| O | 4.1251153630 | 9.6252653300 | 13.7503855520 |
| O | 9.6252691800 | 4.1251115130 | 13.7503855520 |
| O | 9.6252691800 | 9.6252653300 | 13.7503855520 |
| O | 1.3747019550 | 1.3753907940 | 5.4826887820  |
| O | 1.3747019550 | 6.8755446110 | 5.4826887820  |
| O | 6.8748559920 | 1.3753907940 | 5.4826887820  |
| O | 6.8748559920 | 6.8755446110 | 5.4826887820  |
| O | 1.3718674920 | 1.3714150590 | 16.5079428220 |
| O | 1.3716080740 | 6.8716189000 | 16.5066793630 |
| O | 6.8720690540 | 1.3711479730 | 16.5066841650 |
| O | 6.8722542220 | 6.8717982220 | 16.5036916620 |
| O | 4.1215090780 | 1.3708528940 | 16.5065780500 |
| O | 4.1212556590 | 6.8715597830 | 16.5044842380 |
| O | 9.6218320680 | 1.3712257660 | 16.5074306110 |
| O | 9.6221733740 | 6.8713404540 | 16.5059566870 |
| O | 1.3751295370 | 1.3749458320 | 8.2371202020  |
| O | 1.3751295370 | 6.8750996490 | 8.2371202020  |
| O | 6.8752835740 | 1.3749458320 | 8.2371202020  |
| O | 6.8752835740 | 6.8750996490 | 8.2371202020  |
| O | 4.1251153630 | 1.3750424140 | 13.7503855520 |
| O | 4.1251153630 | 6.8751961210 | 13.7503855520 |
| O | 9.6252691800 | 1.3750424140 | 13.7503855520 |
| O | 9.6252691800 | 6.8751961210 | 13.7503855520 |
| O | 5.3357639740 | 5.3335182390 | 28.2380309030 |
| O | 6.3042309530 | 6.3018709990 | 28.7020527530 |
| H | 6.2115247170 | 6.2092291980 | 29.6680922210 |

100-HOOH

|    |               |               |               |
|----|---------------|---------------|---------------|
| Ce | 2.7500769090  | 0.0000000000  | 1.7734174790  |
| Ce | 2.7500769090  | 5.5001538170  | 1.7734174790  |
| Ce | 8.2502307260  | 0.0000000000  | 1.7734174790  |
| Ce | 8.2502307260  | 5.5001538170  | 1.7734174790  |
| Ce | 10.9959689000 | 2.7368005780  | 23.4152542010 |
| Ce | 10.9969813090 | 8.2388659370  | 23.4170847660 |
| Ce | 5.4961151290  | 2.7420855720  | 23.4114984130 |
| Ce | 5.4980263920  | 8.2403962070  | 23.4046043590 |
| Ce | 2.7527047240  | 10.9893651820 | 23.4156259400 |
| Ce | 2.7423012910  | 5.4883256580  | 23.4010070680 |
| Ce | 8.2513336990  | 10.9905336280 | 23.4175852180 |
| Ce | 8.2375389400  | 5.4901011490  | 23.4122921380 |
| Ce | 2.7493153530  | 2.7398541750  | 20.6525222370 |

|    |               |               |               |
|----|---------------|---------------|---------------|
| Ce | 2.7493927600  | 8.2412662410  | 20.6520369800 |
| Ce | 8.2493393790  | 2.7409286790  | 20.6552065150 |
| Ce | 8.2506221370  | 8.2414238710  | 20.6534825780 |
| Ce | 0.0021061280  | 10.9901132610 | 20.6586301180 |
| Ce | 10.9955532250 | 5.4900908490  | 20.6511415010 |
| Ce | 5.5024420200  | 10.9922652540 | 20.6506665410 |
| Ce | 5.4973800310  | 5.4910454910  | 20.6430569880 |
| Ce | 0.0019193830  | 2.7422511030  | 17.8949853430 |
| Ce | 0.0026211340  | 8.2439521140  | 17.8943291660 |
| Ce | 5.5021364360  | 2.7429292300  | 17.8902269530 |
| Ce | 5.5027056060  | 8.2447716180  | 17.8897492820 |
| Ce | 2.7529672260  | 10.9934859760 | 17.8939258050 |
| Ce | 2.7496112710  | 5.4935245580  | 17.8904059250 |
| Ce | 8.2546084930  | 10.9940844360 | 17.8948419230 |
| Ce | 8.2513978940  | 5.4939871140  | 17.8900647520 |
| Ce | 2.7518670430  | 2.7477817600  | 15.1316867730 |
| Ce | 2.7520121700  | 8.2473681850  | 15.1315517380 |
| Ce | 8.2515434600  | 2.7477465860  | 15.1319032750 |
| Ce | 8.2516688510  | 8.2475871450  | 15.1314863240 |
| Ce | 0.0017807650  | 10.9973851650 | 15.1326102130 |
| Ce | 0.0008098290  | 5.4972909500  | 15.1312761080 |
| Ce | 5.5019895800  | 10.9977325890 | 15.1311009240 |
| Ce | 5.5008620590  | 5.4976072980  | 15.1316186790 |
| Ce | 0.0068100910  | 10.9878318940 | 25.7363973520 |
| Ce | -0.0087640920 | 5.4844631710  | 25.7276164240 |
| Ce | 5.5054032350  | -0.0115534230 | 25.7302003990 |
| Ce | 5.4740679420  | 5.4964638780  | 25.7195432190 |
| Ce | 0.0000000000  | 2.7500769090  | 12.3716886990 |
| Ce | 0.0000000000  | 8.2502307260  | 12.3716886990 |
| Ce | 5.5001538170  | 2.7500769090  | 12.3716886990 |
| Ce | 5.5001538170  | 8.2502307260  | 12.3716886990 |
| Ce | 2.7500769090  | 0.0000000000  | 12.3716849970 |
| Ce | 2.7500769090  | 5.5001538170  | 12.3716849970 |
| Ce | 8.2502307260  | 0.0000000000  | 12.3716849970 |
| Ce | 8.2502307260  | 5.5001538170  | 12.3716849970 |
| Ce | 2.7500769090  | 2.7500769090  | 9.6150052340  |
| Ce | 2.7500769090  | 8.2502307260  | 9.6150052340  |
| Ce | 8.2502307260  | 2.7500769090  | 9.6150052340  |
| Ce | 8.2502307260  | 8.2502307260  | 9.6150052340  |
| Ce | 0.0000000000  | 0.0000000000  | 9.6150447140  |
| Ce | 0.0000000000  | 5.5001538170  | 9.6150447140  |
| Ce | 5.5001538170  | 0.0000000000  | 9.6150447140  |
| Ce | 5.5001538170  | 5.5001538170  | 9.6150447140  |
| Ce | 0.0000000000  | 0.0000000000  | 4.1042991380  |
| Ce | 0.0000000000  | 5.5001538170  | 4.1042991380  |
| Ce | 5.5001538170  | 0.0000000000  | 4.1042991380  |
| Ce | 5.5001538170  | 5.5001538170  | 4.1042991380  |
| Ce | 0.0000000000  | 2.7500769090  | 6.8584163580  |

|    |              |              |               |
|----|--------------|--------------|---------------|
| Ce | 0.000000000  | 8.2502307260 | 6.8584163580  |
| Ce | 5.5001538170 | 2.7500769090 | 6.8584163580  |
| Ce | 5.5001538170 | 8.2502307260 | 6.8584163580  |
| Ce | 2.7500769090 | 0.0000000000 | 6.8607432510  |
| Ce | 2.7500769090 | 5.5001538170 | 6.8607432510  |
| Ce | 8.2502307260 | 0.0000000000 | 6.8607432510  |
| Ce | 8.2502307260 | 5.5001538170 | 6.8607432510  |
| Ce | 2.7500769090 | 2.7500769090 | 4.1040885740  |
| Ce | 2.7500769090 | 8.2502307260 | 4.1040885740  |
| Ce | 8.2502307260 | 2.7500769090 | 4.1040885740  |
| Ce | 8.2502307260 | 8.2502307260 | 4.1040885740  |
| O  | 1.3770966510 | 1.3649829830 | 19.2778798840 |
| O  | 1.3730672730 | 6.8670761280 | 19.2707135710 |
| O  | 6.8785799700 | 1.3661408850 | 19.2711740330 |
| O  | 6.8758544100 | 6.8684404020 | 19.2639804960 |
| O  | 4.1277018740 | 1.3657716310 | 19.2705797960 |
| O  | 4.1244254610 | 6.8680510880 | 19.2663856840 |
| O  | 9.6291989000 | 1.3658975990 | 19.2797460060 |
| O  | 9.6267573870 | 6.8676629000 | 19.2718494950 |
| O  | 1.3727917990 | 4.1161174340 | 19.2707435270 |
| O  | 1.3775155070 | 9.6176584120 | 19.2776452150 |
| O  | 6.8752620870 | 4.1169415640 | 19.2696566010 |
| O  | 6.8793459010 | 9.6195109850 | 19.2704407250 |
| O  | 4.1237037340 | 4.1163918990 | 19.2651361860 |
| O  | 4.1275259670 | 9.6187770530 | 19.2696428750 |
| O  | 9.6255010260 | 4.1160749700 | 19.2707955740 |
| O  | 9.6297009580 | 9.6176226190 | 19.2785475530 |
| O  | 1.4256374490 | 4.1757329480 | 2.7402562040  |
| O  | 1.4256374490 | 9.6758867650 | 2.7402562040  |
| O  | 6.9257911560 | 4.1757329480 | 2.7402562040  |
| O  | 6.9257911560 | 9.6758867650 | 2.7402562040  |
| O  | 4.0745161480 | 1.3244209790 | 2.7402562040  |
| O  | 4.0745161480 | 6.8245746860 | 2.7402562040  |
| O  | 9.5746696350 | 1.3244209790 | 2.7402562040  |
| O  | 9.5746696350 | 6.8245746860 | 2.7402562040  |
| O  | 1.3744974370 | 1.3636832760 | 22.0389531420 |
| O  | 1.3697537610 | 6.8646401850 | 22.0286382300 |
| O  | 6.8755826940 | 1.3665587440 | 22.0312557980 |
| O  | 6.8725015800 | 6.8667063540 | 22.0160034290 |
| O  | 4.1250240600 | 1.3749458320 | 8.2371202020  |
| O  | 4.1250240600 | 6.8750996490 | 8.2371202020  |
| O  | 9.6251778770 | 1.3749458320 | 8.2371202020  |
| O  | 9.6251778770 | 6.8750996490 | 8.2371202020  |
| O  | 4.0745161480 | 4.1757329480 | 2.7402562040  |
| O  | 4.0745161480 | 9.6758867650 | 2.7402562040  |
| O  | 9.5746696350 | 4.1757329480 | 2.7402562040  |
| O  | 9.5746696350 | 9.6758867650 | 2.7402562040  |
| O  | 4.1199410520 | 4.1143415980 | 22.0168813150 |

|   |              |              |               |
|---|--------------|--------------|---------------|
| O | 4.1251946870 | 9.6158126260 | 22.0277941710 |
| O | 9.6191122450 | 4.1137113800 | 22.0316793610 |
| O | 9.6259424910 | 9.6146289310 | 22.0409962770 |
| O | 1.4256374490 | 1.3244209790 | 2.7402562040  |
| O | 1.4256374490 | 6.8245746860 | 2.7402562040  |
| O | 6.9257911560 | 1.3244209790 | 2.7402562040  |
| O | 6.9257911560 | 6.8245746860 | 2.7402562040  |
| O | 1.3276541070 | 1.3111522390 | 24.7871374470 |
| O | 1.3108939250 | 6.8085565660 | 24.7782513990 |
| O | 6.8264077430 | 1.3119675190 | 24.7797023590 |
| O | 6.8098560170 | 6.8173122630 | 24.7545115140 |
| O | 4.1811383560 | 1.3112483210 | 24.7815247460 |
| O | 4.1535233950 | 6.8208679620 | 24.7660759330 |
| O | 9.6811066070 | 1.3108237860 | 24.7904290500 |
| O | 9.6666590880 | 6.8105781900 | 24.7883942940 |
| O | 1.3112359100 | 4.1629781160 | 24.7782216800 |
| O | 1.3276761160 | 9.6635079780 | 24.7874279050 |
| O | 6.8105692420 | 4.1660211130 | 24.7819089160 |
| O | 6.8276217150 | 9.6685189170 | 24.7774338370 |
| O | 4.1535735990 | 4.1635090720 | 24.7554872060 |
| O | 4.1819037440 | 9.6688727120 | 24.7762172460 |
| O | 9.6674939910 | 4.1638207140 | 24.7800853310 |
| O | 9.6811787640 | 9.6642886760 | 24.7921149410 |
| O | 4.1240757040 | 1.3649126650 | 22.0308866130 |
| O | 4.1212431520 | 6.8649420620 | 22.0201574640 |
| O | 9.6235639460 | 1.3646446980 | 22.0401191350 |
| O | 9.6208224670 | 6.8650808100 | 22.0351648800 |
| O | 1.3682095410 | 4.1121273480 | 22.0283201530 |
| O | 1.3758062350 | 9.6124296140 | 22.0392060810 |
| O | 6.8702108480 | 4.1158573280 | 22.0285110770 |
| O | 6.8772221670 | 9.6171115660 | 22.0290198120 |
| O | 4.1272786620 | 4.1202754830 | 16.5086110390 |
| O | 4.1281410370 | 9.6205713250 | 16.5094601420 |
| O | 9.6271960010 | 4.1192641950 | 16.5100868640 |
| O | 9.6293851260 | 9.6204440860 | 16.5148732710 |
| O | 1.3762072960 | 4.1192077600 | 16.5105889890 |
| O | 1.3780894740 | 9.6202025460 | 16.5148321070 |
| O | 6.8765989330 | 4.1205147930 | 16.5106022100 |
| O | 6.8794145200 | 9.6209799490 | 16.5102230270 |
| O | 1.3751295370 | 4.1252079850 | 8.2371202020  |
| O | 1.3751295370 | 9.6253618030 | 8.2371202020  |
| O | 6.8752835740 | 4.1252079850 | 8.2371202020  |
| O | 6.8752835740 | 9.6253618030 | 8.2371202020  |
| O | 4.1250240600 | 4.1252079850 | 8.2371202020  |
| O | 4.1250240600 | 9.6253618030 | 8.2371202020  |
| O | 9.6251778770 | 4.1252079850 | 8.2371202020  |
| O | 9.6251778770 | 9.6253618030 | 8.2371202020  |
| O | 1.3750397740 | 1.3750337240 | 10.9932172150 |

|   |              |              |               |
|---|--------------|--------------|---------------|
| O | 1.3750397740 | 6.8751878710 | 10.9932172150 |
| O | 6.8751937010 | 1.3750337240 | 10.9932172150 |
| O | 6.8751937010 | 6.8751878710 | 10.9932172150 |
| O | 4.1251139330 | 1.3750337240 | 10.9932172150 |
| O | 4.1251139330 | 6.8751878710 | 10.9932172150 |
| O | 9.6252677500 | 1.3750337240 | 10.9932172150 |
| O | 9.6252677500 | 6.8751878710 | 10.9932172150 |
| O | 1.3750397740 | 4.1251200930 | 10.9932172150 |
| O | 1.3750397740 | 9.6252735800 | 10.9932172150 |
| O | 6.8751937010 | 4.1251200930 | 10.9932172150 |
| O | 6.8751937010 | 9.6252735800 | 10.9932172150 |
| O | 4.1251139330 | 4.1251200930 | 10.9932172150 |
| O | 4.1251139330 | 9.6252735800 | 10.9932172150 |
| O | 9.6252677500 | 4.1251200930 | 10.9932172150 |
| O | 9.6252677500 | 9.6252735800 | 10.9932172150 |
| O | 4.1254519720 | 4.1247630230 | 5.4826887820  |
| O | 4.1254519720 | 9.6249168400 | 5.4826887820  |
| O | 9.6256054590 | 4.1247630230 | 5.4826887820  |
| O | 9.6256054590 | 9.6249168400 | 5.4826887820  |
| O | 1.3747019550 | 4.1247630230 | 5.4826887820  |
| O | 1.3747019550 | 9.6249168400 | 5.4826887820  |
| O | 6.8748559920 | 4.1247630230 | 5.4826887820  |
| O | 6.8748559920 | 9.6249168400 | 5.4826887820  |
| O | 1.3750384540 | 1.3750424140 | 13.7503855520 |
| O | 1.3750384540 | 6.8751961210 | 13.7503855520 |
| O | 6.8751922710 | 1.3750424140 | 13.7503855520 |
| O | 6.8751922710 | 6.8751961210 | 13.7503855520 |
| O | 4.1254519720 | 1.3753907940 | 5.4826887820  |
| O | 4.1254519720 | 6.8755446110 | 5.4826887820  |
| O | 9.6256054590 | 1.3753907940 | 5.4826887820  |
| O | 9.6256054590 | 6.8755446110 | 5.4826887820  |
| O | 1.3750384540 | 4.1251115130 | 13.7503855520 |
| O | 1.3750384540 | 9.6252653300 | 13.7503855520 |
| O | 6.8751922710 | 4.1251115130 | 13.7503855520 |
| O | 6.8751922710 | 9.6252653300 | 13.7503855520 |
| O | 4.1251153630 | 4.1251115130 | 13.7503855520 |
| O | 4.1251153630 | 9.6252653300 | 13.7503855520 |
| O | 9.6252691800 | 4.1251115130 | 13.7503855520 |
| O | 9.6252691800 | 9.6252653300 | 13.7503855520 |
| O | 1.3747019550 | 1.3753907940 | 5.4826887820  |
| O | 1.3747019550 | 6.8755446110 | 5.4826887820  |
| O | 6.8748559920 | 1.3753907940 | 5.4826887820  |
| O | 6.8748559920 | 6.8755446110 | 5.4826887820  |
| O | 1.3781782890 | 1.3693941840 | 16.5149286470 |
| O | 1.3768469680 | 6.8706498020 | 16.5103671820 |
| O | 6.8795336390 | 1.3702609750 | 16.5106228860 |
| O | 6.8772821300 | 6.8701037260 | 16.5081408900 |
| O | 4.1277349320 | 1.3701183750 | 16.5100707040 |

|   |              |              |               |
|---|--------------|--------------|---------------|
| O | 4.1269251030 | 6.8701989070 | 16.5096800700 |
| O | 9.6285292750 | 1.3697529340 | 16.5153163890 |
| O | 9.6272799690 | 6.8706963990 | 16.5104162640 |
| O | 1.3751295370 | 1.3749458320 | 8.2371202020  |
| O | 1.3751295370 | 6.8750996490 | 8.2371202020  |
| O | 6.8752835740 | 1.3749458320 | 8.2371202020  |
| O | 6.8752835740 | 6.8750996490 | 8.2371202020  |
| O | 4.1251153630 | 1.3750424140 | 13.7503855520 |
| O | 4.1251153630 | 6.8751961210 | 13.7503855520 |
| O | 9.6252691800 | 1.3750424140 | 13.7503855520 |
| O | 9.6252691800 | 6.8751961210 | 13.7503855520 |
| O | 5.3311469290 | 5.3120110710 | 28.6759776630 |
| O | 6.0805324850 | 6.5725183770 | 28.5615088640 |
| H | 6.9652315980 | 6.2674351700 | 28.8443619020 |
| H | 4.5905491240 | 5.6055436030 | 29.2412874770 |

#### 110-OOH

|    |              |               |               |
|----|--------------|---------------|---------------|
| Ce | 1.3750384540 | 0.0000000000  | 2.1094769160  |
| Ce | 1.3750384540 | 7.7783890300  | 2.1094769160  |
| Ce | 6.8751922710 | 0.0000000000  | 2.1094769160  |
| Ce | 6.8751922710 | 7.7783890300  | 2.1094769160  |
| Ce | 4.1283234130 | 1.9482194000  | 15.4116400170 |
| Ce | 4.1202817150 | 9.7167337800  | 15.4129269840 |
| Ce | 9.6276545670 | 1.9500375010  | 15.4096095070 |
| Ce | 9.6195638410 | 9.7161823420  | 15.4091821970 |
| Ce | 1.3852535750 | 3.8976183930  | 13.7268287660 |
| Ce | 1.3733547890 | 11.6679309170 | 13.7192152400 |
| Ce | 6.8651067390 | 3.8920233460  | 13.7243696190 |
| Ce | 6.8716460480 | 11.6645430970 | 13.7188597810 |
| Ce | 1.3757623460 | 0.0021751190  | 13.7190960240 |
| Ce | 1.3826273420 | 7.7745347250  | 13.7255163600 |
| Ce | 6.8743617610 | -0.0018320150 | 13.7187816990 |
| Ce | 6.8617924710 | 7.7696915980  | 13.7233897750 |
| Ce | 4.1240164790 | 5.8330561990  | 11.6742852310 |
| Ce | 4.1243991710 | 13.6117048270 | 11.6375122230 |
| Ce | 9.6244190120 | 5.8334191460  | 11.6462208780 |
| Ce | 9.6244128960 | 13.6119365570 | 11.6373018360 |
| Ce | 4.1246185070 | 1.9437338220  | 11.6426056390 |
| Ce | 4.1236368970 | 9.7233488050  | 11.6429655500 |
| Ce | 9.6251013020 | 1.9490194290  | 11.6429549810 |
| Ce | 9.6236321140 | 9.7181422520  | 11.6426939060 |
| Ce | 1.3765629120 | 3.8934117750  | 9.7533736880  |
| Ce | 1.3747173070 | 11.6660212780 | 9.7508949380  |
| Ce | 6.8726090810 | 3.8925549550  | 9.7529916340  |
| Ce | 6.8746249640 | 11.6654014630 | 9.7507423420  |
| Ce | 1.3745673140 | 0.0018644180  | 9.7508218490  |

|    |               |               |               |
|----|---------------|---------------|---------------|
| Ce | 1.3767685390  | 7.7745507860  | 9.7533364160  |
| Ce | 6.8745450040  | 0.0011602070  | 9.7507172900  |
| Ce | 6.8727549740  | 7.7737525040  | 9.7528529730  |
| Ce | 4.1251153630  | 1.9445972570  | 7.7511731640  |
| Ce | 4.1251153630  | 9.7229862880  | 7.7511731640  |
| Ce | 9.6252691800  | 1.9445972570  | 7.7511731640  |
| Ce | 9.6252691800  | 9.7229862880  | 7.7511731640  |
| Ce | 1.3750384540  | 3.8891945150  | 5.8698462730  |
| Ce | 1.3750384540  | 11.6675835450 | 5.8698462730  |
| Ce | 6.8751922710  | 3.8891945150  | 5.8698462730  |
| Ce | 6.8751922710  | 11.6675835450 | 5.8698462730  |
| Ce | 1.3750384540  | 0.0000000000  | 5.8698462730  |
| Ce | 1.3750384540  | 7.7783890300  | 5.8698462730  |
| Ce | 6.8751922710  | 0.0000000000  | 5.8698462730  |
| Ce | 6.8751922710  | 7.7783890300  | 5.8698462730  |
| Ce | 4.1251153630  | 5.8337917730  | 7.7511731640  |
| Ce | 4.1251153630  | 13.6121808030 | 7.7511731640  |
| Ce | 9.6252691800  | 5.8337917730  | 7.7511731640  |
| Ce | 9.6252691800  | 13.6121808030 | 7.7511731640  |
| Ce | 4.1244082690  | 5.8358844840  | 15.5122658720 |
| Ce | 4.1234064150  | 13.6110190750 | 15.4076169200 |
| Ce | 9.6234363960  | 5.8344614750  | 15.4179002220 |
| Ce | 9.6236691590  | 13.6113483190 | 15.4075081540 |
| Ce | 1.3750384540  | 3.8891945150  | 2.1094769160  |
| Ce | 1.3750384540  | 11.6675835450 | 2.1094769160  |
| Ce | 6.8751922710  | 3.8891945150  | 2.1094769160  |
| Ce | 6.8751922710  | 11.6675835450 | 2.1094769160  |
| Ce | 4.1251153630  | 1.9445972570  | 3.7800833660  |
| Ce | 4.1251153630  | 9.7229862880  | 3.7800833660  |
| Ce | 9.6252691800  | 1.9445972570  | 3.7800833660  |
| Ce | 9.6252691800  | 9.7229862880  | 3.7800833660  |
| Ce | 4.1251153630  | 5.8337917730  | 3.7800833660  |
| Ce | 4.1251153630  | 13.6121808030 | 3.7800833660  |
| Ce | 9.6252691800  | 5.8337917730  | 3.7800833660  |
| Ce | 9.6252691800  | 13.6121808030 | 3.7800833660  |
| O  | 2.8242889830  | -0.0083413520 | 15.5616838320 |
| O  | 2.8157077950  | 7.8196735250  | 15.5433625540 |
| O  | 8.3273579850  | -0.0077184930 | 15.5616881210 |
| O  | 8.3227204990  | 7.7798301860  | 15.5655856460 |
| O  | 10.9257070480 | 0.0011989800  | 15.5605300590 |
| O  | 10.9170514220 | 7.7804927390  | 15.5677248930 |
| O  | 5.4288736750  | 15.5473625060 | 15.5615357790 |
| O  | 5.4206321050  | 7.8045213220  | 15.5338132590 |
| O  | 2.7412080810  | 5.8370936600  | 13.6494987560 |
| O  | 2.7508562230  | 13.6124933850 | 13.6232865150 |
| O  | 8.2547702400  | 5.8318958980  | 13.6352093430 |
| O  | 8.2532993380  | 13.6094554070 | 13.6258273020 |
| O  | 10.9929151180 | 5.8343901510  | 13.6360764900 |



|   |               |               |               |
|---|---------------|---------------|---------------|
| O | 10.9944787560 | 13.6140483530 | 13.6259994990 |
| O | 5.5053634690  | 5.8281281580  | 13.6484353820 |
| O | 5.4965664790  | 13.6106196340 | 13.6235108690 |
| O | 2.6770410260  | 1.9445972570  | 1.9601089810  |
| O | 2.6770410260  | 9.7229862880  | 1.9601089810  |
| O | 8.1771948430  | 1.9445972570  | 1.9601089810  |
| O | 8.1771948430  | 9.7229862880  | 1.9601089810  |
| O | 2.7494700640  | -0.0017974360 | 11.6836108750 |
| O | 2.7513708360  | 7.7785874380  | 11.6945142920 |
| O | 8.2508059640  | -0.0000574180 | 11.6876811820 |
| O | 8.2498248840  | 7.7745114340  | 11.6860881860 |
| O | 2.7530147140  | 1.9348763560  | 13.6246892290 |
| O | 2.7501209040  | 9.7373466570  | 13.6198319070 |
| O | 8.2538277060  | 1.9440906190  | 13.6317633910 |
| O | 8.2500547750  | 9.7195877380  | 13.6279557490 |
| O | 10.9981558720 | 1.9479194080  | 13.6288703350 |
| O | 10.9942590570 | 9.7227505570  | 13.6314801200 |
| O | 5.4973377680  | 1.9277965470  | 13.6181002610 |
| O | 5.4942632440  | 9.7349277930  | 13.6223712190 |
| O | 10.9258519460 | 3.8869538170  | 15.5671104930 |
| O | 10.9194669490 | 11.6742092120 | 15.5615067870 |
| O | 5.4335641690  | 3.8437913510  | 15.5390709720 |
| O | 5.4226426390  | 11.6748766790 | 15.5620065090 |
| O | 0.0730357720  | 5.8337917730  | 1.9601089810  |
| O | 0.0730357720  | 13.6121808030 | 1.9601089810  |
| O | 5.5731897000  | 5.8337917730  | 1.9601089810  |
| O | 5.5731897000  | 13.6121808030 | 1.9601089810  |
| O | 2.7513087820  | 3.8898675970  | 11.6964948970 |
| O | 2.7490418640  | 11.6714162030 | 11.6816463560 |
| O | 8.2502259040  | 3.8898413180  | 11.6876175140 |
| O | 8.2502783980  | 11.6662225110 | 11.6863472080 |
| O | 10.9987416300 | 3.8925022360  | 11.6869535480 |
| O | 10.9981019970 | 11.6671596760 | 11.6875122920 |
| O | 5.4969655850  | 3.8877703750  | 11.6935587120 |
| O | 5.4989935260  | 11.6695368250 | 11.6823340250 |
| O | 2.6770410260  | 5.8337917730  | 1.9601089810  |
| O | 2.6770410260  | 13.6121808030 | 1.9601089810  |
| O | 8.1771948430  | 5.8337917730  | 1.9601089810  |
| O | 8.1771948430  | 13.6121808030 | 1.9601089810  |
| O | 0.0730357720  | 1.9445972570  | 1.9601089810  |
| O | 0.0730357720  | 9.7229862880  | 1.9601089810  |
| O | 5.5731897000  | 1.9445972570  | 1.9601089810  |
| O | 5.5731897000  | 9.7229862880  | 1.9601089810  |
| O | 2.7478803670  | 3.8891945150  | 3.8858678670  |
| O | 2.7478803670  | 11.6675835450 | 3.8858678670  |
| O | 8.2480339640  | 3.8891945150  | 3.8858678670  |
| O | 8.2480339640  | 11.6675835450 | 3.8858678670  |
| O | 10.9993264680 | 5.8342783750  | 9.7243453630  |

|   |               |               |               |
|---|---------------|---------------|---------------|
| O | 10.9996745380 | 13.6121804020 | 9.7245348320  |
| O | 5.4983068660  | 5.8336866590  | 9.7327032020  |
| O | 5.4994093000  | 13.6113637600 | 9.7214594970  |
| O | 0.0016904170  | 1.9445972570  | 5.8217789370  |
| O | 0.0016904170  | 9.7229862880  | 5.8217789370  |
| O | 5.5018441240  | 1.9445972570  | 5.8217789370  |
| O | 5.5018441240  | 9.7229862880  | 5.8217789370  |
| O | 2.7483863810  | 1.9445972570  | 5.8217789370  |
| O | 2.7483863810  | 9.7229862880  | 5.8217789370  |
| O | 8.2485404180  | 1.9445972570  | 5.8217789370  |
| O | 8.2485404180  | 9.7229862880  | 5.8217789370  |
| O | 0.0021965410  | 3.8891945150  | 3.8858678670  |
| O | 0.0021965410  | 11.6675835450 | 3.8858678670  |
| O | 5.5023505780  | 3.8891945150  | 3.8858678670  |
| O | 5.5023505780  | 11.6675835450 | 3.8858678670  |
| O | 0.0016904170  | 5.8337917730  | 5.8217789370  |
| O | 0.0016904170  | 13.6121808030 | 5.8217789370  |
| O | 5.5018441240  | 5.8337917730  | 5.8217789370  |
| O | 5.5018441240  | 13.6121808030 | 5.8217789370  |
| O | 2.7483863810  | 5.8337917730  | 5.8217789370  |
| O | 2.7483863810  | 13.6121808030 | 5.8217789370  |
| O | 8.2485404180  | 5.8337917730  | 5.8217789370  |
| O | 8.2485404180  | 13.6121808030 | 5.8217789370  |
| O | 0.0002820480  | 0.0000000000  | 7.7806341730  |
| O | 0.0002820480  | 7.7783890300  | 7.7806341730  |
| O | 5.5004360850  | 0.0000000000  | 7.7806341730  |
| O | 5.5004360850  | 7.7783890300  | 7.7806341730  |
| O | 10.9987777690 | 0.0011995270  | 11.6869506980 |
| O | -0.0019996440 | 7.7768040750  | 11.6879492410 |
| O | 5.4993732280  | -0.0052258780 | 11.6813506670 |
| O | 5.4966960520  | 7.7768144460  | 11.6957332650 |
| O | 2.7497947510  | 0.0000000000  | 7.7806341730  |
| O | 2.7497947510  | 7.7783890300  | 7.7806341730  |
| O | 8.2499484580  | 0.0000000000  | 7.7806341730  |
| O | 8.2499484580  | 7.7783890300  | 7.7806341730  |
| O | 2.7497947510  | 3.8891945150  | 7.7806341730  |
| O | 2.7497947510  | 11.6675835450 | 7.7806341730  |
| O | 8.2499484580  | 3.8891945150  | 7.7806341730  |
| O | 8.2499484580  | 11.6675835450 | 7.7806341730  |
| O | 2.8271052140  | 3.8649296290  | 15.5472814610 |
| O | 2.8181314420  | 11.6756850070 | 15.5616042400 |
| O | 8.3312614810  | 3.8864961240  | 15.5691997880 |
| O | 8.3212795540  | 11.6657742660 | 15.5606536530 |
| O | 2.7478803670  | 0.0000000000  | 3.8858678670  |
| O | 2.7478803670  | 7.7783890300  | 3.8858678670  |
| O | 8.2480339640  | 0.0000000000  | 3.8858678670  |
| O | 8.2480339640  | 7.7783890300  | 3.8858678670  |
| O | 10.9996541810 | 1.9457822230  | 9.7256500870  |

|   |               |               |               |
|---|---------------|---------------|---------------|
| O | 10.9993448540 | 9.7220839570  | 9.7257496180  |
| O | 5.4994457320  | 1.9461710840  | 9.7248118780  |
| O | 5.4993152100  | 9.7198172620  | 9.7252784060  |
| O | 2.7497331470  | 1.9472310420  | 9.7251667800  |
| O | 2.7494865720  | 9.7207365970  | 9.7250365300  |
| O | 8.2502176670  | 1.9451260280  | 9.7256049170  |
| O | 8.2498842750  | 9.7215556260  | 9.7253375360  |
| O | 0.0021965410  | 0.0000000000  | 3.8858678670  |
| O | 0.0021965410  | 7.7783890300  | 3.8858678670  |
| O | 5.5023505780  | 0.0000000000  | 3.8858678670  |
| O | 5.5023505780  | 7.7783890300  | 3.8858678670  |
| O | 0.0002820480  | 3.8891945150  | 7.7806341730  |
| O | 0.0002820480  | 11.6675835450 | 7.7806341730  |
| O | 5.5004360850  | 3.8891945150  | 7.7806341730  |
| O | 5.5004360850  | 11.6675835450 | 7.7806341730  |
| O | 2.7504627520  | 5.8333944990  | 9.7329576270  |
| O | 2.7497546040  | 13.6128658200 | 9.7219007720  |
| O | 8.2502599630  | 5.8327626810  | 9.7242214500  |
| O | 8.2498131150  | 13.6121299840 | 9.7241912010  |
| O | 4.1168503640  | 5.7408329180  | 17.9859268430 |
| O | 4.8130085430  | 6.7595591330  | 18.6505274620 |
| H | 4.7952213000  | 6.4399361700  | 19.5765603770 |

110-HOOH

|    |              |               |               |
|----|--------------|---------------|---------------|
| Ce | 1.3750384540 | 0.0000000000  | 2.1094769160  |
| Ce | 1.3750384540 | 7.7783890300  | 2.1094769160  |
| Ce | 6.8751922710 | 0.0000000000  | 2.1094769160  |
| Ce | 6.8751922710 | 7.7783890300  | 2.1094769160  |
| Ce | 4.1433498120 | 1.9273936340  | 15.3963118220 |
| Ce | 4.1524404930 | 9.8182854770  | 15.4265586640 |
| Ce | 9.6555154080 | 1.9559802630  | 15.3994445770 |
| Ce | 9.6223418200 | 9.7455847040  | 15.4022046630 |
| Ce | 1.3970979250 | 3.9065327390  | 13.7209616860 |
| Ce | 1.3782038280 | 11.6581761410 | 13.7060506540 |
| Ce | 6.8798744460 | 3.8895314450  | 13.7363977730 |
| Ce | 6.8913447340 | 11.6948876720 | 13.7154225200 |
| Ce | 1.3942362850 | 0.0001891700  | 13.7100887400 |
| Ce | 1.3377843570 | 7.7725436360  | 13.6332675260 |
| Ce | 6.8955260570 | 0.0120973820  | 13.7175391700 |
| Ce | 6.8395542680 | 7.7952933380  | 13.7381235190 |
| Ce | 4.1215864750 | 5.8343241370  | 11.7040507380 |
| Ce | 4.1321163240 | 13.6156625250 | 11.6293516490 |
| Ce | 9.6018006170 | 5.8351480750  | 11.6353871450 |
| Ce | 9.6334893510 | 13.6223362480 | 11.6288455620 |
| Ce | 4.1317885420 | 1.9435469450  | 11.6386343240 |
| Ce | 4.1210918790 | 9.7315245320  | 11.6509763900 |

|    |               |               |               |
|----|---------------|---------------|---------------|
| Ce | 9.6344570540  | 1.9553301840  | 11.6351835910 |
| Ce | 9.6037807470  | 9.7332532970  | 11.6297300740 |
| Ce | 1.3791897530  | 3.9024413440  | 9.7519068950  |
| Ce | 1.3707356380  | 11.6627576900 | 9.7451914300  |
| Ce | 6.8670894820  | 3.8966123460  | 9.7531341460  |
| Ce | 6.8720160830  | 11.6739022780 | 9.7446980640  |
| Ce | 1.3762907560  | 0.0005083250  | 9.7464342060  |
| Ce | 1.3739692510  | 7.7768203070  | 9.7348260720  |
| Ce | 6.8773763750  | 0.0060423340  | 9.7456580920  |
| Ce | 6.8614662310  | 7.7745404540  | 9.7545338750  |
| Ce | 4.1251153630  | 1.9445972570  | 7.7511731640  |
| Ce | 4.1251153630  | 9.7229862880  | 7.7511731640  |
| Ce | 9.6252691800  | 1.9445972570  | 7.7511731640  |
| Ce | 9.6252691800  | 9.7229862880  | 7.7511731640  |
| Ce | 1.3750384540  | 3.8891945150  | 5.8698462730  |
| Ce | 1.3750384540  | 11.6675835450 | 5.8698462730  |
| Ce | 6.8751922710  | 3.8891945150  | 5.8698462730  |
| Ce | 6.8751922710  | 11.6675835450 | 5.8698462730  |
| Ce | 1.3750384540  | 0.0000000000  | 5.8698462730  |
| Ce | 1.3750384540  | 7.7783890300  | 5.8698462730  |
| Ce | 6.8751922710  | 0.0000000000  | 5.8698462730  |
| Ce | 6.8751922710  | 7.7783890300  | 5.8698462730  |
| Ce | 4.1251153630  | 5.8337917730  | 7.7511731640  |
| Ce | 4.1251153630  | 13.6121808030 | 7.7511731640  |
| Ce | 9.6252691800  | 5.8337917730  | 7.7511731640  |
| Ce | 9.6252691800  | 13.6121808030 | 7.7511731640  |
| Ce | 4.1568411440  | 5.7329574580  | 15.6043600680 |
| Ce | 4.1613578370  | 13.6405920700 | 15.3935507000 |
| Ce | 9.6156884350  | 5.8399410280  | 15.4005365540 |
| Ce | 9.6532747930  | 13.6256899060 | 15.4011393750 |
| Ce | 1.3750384540  | 3.8891945150  | 2.1094769160  |
| Ce | 1.3750384540  | 11.6675835450 | 2.1094769160  |
| Ce | 6.8751922710  | 3.8891945150  | 2.1094769160  |
| Ce | 6.8751922710  | 11.6675835450 | 2.1094769160  |
| Ce | 4.1251153630  | 1.9445972570  | 3.7800833660  |
| Ce | 4.1251153630  | 9.7229862880  | 3.7800833660  |
| Ce | 9.6252691800  | 1.9445972570  | 3.7800833660  |
| Ce | 9.6252691800  | 9.7229862880  | 3.7800833660  |
| Ce | 4.1251153630  | 5.8337917730  | 3.7800833660  |
| Ce | 4.1251153630  | 13.6121808030 | 3.7800833660  |
| Ce | 9.6252691800  | 5.8337917730  | 3.7800833660  |
| Ce | 9.6252691800  | 13.6121808030 | 3.7800833660  |
| O  | 2.8501621270  | -0.0327823530 | 15.5488309410 |
| O  | 2.6511591350  | 7.8375348980  | 15.8436839590 |
| O  | 8.3679761060  | 0.0107725550  | 15.5464445210 |
| O  | 8.3211774980  | 7.7907491080  | 15.5307258360 |
| O  | 10.9616461310 | 0.0120397730  | 15.5445171950 |
| O  | 10.9668595760 | 7.8003779480  | 15.5944381250 |

|   |               |               |               |
|---|---------------|---------------|---------------|
| O | 5.4709187040  | 15.5508211750 | 15.5511839190 |
| O | 5.3053660500  | 7.9269030340  | 15.4711095730 |
| O | 2.7341971090  | 5.9112616150  | 13.7002179160 |
| O | 2.7665367930  | 13.5955017460 | 13.6148069060 |
| O | 8.2429178830  | 5.8390975070  | 13.6195173980 |
| O | 8.2738032110  | 13.6196374090 | 13.6283307310 |
| O | 10.9730999840 | 5.8643437930  | 13.6064826950 |
| O | 0.0123048620  | 13.6126123720 | 13.6168183490 |
| O | 5.5073206870  | 5.7994815490  | 13.7199456600 |
| O | 5.5165400450  | 13.6302387810 | 13.5951256890 |
| O | 2.6770410260  | 1.9445972570  | 1.9601089810  |
| O | 2.6770410260  | 9.7229862880  | 1.9601089810  |
| O | 8.1771948430  | 1.9445972570  | 1.9601089810  |
| O | 8.1771948430  | 9.7229862880  | 1.9601089810  |
| O | 2.7592291710  | -0.0139562470 | 11.6680691460 |
| O | 2.7217817610  | 7.7782824760  | 11.6726578400 |
| O | 8.2622688560  | 0.0060530390  | 11.6868744440 |
| O | 8.2286731990  | 7.7880366320  | 11.6822262180 |
| O | 2.7645445750  | 1.9133099350  | 13.5911735860 |
| O | 2.7564550730  | 9.6645230400  | 13.6517175700 |
| O | 8.2731974650  | 1.9623153110  | 13.6300078970 |
| O | 8.2484480320  | 9.7454185270  | 13.6224880400 |
| O | 0.0143947730  | 1.9567443700  | 13.6140950190 |
| O | 10.9844182890 | 9.7148878480  | 13.6069746180 |
| O | 5.5127055090  | 1.9313027540  | 13.5925911560 |
| O | 5.5028988210  | 9.8177489260  | 13.6001428800 |
| O | 10.9359305000 | 3.9203824170  | 15.5348676020 |
| O | 10.9589074520 | 11.6640326130 | 15.5396998230 |
| O | 5.4688258060  | 3.7546973430  | 15.5889602270 |
| O | 5.4647404170  | 11.7569278060 | 15.5734093360 |
| O | 0.0730357720  | 5.8337917730  | 1.9601089810  |
| O | 0.0730357720  | 13.6121808030 | 1.9601089810  |
| O | 5.5731897000  | 5.8337917730  | 1.9601089810  |
| O | 5.5731897000  | 13.6121808030 | 1.9601089810  |
| O | 2.7540053380  | 3.9200388300  | 11.7171293300 |
| O | 2.7420162280  | 11.6423182220 | 11.7054413270 |
| O | 8.2534851900  | 3.8948234270  | 11.6792311870 |
| O | 8.2485491990  | 11.6818734120 | 11.6770960670 |
| O | 10.9972379510 | 3.9069755480  | 11.6725720220 |
| O | 10.9940952390 | 11.6690482920 | 11.6822192530 |
| O | 5.4997650320  | 3.9030611090  | 11.6923010550 |
| O | 5.4939148550  | 11.6893569110 | 11.6529250460 |
| O | 2.6770410260  | 5.8337917730  | 1.9601089810  |
| O | 2.6770410260  | 13.6121808030 | 1.9601089810  |
| O | 8.1771948430  | 5.8337917730  | 1.9601089810  |
| O | 8.1771948430  | 13.6121808030 | 1.9601089810  |
| O | 0.0730357720  | 1.9445972570  | 1.9601089810  |
| O | 0.0730357720  | 9.7229862880  | 1.9601089810  |

|   |               |               |               |
|---|---------------|---------------|---------------|
| O | 5.5731897000  | 1.9445972570  | 1.9601089810  |
| O | 5.5731897000  | 9.7229862880  | 1.9601089810  |
| O | 2.7478803670  | 3.8891945150  | 3.8858678670  |
| O | 2.7478803670  | 11.6675835450 | 3.8858678670  |
| O | 8.2480339640  | 3.8891945150  | 3.8858678670  |
| O | 8.2480339640  | 11.6675835450 | 3.8858678670  |
| O | 10.9924573750 | 5.8412613760  | 9.7125836730  |
| O | 0.0010156700  | 13.6108593140 | 9.7169630630  |
| O | 5.4893975470  | 5.8484634530  | 9.7443867860  |
| O | 5.5030277650  | 13.6205072730 | 9.7085729300  |
| O | 0.0016904170  | 1.9445972570  | 5.8217789370  |
| O | 0.0016904170  | 9.7229862880  | 5.8217789370  |
| O | 5.5018441240  | 1.9445972570  | 5.8217789370  |
| O | 5.5018441240  | 9.7229862880  | 5.8217789370  |
| O | 2.7483863810  | 1.9445972570  | 5.8217789370  |
| O | 2.7483863810  | 9.7229862880  | 5.8217789370  |
| O | 8.2485404180  | 1.9445972570  | 5.8217789370  |
| O | 8.2485404180  | 9.7229862880  | 5.8217789370  |
| O | 0.0021965410  | 3.8891945150  | 3.8858678670  |
| O | 0.0021965410  | 11.6675835450 | 3.8858678670  |
| O | 5.5023505780  | 3.8891945150  | 3.8858678670  |
| O | 5.5023505780  | 11.6675835450 | 3.8858678670  |
| O | 0.0016904170  | 5.8337917730  | 5.8217789370  |
| O | 0.0016904170  | 13.6121808030 | 5.8217789370  |
| O | 5.5018441240  | 5.8337917730  | 5.8217789370  |
| O | 5.5018441240  | 13.6121808030 | 5.8217789370  |
| O | 2.7483863810  | 5.8337917730  | 5.8217789370  |
| O | 2.7483863810  | 13.6121808030 | 5.8217789370  |
| O | 8.2485404180  | 5.8337917730  | 5.8217789370  |
| O | 8.2485404180  | 13.6121808030 | 5.8217789370  |
| O | 0.0002820480  | 0.0000000000  | 7.7806341730  |
| O | 0.0002820480  | 7.7783890300  | 7.7806341730  |
| O | 5.5004360850  | 0.0000000000  | 7.7806341730  |
| O | 5.5004360850  | 7.7783890300  | 7.7806341730  |
| O | 0.0063065970  | -0.0006450410 | 11.6739784440 |
| O | -0.0201872650 | 7.7877349390  | 11.6663990870 |
| O | 5.5063731550  | 0.0049988270  | 11.6658311070 |
| O | 5.4751163690  | 7.7687248960  | 11.7454254820 |
| O | 2.7497947510  | 0.0000000000  | 7.7806341730  |
| O | 2.7497947510  | 7.7783890300  | 7.7806341730  |
| O | 8.2499484580  | 0.0000000000  | 7.7806341730  |
| O | 8.2499484580  | 7.7783890300  | 7.7806341730  |
| O | 2.7497947510  | 3.8891945150  | 7.7806341730  |
| O | 2.7497947510  | 11.6675835450 | 7.7806341730  |
| O | 8.2499484580  | 3.8891945150  | 7.7806341730  |
| O | 8.2499484580  | 11.6675835450 | 7.7806341730  |
| O | 2.8290303930  | 3.8123026770  | 15.4792864250 |
| O | 2.8495222550  | 11.6332208660 | 15.5521440680 |

|   |               |               |               |
|---|---------------|---------------|---------------|
| O | 8.3401284950  | 3.9171470750  | 15.5784234950 |
| O | 8.3581943190  | 11.6733533220 | 15.5705626860 |
| O | 2.7478803670  | 0.0000000000  | 3.8858678670  |
| O | 2.7478803670  | 7.7783890300  | 3.8858678670  |
| O | 8.2480339640  | 0.0000000000  | 3.8858678670  |
| O | 8.2480339640  | 7.7783890300  | 3.8858678670  |
| O | 0.0044262620  | 1.9494291090  | 9.7225100830  |
| O | 10.9923868710 | 9.7271632610  | 9.7165971700  |
| O | 5.4998014720  | 1.9534488140  | 9.7178434760  |
| O | 5.4931622950  | 9.7055816230  | 9.7401160100  |
| O | 2.7507199310  | 1.9561354380  | 9.7339664740  |
| O | 2.7487318170  | 9.7266431430  | 9.7215402100  |
| O | 8.2506532590  | 1.9497502330  | 9.7241793910  |
| O | 8.2382084230  | 9.7252220660  | 9.7233822120  |
| O | 0.0021965410  | 0.0000000000  | 3.8858678670  |
| O | 0.0021965410  | 7.7783890300  | 3.8858678670  |
| O | 5.5023505780  | 0.0000000000  | 3.8858678670  |
| O | 5.5023505780  | 7.7783890300  | 3.8858678670  |
| O | 0.0002820480  | 3.8891945150  | 7.7806341730  |
| O | 0.0002820480  | 11.6675835450 | 7.7806341730  |
| O | 5.5004360850  | 3.8891945150  | 7.7806341730  |
| O | 5.5004360850  | 11.6675835450 | 7.7806341730  |
| O | 2.7491528790  | 5.8310152010  | 9.7349272430  |
| O | 2.7505752620  | 13.5988141280 | 9.7220190280  |
| O | 8.2363057090  | 5.8385891450  | 9.7187342570  |
| O | 8.2532083780  | 13.6164719960 | 9.7197782020  |
| O | 3.9638316570  | 5.4086651410  | 17.8330219930 |
| O | 5.3990099360  | 5.6746957520  | 17.8133282730 |
| H | 5.7789627760  | 4.7659677450  | 17.8213434950 |
| H | 1.7672435270  | 7.8305357330  | 16.2777246790 |

#### 111-OOH

|    |               |              |              |
|----|---------------|--------------|--------------|
| Ce | 3.8844302000  | 0.0000000000 | 6.0047050620 |
| Ce | 5.8266454740  | 3.3640178510 | 6.0047050620 |
| Ce | 7.7688608070  | 6.7280358020 | 6.0047050620 |
| Ce | 7.7688605160  | 0.0000000000 | 6.0047050620 |
| Ce | 9.7110757900  | 3.3640178510 | 6.0047050620 |
| Ce | 11.6532911230 | 6.7280358020 | 6.0047050620 |
| Ce | 0.0000000000  | 0.0000000000 | 6.0047050620 |
| Ce | 1.9422152750  | 3.3640178510 | 6.0047050620 |
| Ce | 3.8844306070  | 6.7280358020 | 6.0047050620 |
| Ce | 3.8769559300  | 2.2510021690 | 9.1965298690 |
| Ce | 5.8219449300  | 5.6107636780 | 9.1903839270 |
| Ce | 7.7591968470  | 8.9776528510 | 9.1957776090 |
| Ce | 7.7673780030  | 2.2556951360 | 9.2163045470 |
| Ce | 9.6996338640  | 5.6047693850 | 9.2155231930 |

|    |               |              |               |
|----|---------------|--------------|---------------|
| Ce | 11.6539738980 | 8.9720298180 | 9.2016197760  |
| Ce | 11.6408795900 | 2.2517287390 | 9.2027941540  |
| Ce | 13.5896168750 | 5.6117667900 | 9.1873401040  |
| Ce | 15.5307719320 | 8.9760347960 | 9.1880555870  |
| Ce | 1.9422151580  | 1.1213397540 | 2.8456536130  |
| Ce | 3.8844303160  | 4.4853574030 | 2.8456536130  |
| Ce | 5.8266457650  | 7.8493755570 | 2.8456536130  |
| Ce | 5.8266457070  | 1.1213397540 | 2.8456536130  |
| Ce | 7.7688608650  | 4.4853574030 | 2.8456536130  |
| Ce | 9.7110763140  | 7.8493755570 | 2.8456536130  |
| Ce | 9.7110759070  | 1.1213397540 | 2.8456536130  |
| Ce | 11.6532910650 | 4.4853574030 | 2.8456536130  |
| Ce | 13.5955065140 | 7.8493755570 | 2.8456536130  |
| Ce | 1.9323974510  | 1.1311887170 | 12.3441079680 |
| Ce | 3.8695926760  | 4.4959007810 | 12.3504753740 |
| Ce | 5.8112439620  | 7.8625820380 | 12.3490873400 |
| Ce | 5.8121205700  | 1.1285431600 | 12.3567139570 |
| Ce | 7.7420822970  | 4.5089795450 | 12.4144514690 |
| Ce | 9.6996033830  | 7.8643491550 | 12.3540637020 |
| Ce | 9.7031669190  | 1.1063345630 | 12.3645502590 |
| Ce | 11.6700152390 | 4.5054853600 | 12.3597035620 |
| Ce | 13.5928811350 | 7.8550541960 | 12.3574961760 |
| O  | 3.8856889340  | 0.0013471740 | 8.4190866600  |
| O  | 5.8197560460  | 3.3615908130 | 8.3992776200  |
| O  | 7.7680092370  | 6.7377135490 | 8.3996902320  |
| O  | 7.7605590670  | 0.0043634220 | 8.4024168810  |
| O  | 9.7043231770  | 3.3693080290 | 8.4127813310  |
| O  | 11.6459986610 | 6.7348138490 | 8.4024447590  |
| O  | 11.6460666020 | 0.0036980270 | 8.3984357660  |
| O  | 13.5902483690 | 3.3714160930 | 8.3975613920  |
| O  | 15.5331103880 | 6.7318198790 | 8.3960120450  |
| O  | 3.8844303740  | 2.2426790040 | 2.0626843520  |
| O  | 5.8266454740  | 5.6066965520 | 2.0626843520  |
| O  | 7.7688609230  | 8.9707147060 | 2.0626843520  |
| O  | 7.7688608070  | 2.2426790040 | 2.0626843520  |
| O  | 9.7110759070  | 5.6066965520 | 2.0626843520  |
| O  | 11.6532913560 | 8.9707147060 | 2.0626843520  |
| O  | 11.6532911230 | 2.2426790040 | 2.0626843520  |
| O  | 13.5955062230 | 5.6066965520 | 2.0626843520  |
| O  | 15.5377216720 | 8.9707147060 | 2.0626843520  |
| O  | 3.8543030520  | 2.2295863060 | 11.5352557720 |
| O  | 5.7965844120  | 5.6260034560 | 11.5638080140 |
| O  | 7.7658404290  | 9.0164094910 | 11.5305304600 |
| O  | 7.7804962160  | 2.2804527590 | 11.5924108620 |
| O  | 9.6897877630  | 5.5853588690 | 11.5906184620 |
| O  | 11.6416524600 | 8.9806505300 | 11.5521742770 |
| O  | 11.6377587460 | 2.2549923070 | 11.5539026360 |
| O  | 13.5948311700 | 5.6145899880 | 11.5456402780 |



|   |               |               |               |
|---|---------------|---------------|---------------|
| O | 15.5297954890 | 8.9746316700  | 11.5473771010 |
| O | 3.8844300250  | 2.2426790040  | 6.8014205150  |
| O | 5.8266451240  | 5.6066965520  | 6.8014205150  |
| O | 7.7688605740  | 8.9707147060  | 6.8014205150  |
| O | 7.7688608070  | 2.2426790040  | 6.8014205150  |
| O | 9.7110759070  | 5.6066965520  | 6.8014205150  |
| O | 11.6532913560 | 8.9707147060  | 6.8014205150  |
| O | 11.6532911230 | 2.2426790040  | 6.8014205150  |
| O | 13.5955062230 | 5.6066965520  | 6.8014205150  |
| O | 15.5377216720 | 8.9707147060  | 6.8014205150  |
| O | 3.8844305490  | 0.0000000000  | 3.6488352620  |
| O | 5.8266458240  | 3.3640178510  | 3.6488352620  |
| O | 7.7688611560  | 6.7280358020  | 3.6488352620  |
| O | 7.7688612150  | 0.0000000000  | 3.6488352620  |
| O | 9.7110764890  | 3.3640178510  | 3.6488352620  |
| O | 11.6532918220 | 6.7280358020  | 3.6488352620  |
| O | 0.0000000000  | 0.0000000000  | 3.6488352620  |
| O | 1.9422152750  | 3.3640178510  | 3.6488352620  |
| O | 3.8844306070  | 6.7280358020  | 3.6488352620  |
| O | 3.8793288770  | 0.0059842590  | 13.1397266080 |
| O | 5.7602742000  | 3.3582981260  | 13.1171253430 |
| O | 7.7433685670  | 6.7879298550  | 13.1113922840 |
| O | 13.5937048310 | 10.0886968690 | 13.1373493230 |
| O | 9.7820127860  | 3.3301963170  | 13.1746919670 |
| O | 11.6613725800 | 6.7353001820  | 13.1338206410 |
| O | 11.6405797850 | 0.0026469330  | 13.1355745610 |
| O | 13.5937170520 | 3.3778191880  | 13.1346759440 |
| O | 15.5105508270 | 6.7461204050  | 13.1420108960 |
| O | 1.9422148080  | 1.1213397540  | 5.1931696170  |
| O | 3.8844299660  | 4.4853574030  | 5.1931696170  |
| O | 5.8266454160  | 7.8493755570  | 5.1931696170  |
| O | 5.8266453580  | 1.1213397540  | 5.1931696170  |
| O | 7.7688605160  | 4.4853574030  | 5.1931696170  |
| O | 9.7110759650  | 7.8493755570  | 5.1931696170  |
| O | 9.7110759070  | 1.1213397540  | 5.1931696170  |
| O | 11.6532910650 | 4.4853574030  | 5.1931696170  |
| O | 13.5955065140 | 7.8493755570  | 5.1931696170  |
| O | 1.9133862550  | 1.1440543780  | 10.0019185030 |
| O | 3.8797184860  | 4.4878818010  | 10.0037533850 |
| O | 5.8217122240  | 7.8558610800  | 10.0036091990 |
| O | 5.8463495320  | 1.1414887670  | 10.0327180100 |
| O | 7.7408935360  | 4.5029359200  | 9.9945272430  |
| O | 9.7043420110  | 7.8277853130  | 10.0312138850 |
| O | 9.6984340310  | 1.1173696000  | 10.0117622870 |
| O | 11.6521071670 | 4.5013129950  | 10.0111088510 |
| O | 13.5895391240 | 7.8544566990  | 10.0064072680 |
| O | 8.0867115350  | 4.0625994810  | 14.9034409280 |
| O | 8.5186685110  | 5.0814134550  | 15.7113469760 |

|   |              |              |               |
|---|--------------|--------------|---------------|
| H | 8.7366136270 | 4.6166352740 | 16.5502455000 |
|---|--------------|--------------|---------------|

111-HOOH

|    |               |              |               |
|----|---------------|--------------|---------------|
| Ce | 3.8844302000  | 0.0000000000 | 6.0047050620  |
| Ce | 5.8266454740  | 3.3640178510 | 6.0047050620  |
| Ce | 7.7688608070  | 6.7280358020 | 6.0047050620  |
| Ce | 7.7688605160  | 0.0000000000 | 6.0047050620  |
| Ce | 9.7110757900  | 3.3640178510 | 6.0047050620  |
| Ce | 11.6532911230 | 6.7280358020 | 6.0047050620  |
| Ce | 0.0000000000  | 0.0000000000 | 6.0047050620  |
| Ce | 1.9422152750  | 3.3640178510 | 6.0047050620  |
| Ce | 3.8844306070  | 6.7280358020 | 6.0047050620  |
| Ce | 3.8769559300  | 2.2510021690 | 9.1965298690  |
| Ce | 5.8219449300  | 5.6107636780 | 9.1903839270  |
| Ce | 7.7591968470  | 8.9776528510 | 9.1957776090  |
| Ce | 7.7673780030  | 2.2556951360 | 9.2163045470  |
| Ce | 9.6996338640  | 5.6047693850 | 9.2155231930  |
| Ce | 11.6539738980 | 8.9720298180 | 9.2016197760  |
| Ce | 11.6408795900 | 2.2517287390 | 9.2027941540  |
| Ce | 13.5896168750 | 5.6117667900 | 9.1873401040  |
| Ce | 15.5307719320 | 8.9760347960 | 9.1880555870  |
| Ce | 1.9422151580  | 1.1213397540 | 2.8456536130  |
| Ce | 3.8844303160  | 4.4853574030 | 2.8456536130  |
| Ce | 5.8266457650  | 7.8493755570 | 2.8456536130  |
| Ce | 5.8266457070  | 1.1213397540 | 2.8456536130  |
| Ce | 7.7688608650  | 4.4853574030 | 2.8456536130  |
| Ce | 9.7110763140  | 7.8493755570 | 2.8456536130  |
| Ce | 9.7110759070  | 1.1213397540 | 2.8456536130  |
| Ce | 11.6532910650 | 4.4853574030 | 2.8456536130  |
| Ce | 13.5955065140 | 7.8493755570 | 2.8456536130  |
| Ce | 1.9330057010  | 1.1338360050 | 12.3458874600 |
| Ce | 3.8627019050  | 4.4972672700 | 12.3480578610 |
| Ce | 5.8052223920  | 7.8772221570 | 12.3531533050 |
| Ce | 5.8147226330  | 1.1194060940 | 12.3599505370 |
| Ce | 7.7223164740  | 4.4647278560 | 12.3842989360 |
| Ce | 9.7045210800  | 7.8736251470 | 12.3632408020 |
| Ce | 9.7101602980  | 1.1157427620 | 12.3729989890 |
| Ce | 11.6591055810 | 4.5010912430 | 12.3653096980 |
| Ce | 13.5935153080 | 7.8528586420 | 12.3609479200 |
| O  | 3.8856889340  | 0.0013471740 | 8.4190866600  |
| O  | 5.8197560460  | 3.3615908130 | 8.3992776200  |
| O  | 7.7680092370  | 6.7377135490 | 8.3996902320  |
| O  | 7.7605590670  | 0.0043634220 | 8.4024168810  |
| O  | 9.7043231770  | 3.3693080290 | 8.4127813310  |
| O  | 11.6459986610 | 6.7348138490 | 8.4024447590  |
| O  | 11.6460666020 | 0.0036980270 | 8.3984357660  |

|   |               |               |               |
|---|---------------|---------------|---------------|
| O | 13.5902483690 | 3.3714160930  | 8.3975613920  |
| O | 15.5331103880 | 6.7318198790  | 8.3960120450  |
| O | 3.8844303740  | 2.2426790040  | 2.0626843520  |
| O | 5.8266454740  | 5.6066965520  | 2.0626843520  |
| O | 7.7688609230  | 8.9707147060  | 2.0626843520  |
| O | 7.7688608070  | 2.2426790040  | 2.0626843520  |
| O | 9.7110759070  | 5.6066965520  | 2.0626843520  |
| O | 11.6532913560 | 8.9707147060  | 2.0626843520  |
| O | 11.6532911230 | 2.2426790040  | 2.0626843520  |
| O | 13.5955062230 | 5.6066965520  | 2.0626843520  |
| O | 15.5377216720 | 8.9707147060  | 2.0626843520  |
| O | 3.8543030520  | 2.2295863060  | 11.5352557720 |
| O | 5.7965844120  | 5.6260034560  | 11.5638080140 |
| O | 7.7658404290  | 9.0164094910  | 11.5305304600 |
| O | 7.7930466330  | 2.2764737250  | 11.5857794670 |
| O | 9.6631518500  | 5.5752473300  | 11.6058313260 |
| O | 11.6416524600 | 8.9806505300  | 11.5521742770 |
| O | 11.6341500780 | 2.2632651880  | 11.5620287830 |
| O | 13.5948311700 | 5.6145899880  | 11.5456402780 |
| O | 15.5297954890 | 8.9746316700  | 11.5473771010 |
| O | 3.8844300250  | 2.2426790040  | 6.8014205150  |
| O | 5.8266451240  | 5.6066965520  | 6.8014205150  |
| O | 7.7688605740  | 8.9707147060  | 6.8014205150  |
| O | 7.7688608070  | 2.2426790040  | 6.8014205150  |
| O | 9.7110759070  | 5.6066965520  | 6.8014205150  |
| O | 11.6532913560 | 8.9707147060  | 6.8014205150  |
| O | 11.6532911230 | 2.2426790040  | 6.8014205150  |
| O | 13.5955062230 | 5.6066965520  | 6.8014205150  |
| O | 15.5377216720 | 8.9707147060  | 6.8014205150  |
| O | 3.8844305490  | 0.0000000000  | 3.6488352620  |
| O | 5.8266458240  | 3.3640178510  | 3.6488352620  |
| O | 7.7688611560  | 6.7280358020  | 3.6488352620  |
| O | 7.7688612150  | 0.0000000000  | 3.6488352620  |
| O | 9.7110764890  | 3.3640178510  | 3.6488352620  |
| O | 11.6532918220 | 6.7280358020  | 3.6488352620  |
| O | 0.0000000000  | 0.0000000000  | 3.6488352620  |
| O | 1.9422152750  | 3.3640178510  | 3.6488352620  |
| O | 3.8844306070  | 6.7280358020  | 3.6488352620  |
| O | 3.8793288770  | 0.0059842590  | 13.1397266080 |
| O | 5.7866902940  | 3.3480043920  | 13.1037620610 |
| O | 7.7467141360  | 6.8436466470  | 13.2049029350 |
| O | 13.5937048310 | 10.0886968690 | 13.1373493230 |
| O | 9.7505567450  | 3.3252737240  | 13.2423665620 |
| O | 11.6613725800 | 6.7353001820  | 13.1338206410 |
| O | 11.6405797850 | 0.0026469330  | 13.1355745610 |
| O | 13.5937170520 | 3.3778191880  | 13.1346759440 |
| O | 15.5105508270 | 6.7461204050  | 13.1420108960 |
| O | 1.9422148080  | 1.1213397540  | 5.1931696170  |

|   |               |              |               |
|---|---------------|--------------|---------------|
| O | 3.8844299660  | 4.4853574030 | 5.1931696170  |
| O | 5.8266454160  | 7.8493755570 | 5.1931696170  |
| O | 5.8266453580  | 1.1213397540 | 5.1931696170  |
| O | 7.7688605160  | 4.4853574030 | 5.1931696170  |
| O | 9.7110759650  | 7.8493755570 | 5.1931696170  |
| O | 9.7110759070  | 1.1213397540 | 5.1931696170  |
| O | 11.6532910650 | 4.4853574030 | 5.1931696170  |
| O | 13.5955065140 | 7.8493755570 | 5.1931696170  |
| O | 1.9133862550  | 1.1440543780 | 10.0019185030 |
| O | 3.8797184860  | 4.4878818010 | 10.0037533850 |
| O | 5.8217122240  | 7.8558610800 | 10.0036091990 |
| O | 5.8463495320  | 1.1414887670 | 10.0327180100 |
| O | 7.7408935360  | 4.5029359200 | 9.9945272430  |
| O | 9.7043420110  | 7.8277853130 | 10.0312138850 |
| O | 9.6984340310  | 1.1173696000 | 10.0117622870 |
| O | 11.6521071670 | 4.5013129950 | 10.0111088510 |
| O | 13.5895391240 | 7.8544566990 | 10.0064072680 |
| O | 7.9099775350  | 4.9399490050 | 14.9902909020 |
| O | 9.2551774030  | 4.6379124680 | 15.4811570360 |
| H | 9.5462815080  | 4.0037892660 | 14.7435084700 |
| H | 7.9775845500  | 5.8934726750 | 14.6746248650 |

#### 221-Ce1-OOH

|    |               |               |              |
|----|---------------|---------------|--------------|
| Ce | 1.9445951940  | 2.4093844220  | 2.8000527150 |
| Ce | 9.7229868580  | 2.4093844220  | 2.8000527150 |
| Ce | 5.8337906370  | 2.4093844220  | 2.8000527150 |
| Ce | 13.6121826120 | 2.4093844220  | 2.8000527150 |
| Ce | 0.0000208070  | 10.9489391440 | 3.6444218520 |
| Ce | 7.7784124720  | 10.9489391440 | 3.6444218520 |
| Ce | 3.8892167170  | 10.9489391440 | 3.6444218520 |
| Ce | 11.6676082260 | 10.9489391440 | 3.6444218520 |
| Ce | 1.9445888540  | 7.8041438960  | 4.5298469320 |
| Ce | 9.7229803630  | 7.8041438960  | 4.5298469320 |
| Ce | -1.9446067450 | 7.8041438960  | 4.5298469320 |
| Ce | 5.8337846090  | 7.8041438960  | 4.5298469320 |
| Ce | 0.0000089450  | 4.6047904270  | 5.2434760540 |
| Ce | 7.7784006100  | 4.6047904270  | 5.2434760540 |
| Ce | 3.8892043880  | 4.6047904270  | 5.2434760540 |
| Ce | 11.6675954310 | 4.6047904270  | 5.2434760540 |
| Ce | 5.8337863200  | 1.3053169250  | 6.3566574820 |
| Ce | 13.6121782950 | 1.3053169250  | 6.3566574820 |
| Ce | 1.9445902540  | 1.3053169250  | 6.3566574820 |
| Ce | 9.7229816080  | 1.3053169250  | 6.3566574820 |
| Ce | 3.8891978160  | 9.7009476410  | 7.3076483830 |
| Ce | 11.6675893240 | 9.7009476410  | 7.3076483830 |
| Ce | 0.0000019060  | 9.7009476410  | 7.3076483830 |

|    |               |               |               |
|----|---------------|---------------|---------------|
| Ce | 7.7783935700  | 9.7009476410  | 7.3076483830  |
| Ce | -1.9445979550 | 6.4819932090  | 8.1585764310  |
| Ce | 5.8337937090  | 6.4819932090  | 8.1585764310  |
| Ce | 1.9445979550  | 6.4819932090  | 8.1585764310  |
| Ce | 9.7229894640  | 6.4819932090  | 8.1585764310  |
| Ce | 0.0018013900  | 3.2693260220  | 9.0094287790  |
| Ce | 7.7779780870  | 3.2684551970  | 9.0140765940  |
| Ce | 3.8927360580  | 3.2667743920  | 9.0111554740  |
| Ce | 11.6701637030 | 3.2711596360  | 9.0117891100  |
| Ce | 1.9454394000  | 0.0058357640  | 9.9637263680  |
| Ce | 9.7291250400  | 0.0089677320  | 9.9643731460  |
| Ce | 5.8355759280  | -0.0014889130 | 9.9926231420  |
| Ce | 13.6170258390 | 0.0092322280  | 9.9618954240  |
| Ce | 0.0083696050  | 8.3957099680  | 11.0799510470 |
| Ce | 7.7831189710  | 8.3910526230  | 11.0775297000 |
| Ce | 3.8860344400  | 8.3967645640  | 11.0786170010 |
| Ce | 11.6744666970 | 8.3882135630  | 11.0788228410 |
| Ce | 1.9453791830  | 5.1883871080  | 11.7996524780 |
| Ce | 9.7335657930  | 5.1897086900  | 11.8046336160 |
| Ce | 5.8327881000  | 5.1916881280  | 11.8039401760 |
| Ce | 13.6233426750 | 5.1898980470  | 11.8014661910 |
| Ce | 0.0073820530  | 2.0502945980  | 12.6764503540 |
| Ce | 7.7838051300  | 2.0523743760  | 12.6774970010 |
| Ce | 3.8953888770  | 2.0488575220  | 12.6787141810 |
| Ce | 11.6791470580 | 2.0517532530  | 12.6773415630 |
| Ce | 1.9404918530  | 10.5760349090 | 13.6175783940 |
| Ce | 9.7412223270  | 10.5904765110 | 13.5313571680 |
| Ce | -1.9259454990 | 10.6035265900 | 13.5331565090 |
| Ce | 5.8282457860  | 10.6059158610 | 13.5314997800 |
| O  | 0.0000278850  | 1.0936971120  | 2.2401547390  |
| O  | 7.7784193940  | 1.0936971120  | 2.2401547390  |
| O  | 3.8892236400  | 1.0936971120  | 2.2401547390  |
| O  | 11.6676151490 | 1.0936971120  | 2.2401547390  |
| O  | 0.0000530100  | 3.6598501530  | 3.0304604640  |
| O  | 7.7784442070  | 3.6598501530  | 3.0304604640  |
| O  | 3.8892489200  | 3.6598501530  | 3.0304604640  |
| O  | 11.6676399620 | 3.6598501530  | 3.0304604640  |
| O  | 1.9445652470  | 9.6970730690  | 3.1665399670  |
| O  | 9.7229567560  | 9.6970730690  | 3.1665399670  |
| O  | -1.9446308190 | 9.6970730690  | 3.1665399670  |
| O  | 5.8337610010  | 9.6970730690  | 3.1665399670  |
| O  | 1.9445956990  | 0.6173987810  | 4.1099962430  |
| O  | 9.7229875190  | 0.6173987810  | 4.1099962430  |
| O  | 5.8337917650  | 0.6173987810  | 4.1099962430  |
| O  | 13.6121832740 | 0.6173987810  | 4.1099962430  |
| O  | 3.8892287350  | 6.6033288830  | 4.0372105540  |
| O  | 11.6676205550 | 6.6033288830  | 4.0372105540  |
| O  | 0.0000329800  | 6.6033288830  | 4.0372105540  |

|   |               |               |              |
|---|---------------|---------------|--------------|
| O | 7.7784249560  | 6.6033288830  | 4.0372105540 |
| O | 1.9446021160  | 3.2313913800  | 4.8946937290 |
| O | 9.7229937810  | 3.2313913800  | 4.8946937290 |
| O | 5.8337975600  | 3.2313913800  | 4.8946937290 |
| O | 13.6121886020 | 3.2313913800  | 4.8946937290 |
| O | 0.0000032280  | 9.1016627900  | 5.0340550170 |
| O | 7.7783944260  | 9.1016627900  | 5.0340550170 |
| O | 3.8891991380  | 9.1016627900  | 5.0340550170 |
| O | 11.6675911140 | 9.1016627900  | 5.0340550170 |
| O | 0.0000087900  | 11.6608973020 | 5.8961619820 |
| O | 7.7784002980  | 11.6608973020 | 5.8961619820 |
| O | 13.6122023700 | 5.8211656850  | 5.8086849850 |
| O | 5.8338108610  | 5.8211656850  | 5.8086849850 |
| O | 1.9446152620  | 5.8211656850  | 5.8086849850 |
| O | 9.7230066150  | 5.8211656850  | 5.8086849850 |
| O | 11.6675960530 | 11.6608973020 | 5.8961619820 |
| O | 3.8892045440  | 11.6608973020 | 5.8961619820 |
| O | -0.0000275740 | 2.6100309870  | 6.7405680980 |
| O | 7.7783636230  | 2.6100309870  | 6.7405680980 |
| O | -1.9446299240 | 8.4026813220  | 6.8008587780 |
| O | 5.8337614290  | 8.4026813220  | 6.8008587780 |
| O | 3.8891683360  | 2.6100309870  | 6.7405680980 |
| O | 11.6675603110 | 2.6100309870  | 6.7405680980 |
| O | 1.9445656750  | 8.4026813220  | 6.8008587780 |
| O | 9.7229571830  | 8.4026813220  | 6.8008587780 |
| O | 0.0000562380  | 5.2025083220  | 7.6500997840 |
| O | 7.7784479020  | 5.2025083220  | 7.6500997840 |
| O | 3.8892516810  | 5.2025083220  | 7.6500997840 |
| O | 11.6676427230 | 5.2025083220  | 7.6500997840 |
| O | 1.9445942210  | 11.0066060770 | 7.7246176470 |
| O | 9.7229852630  | 11.0066060770 | 7.7246176470 |
| O | -1.9446015330 | 11.0066060770 | 7.7246176470 |
| O | 5.8337895090  | 11.0066060770 | 7.7246176470 |
| O | 0.0000555280  | 7.7666557540  | 8.6653878430 |
| O | 7.7825415250  | 7.7683326850  | 8.6711320430 |
| O | 3.8925054580  | 7.7666193920  | 8.6652547990 |
| O | 11.6682900330 | 7.7654621270  | 8.6720553980 |
| O | 1.9446019220  | 1.9573791750  | 8.5925352150 |
| O | 9.7229938970  | 1.9573791750  | 8.5925352150 |
| O | 5.8337972100  | 1.9573791750  | 8.5925352150 |
| O | 13.6121887180 | 1.9573791750  | 8.5925352150 |
| O | 1.9451974800  | 4.5677306260  | 9.5141630930 |
| O | 9.7268558920  | 4.5708550970  | 9.5187162880 |
| O | 5.8373787200  | 4.5729628390  | 9.5184265160 |
| O | 13.6141279170 | 4.5737597090  | 9.5154335980 |
| O | 0.0010566930  | 10.3614145910 | 9.5918161880 |
| O | 7.7808311620  | 10.3665991820 | 9.5835803540 |
| O | 3.8929948570  | 10.3631749450 | 9.5938336930 |

|   |               |               |               |
|---|---------------|---------------|---------------|
| O | 11.6698859660 | 10.3626479090 | 9.5812617450  |
| O | -0.0010173450 | 1.3244339370  | 10.4147989450 |
| O | 7.7774874520  | 1.3239966820  | 10.4239461260 |
| O | 3.8968275930  | 1.3197536180  | 10.4222327730 |
| O | 11.6802763360 | 1.3301146610  | 10.4170467080 |
| O | -1.9408381700 | 7.1609653550  | 10.5203879980 |
| O | 5.8386161580  | 7.1621722180  | 10.5211972560 |
| O | 1.9478017700  | 7.1547263720  | 10.5114313070 |
| O | 9.7256993840  | 7.1580474680  | 10.5208001890 |
| O | -1.9507791600 | 9.7553115850  | 11.4354552960 |
| O | 5.8504979480  | 9.7595445220  | 11.4361943310 |
| O | 0.0013885300  | 3.8871527440  | 11.2894073270 |
| O | 7.7852865360  | 3.8941498170  | 11.2943442860 |
| O | 3.8907694140  | 3.8900117070  | 11.2874321270 |
| O | 11.6790095830 | 3.8921185860  | 11.2942283870 |
| O | 1.9469454480  | 9.7372956290  | 11.4434914340 |
| O | 9.7283942170  | 9.7528551910  | 11.4345654390 |
| O | 0.0056342220  | 6.3925129910  | 12.2986710410 |
| O | 7.7852342520  | 6.4048648300  | 12.3107945140 |
| O | 1.9373444180  | 0.7128127040  | 12.1960718660 |
| O | 9.7447094720  | 0.7185259890  | 12.1948348010 |
| O | 3.8898903960  | 6.3973276760  | 12.3019201940 |
| O | 11.6740892580 | 6.3984726800  | 12.3041265670 |
| O | 5.8395550330  | 0.7132513970  | 12.2420946750 |
| O | 13.6232291280 | 0.7050676540  | 12.2102150020 |
| O | 1.9446305940  | 3.3173584800  | 13.1590909590 |
| O | 9.7385252030  | 3.3250281390  | 13.1634066460 |
| O | 3.9159889820  | 9.3553378460  | 13.2860522960 |
| O | 11.6617501200 | 9.3450971520  | 13.3164443820 |
| O | -0.0139766210 | 9.3576796870  | 13.2940453700 |
| O | 7.7927660840  | 9.3428488540  | 13.3215798230 |
| O | 5.8369393900  | 3.3364961340  | 13.1599213980 |
| O | 13.6223260470 | 3.3125869640  | 13.1630994620 |
| O | 3.8432487650  | 0.2722877520  | 14.0724980850 |
| O | 11.6832810910 | 0.2494706560  | 14.0771965900 |
| O | 0.0086710170  | 0.2501549760  | 14.0844467110 |
| O | 7.8450489860  | 0.2663173560  | 14.0589136780 |
| O | 1.9178948710  | 10.0401708500 | 16.0091063950 |
| O | 2.4547497530  | 11.0189631250 | 16.8457262540 |
| H | 2.1068695230  | 10.7519894930 | 17.7230818390 |

#### 221-Ce1-HOOH

|    |               |              |              |
|----|---------------|--------------|--------------|
| Ce | 1.9445951940  | 2.4093844220 | 2.8000527150 |
| Ce | 9.7229868580  | 2.4093844220 | 2.8000527150 |
| Ce | 5.8337906370  | 2.4093844220 | 2.8000527150 |
| Ce | 13.6121826120 | 2.4093844220 | 2.8000527150 |

|    |               |               |               |
|----|---------------|---------------|---------------|
| Ce | 0.0000208070  | 10.9489391440 | 3.6444218520  |
| Ce | 7.7784124720  | 10.9489391440 | 3.6444218520  |
| Ce | 3.8892167170  | 10.9489391440 | 3.6444218520  |
| Ce | 11.6676082260 | 10.9489391440 | 3.6444218520  |
| Ce | 1.9445888540  | 7.8041438960  | 4.5298469320  |
| Ce | 9.7229803630  | 7.8041438960  | 4.5298469320  |
| Ce | -1.9446067450 | 7.8041438960  | 4.5298469320  |
| Ce | 5.8337846090  | 7.8041438960  | 4.5298469320  |
| Ce | 0.0000089450  | 4.6047904270  | 5.2434760540  |
| Ce | 7.7784006100  | 4.6047904270  | 5.2434760540  |
| Ce | 3.8892043880  | 4.6047904270  | 5.2434760540  |
| Ce | 11.6675954310 | 4.6047904270  | 5.2434760540  |
| Ce | 5.8337863200  | 1.3053169250  | 6.3566574820  |
| Ce | 13.6121782950 | 1.3053169250  | 6.3566574820  |
| Ce | 1.9445902540  | 1.3053169250  | 6.3566574820  |
| Ce | 9.7229816080  | 1.3053169250  | 6.3566574820  |
| Ce | 3.8891978160  | 9.7009476410  | 7.3076483830  |
| Ce | 11.6675893240 | 9.7009476410  | 7.3076483830  |
| Ce | 0.0000019060  | 9.7009476410  | 7.3076483830  |
| Ce | 7.7783935700  | 9.7009476410  | 7.3076483830  |
| Ce | -1.9445979550 | 6.4819932090  | 8.1585764310  |
| Ce | 5.8337937090  | 6.4819932090  | 8.1585764310  |
| Ce | 1.9445979550  | 6.4819932090  | 8.1585764310  |
| Ce | 9.7229894640  | 6.4819932090  | 8.1585764310  |
| Ce | 0.0016549980  | 3.2715528620  | 9.0070453600  |
| Ce | 7.7737401010  | 3.2667761380  | 9.0070461050  |
| Ce | 3.8938387680  | 3.2639128640  | 9.0125819980  |
| Ce | 11.6698339350 | 3.2689333280  | 9.0061770070  |
| Ce | 1.9369701520  | 0.0067482180  | 9.9679635940  |
| Ce | 9.7312062400  | -0.0003986290 | 9.9688131000  |
| Ce | 5.8323399920  | -0.0167115540 | 10.0192010520 |
| Ce | 13.6135319490 | 0.0087999510  | 9.9612109480  |
| Ce | 0.0002794560  | 8.4081270230  | 11.0908997590 |
| Ce | 7.7706630870  | 8.3794059430  | 11.0738970460 |
| Ce | 3.8805264620  | 8.3665899140  | 10.9983217670 |
| Ce | 11.6578893280 | 8.3906152380  | 11.0773959550 |
| Ce | 1.9415766460  | 5.1987133960  | 11.7982918380 |
| Ce | 9.7210909560  | 5.1818234170  | 11.7979225720 |
| Ce | 5.8378472990  | 5.1732045420  | 11.8085021670 |
| Ce | 13.6135658940 | 5.2073569520  | 11.7939453800 |
| Ce | 0.0027757930  | 2.0701502840  | 12.6675830590 |
| Ce | 7.7963872910  | 2.0144724020  | 12.6674553400 |
| Ce | 3.8762165300  | 2.0575072350  | 12.6895799930 |
| Ce | 11.6912002900 | 2.0681131750  | 12.6703305980 |
| Ce | 1.8877958390  | 10.5641549460 | 13.7152448770 |
| Ce | 9.7633484320  | 10.6193727240 | 13.5389550940 |
| Ce | -1.9666431500 | 10.6215857420 | 13.5407148860 |
| Ce | 5.9528361880  | 10.6245547180 | 13.5611586760 |



|   |               |               |              |
|---|---------------|---------------|--------------|
| O | 0.0000278850  | 1.0936971120  | 2.2401547390 |
| O | 7.7784193940  | 1.0936971120  | 2.2401547390 |
| O | 3.8892236400  | 1.0936971120  | 2.2401547390 |
| O | 11.6676151490 | 1.0936971120  | 2.2401547390 |
| O | 0.0000530100  | 3.6598501530  | 3.0304604640 |
| O | 7.7784442070  | 3.6598501530  | 3.0304604640 |
| O | 3.8892489200  | 3.6598501530  | 3.0304604640 |
| O | 11.6676399620 | 3.6598501530  | 3.0304604640 |
| O | 1.9445652470  | 9.6970730690  | 3.1665399670 |
| O | 9.7229567560  | 9.6970730690  | 3.1665399670 |
| O | -1.9446308190 | 9.6970730690  | 3.1665399670 |
| O | 5.8337610010  | 9.6970730690  | 3.1665399670 |
| O | 1.9445956990  | 0.6173987810  | 4.1099962430 |
| O | 9.7229875190  | 0.6173987810  | 4.1099962430 |
| O | 5.8337917650  | 0.6173987810  | 4.1099962430 |
| O | 13.6121832740 | 0.6173987810  | 4.1099962430 |
| O | 3.8892287350  | 6.6033288830  | 4.0372105540 |
| O | 11.6676205550 | 6.6033288830  | 4.0372105540 |
| O | 0.0000329800  | 6.6033288830  | 4.0372105540 |
| O | 7.7784249560  | 6.6033288830  | 4.0372105540 |
| O | 1.9446021160  | 3.2313913800  | 4.8946937290 |
| O | 9.7229937810  | 3.2313913800  | 4.8946937290 |
| O | 5.8337975600  | 3.2313913800  | 4.8946937290 |
| O | 13.6121886020 | 3.2313913800  | 4.8946937290 |
| O | 0.0000032280  | 9.1016627900  | 5.0340550170 |
| O | 7.7783944260  | 9.1016627900  | 5.0340550170 |
| O | 3.8891991380  | 9.1016627900  | 5.0340550170 |
| O | 11.6675911140 | 9.1016627900  | 5.0340550170 |
| O | 0.0000087900  | 11.6608973020 | 5.8961619820 |
| O | 7.7784002980  | 11.6608973020 | 5.8961619820 |
| O | 13.6122023700 | 5.8211656850  | 5.8086849850 |
| O | 5.8338108610  | 5.8211656850  | 5.8086849850 |
| O | 1.9446152620  | 5.8211656850  | 5.8086849850 |
| O | 9.7230066150  | 5.8211656850  | 5.8086849850 |
| O | 11.6675960530 | 11.6608973020 | 5.8961619820 |
| O | 3.8892045440  | 11.6608973020 | 5.8961619820 |
| O | -0.0000275740 | 2.6100309870  | 6.7405680980 |
| O | 7.7783636230  | 2.6100309870  | 6.7405680980 |
| O | -1.9446299240 | 8.4026813220  | 6.8008587780 |
| O | 5.8337614290  | 8.4026813220  | 6.8008587780 |
| O | 3.8891683360  | 2.6100309870  | 6.7405680980 |
| O | 11.6675603110 | 2.6100309870  | 6.7405680980 |
| O | 1.9445656750  | 8.4026813220  | 6.8008587780 |
| O | 9.7229571830  | 8.4026813220  | 6.8008587780 |
| O | 0.0000562380  | 5.2025083220  | 7.6500997840 |
| O | 7.7784479020  | 5.2025083220  | 7.6500997840 |
| O | 3.8892516810  | 5.2025083220  | 7.6500997840 |
| O | 11.6676427230 | 5.2025083220  | 7.6500997840 |

|   |               |               |               |
|---|---------------|---------------|---------------|
| O | 1.9445942210  | 11.0066060770 | 7.7246176470  |
| O | 9.7229852630  | 11.0066060770 | 7.7246176470  |
| O | -1.9446015330 | 11.0066060770 | 7.7246176470  |
| O | 5.8337895090  | 11.0066060770 | 7.7246176470  |
| O | -0.0024560090 | 7.7724095000  | 8.6612246080  |
| O | 7.7757449140  | 7.7660627440  | 8.6697492940  |
| O | 3.8924780650  | 7.7636911930  | 8.6662038560  |
| O | 11.6641390930 | 7.7631079480  | 8.6739628580  |
| O | 1.9446019220  | 1.9573791750  | 8.5925352150  |
| O | 9.7229938970  | 1.9573791750  | 8.5925352150  |
| O | 5.8337972100  | 1.9573791750  | 8.5925352150  |
| O | 13.6121887180 | 1.9573791750  | 8.5925352150  |
| O | 1.9485006730  | 4.5665685180  | 9.5148717560  |
| O | 9.7183977500  | 4.5733263870  | 9.5172044730  |
| O | 5.8396221270  | 4.5693878070  | 9.5194116930  |
| O | 13.6126669160 | 4.5787767420  | 9.5156132380  |
| O | 0.0222794350  | 10.3550589880 | 9.6228543890  |
| O | 7.7573952840  | 10.3467634530 | 9.6010390170  |
| O | 3.8913512150  | 10.3527800950 | 9.5701700780  |
| O | 11.6498654540 | 10.3693623560 | 9.5698072780  |
| O | -0.0015421160 | 1.3304447590  | 10.4095719970 |
| O | 7.7679045300  | 1.2910139110  | 10.4504343740 |
| O | 3.9020751920  | 1.3230585020  | 10.4281811190 |
| O | 11.6881796640 | 1.3244820470  | 10.3948246810 |
| O | -1.9411776820 | 7.1698690790  | 10.5238494090 |
| O | 5.8288752560  | 7.1538041540  | 10.5065882110 |
| O | 1.9493297950  | 7.1458934920  | 10.4923596380 |
| O | 9.7066754570  | 7.1640740150  | 10.5214336370 |
| O | -2.0039972030 | 9.7654698970  | 11.4121376530 |
| O | 5.7769139190  | 9.7489891280  | 11.4813754670 |
| O | -0.0003902780 | 3.8995320750  | 11.2858431140 |
| O | 7.7824683190  | 3.8657649260  | 11.2895686670 |
| O | 3.8924525870  | 3.9079201370  | 11.2968892630 |
| O | 11.6687659360 | 3.8908906160  | 11.2857091730 |
| O | 2.0366494260  | 9.7014764840  | 11.4974337620 |
| O | 9.7116144730  | 9.7548033880  | 11.4413414040 |
| O | 0.0137169370  | 6.4094843680  | 12.2963303450 |
| O | 7.7666469080  | 6.3935024050  | 12.2943400330 |
| O | 1.9316792770  | 0.7253799270  | 12.1860832810 |
| O | 9.8082942950  | 0.7270725350  | 12.1829540680 |
| O | 3.8880244210  | 6.4345823190  | 12.3441831920 |
| O | 11.6607702550 | 6.3956868030  | 12.2902862090 |
| O | 5.7955326780  | 0.6870438980  | 12.2969805670 |
| O | 13.6260388060 | 0.7238363420  | 12.1998017170 |
| O | 1.9398088920  | 3.3318351650  | 13.1558541520 |
| O | 9.7222322890  | 3.3075512880  | 13.1572342290 |
| O | 3.9433696960  | 9.0692520110  | 13.5724947690 |
| O | 11.6299878300 | 9.3647866240  | 13.3332476270 |

|   |               |               |               |
|---|---------------|---------------|---------------|
| O | -0.0814101260 | 9.4195604440  | 13.2132096030 |
| O | 7.7648985990  | 9.3694906870  | 13.3273777360 |
| O | 5.8448511620  | 3.3118285420  | 13.1588641990 |
| O | 13.6176529090 | 3.3318695960  | 13.1556127840 |
| O | 3.7066257630  | 0.3566591950  | 14.1800881020 |
| O | 11.7290499560 | 0.2772909960  | 14.1080695130 |
| O | -0.0050850460 | 0.2805318140  | 14.0833016590 |
| O | 7.9399694860  | 0.1362290120  | 13.9667676840 |
| O | 1.3781078350  | 10.0365155760 | 15.8301797970 |
| O | 1.5775242800  | 11.4574512660 | 16.0347008920 |
| H | 4.5946405450  | 0.1661350000  | 15.6873004360 |
| H | 3.9342888040  | 8.1232109510  | 13.8175798930 |

### 221-Ce2-OOH

|    |               |               |              |
|----|---------------|---------------|--------------|
| Ce | 1.9445951940  | 2.4093844220  | 2.8000527150 |
| Ce | 9.7229868580  | 2.4093844220  | 2.8000527150 |
| Ce | 5.8337906370  | 2.4093844220  | 2.8000527150 |
| Ce | 13.6121826120 | 2.4093844220  | 2.8000527150 |
| Ce | 0.0000208070  | 10.9489391440 | 3.6444218520 |
| Ce | 7.7784124720  | 10.9489391440 | 3.6444218520 |
| Ce | 3.8892167170  | 10.9489391440 | 3.6444218520 |
| Ce | 11.6676082260 | 10.9489391440 | 3.6444218520 |
| Ce | 1.9445888540  | 7.8041438960  | 4.5298469320 |
| Ce | 9.7229803630  | 7.8041438960  | 4.5298469320 |
| Ce | -1.9446067450 | 7.8041438960  | 4.5298469320 |
| Ce | 5.8337846090  | 7.8041438960  | 4.5298469320 |
| Ce | 0.0000089450  | 4.6047904270  | 5.2434760540 |
| Ce | 7.7784006100  | 4.6047904270  | 5.2434760540 |
| Ce | 3.8892043880  | 4.6047904270  | 5.2434760540 |
| Ce | 11.6675954310 | 4.6047904270  | 5.2434760540 |
| Ce | 5.8337863200  | 1.3053169250  | 6.3566574820 |
| Ce | 13.6121782950 | 1.3053169250  | 6.3566574820 |
| Ce | 1.9445902540  | 1.3053169250  | 6.3566574820 |
| Ce | 9.7229816080  | 1.3053169250  | 6.3566574820 |
| Ce | 3.8891978160  | 9.7009476410  | 7.3076483830 |
| Ce | 11.6675893240 | 9.7009476410  | 7.3076483830 |
| Ce | 0.0000019060  | 9.7009476410  | 7.3076483830 |
| Ce | 7.7783935700  | 9.7009476410  | 7.3076483830 |
| Ce | -1.9445979550 | 6.4819932090  | 8.1585764310 |
| Ce | 5.8337937090  | 6.4819932090  | 8.1585764310 |
| Ce | 1.9445979550  | 6.4819932090  | 8.1585764310 |
| Ce | 9.7229894640  | 6.4819932090  | 8.1585764310 |
| Ce | 0.0005244880  | 3.2657342490  | 9.0102582060 |
| Ce | 7.7782361080  | 3.2664781070  | 9.0111063370 |
| Ce | 3.8886842150  | 3.2589828220  | 9.0213375590 |
| Ce | 11.6676659130 | 3.2650715320  | 9.0105647510 |

|    |               |               |               |
|----|---------------|---------------|---------------|
| Ce | 1.9527108680  | 0.0020156920  | 9.9721564090  |
| Ce | 5.8329205080  | 11.6628284320 | 9.9649703740  |
| Ce | 5.8268804190  | 0.0021766570  | 9.9707243410  |
| Ce | 9.7240589340  | 11.6627183070 | 9.9649859870  |
| Ce | -0.0008858450 | 8.3720474370  | 11.0814778090 |
| Ce | 7.7783787110  | 8.3724443920  | 11.0811750400 |
| Ce | 3.8919012650  | 8.3633709350  | 11.0762619400 |
| Ce | 11.6648139280 | 8.3680321810  | 11.0766443310 |
| Ce | 1.9396545120  | 5.1750082150  | 11.7958812110 |
| Ce | 9.7217843870  | 5.1766804900  | 11.7987963010 |
| Ce | 5.8367564810  | 5.1745468360  | 11.7961554360 |
| Ce | 13.6110324650 | 5.1757775620  | 11.7977870330 |
| Ce | -0.0054858200 | 2.0367241440  | 12.6776659870 |
| Ce | 7.7841605780  | 2.0373900140  | 12.6762138670 |
| Ce | 3.8958515200  | 2.0502325630  | 12.7488402070 |
| Ce | 11.6674253580 | 2.0384601300  | 12.6784794940 |
| Ce | 1.9781610400  | 10.5502919380 | 13.5286694820 |
| Ce | 9.7182320900  | 10.5837407670 | 13.5318921360 |
| Ce | -1.9714746440 | 10.5544306410 | 13.5304532120 |
| Ce | 5.8404919880  | 10.5836617120 | 13.5325702600 |
| O  | 0.0000278850  | 1.0936971120  | 2.2401547390  |
| O  | 7.7784193940  | 1.0936971120  | 2.2401547390  |
| O  | 3.8892236400  | 1.0936971120  | 2.2401547390  |
| O  | 11.6676151490 | 1.0936971120  | 2.2401547390  |
| O  | 0.0000530100  | 3.6598501530  | 3.0304604640  |
| O  | 7.7784442070  | 3.6598501530  | 3.0304604640  |
| O  | 3.8892489200  | 3.6598501530  | 3.0304604640  |
| O  | 11.6676399620 | 3.6598501530  | 3.0304604640  |
| O  | 1.9445652470  | 9.6970730690  | 3.1665399670  |
| O  | 9.7229567560  | 9.6970730690  | 3.1665399670  |
| O  | -1.9446308190 | 9.6970730690  | 3.1665399670  |
| O  | 5.8337610010  | 9.6970730690  | 3.1665399670  |
| O  | 1.9445956990  | 0.6173987810  | 4.1099962430  |
| O  | 9.7229875190  | 0.6173987810  | 4.1099962430  |
| O  | 5.8337917650  | 0.6173987810  | 4.1099962430  |
| O  | 13.6121832740 | 0.6173987810  | 4.1099962430  |
| O  | 3.8892287350  | 6.6033288830  | 4.0372105540  |
| O  | 11.6676205550 | 6.6033288830  | 4.0372105540  |
| O  | 0.0000329800  | 6.6033288830  | 4.0372105540  |
| O  | 7.7784249560  | 6.6033288830  | 4.0372105540  |
| O  | 1.9446021160  | 3.2313913800  | 4.8946937290  |
| O  | 9.7229937810  | 3.2313913800  | 4.8946937290  |
| O  | 5.8337975600  | 3.2313913800  | 4.8946937290  |
| O  | 13.6121886020 | 3.2313913800  | 4.8946937290  |
| O  | 0.0000032280  | 9.1016627900  | 5.0340550170  |
| O  | 7.7783944260  | 9.1016627900  | 5.0340550170  |
| O  | 3.8891991380  | 9.1016627900  | 5.0340550170  |
| O  | 11.6675911140 | 9.1016627900  | 5.0340550170  |

|   |               |               |               |
|---|---------------|---------------|---------------|
| O | 0.0000087900  | 11.6608973020 | 5.8961619820  |
| O | 7.7784002980  | 11.6608973020 | 5.8961619820  |
| O | 13.6122023700 | 5.8211656850  | 5.8086849850  |
| O | 5.8338108610  | 5.8211656850  | 5.8086849850  |
| O | 1.9446152620  | 5.8211656850  | 5.8086849850  |
| O | 9.7230066150  | 5.8211656850  | 5.8086849850  |
| O | 11.6675960530 | 11.6608973020 | 5.8961619820  |
| O | 3.8892045440  | 11.6608973020 | 5.8961619820  |
| O | -0.0000275740 | 2.6100309870  | 6.7405680980  |
| O | 7.7783636230  | 2.6100309870  | 6.7405680980  |
| O | -1.9446299240 | 8.4026813220  | 6.8008587780  |
| O | 5.8337614290  | 8.4026813220  | 6.8008587780  |
| O | 3.8891683360  | 2.6100309870  | 6.7405680980  |
| O | 11.6675603110 | 2.6100309870  | 6.7405680980  |
| O | 1.9445656750  | 8.4026813220  | 6.8008587780  |
| O | 9.7229571830  | 8.4026813220  | 6.8008587780  |
| O | 0.0000562380  | 5.2025083220  | 7.6500997840  |
| O | 7.7784479020  | 5.2025083220  | 7.6500997840  |
| O | 3.8892516810  | 5.2025083220  | 7.6500997840  |
| O | 11.6676427230 | 5.2025083220  | 7.6500997840  |
| O | 1.9445942210  | 11.0066060770 | 7.7246176470  |
| O | 9.7229852630  | 11.0066060770 | 7.7246176470  |
| O | -1.9446015330 | 11.0066060770 | 7.7246176470  |
| O | 5.8337895090  | 11.0066060770 | 7.7246176470  |
| O | -0.0010709240 | 7.7613143300  | 8.6685008020  |
| O | 7.7794165030  | 7.7629488210  | 8.6674515240  |
| O | 3.8903772980  | 7.7620678690  | 8.6696374020  |
| O | 11.6672701250 | 7.7604795320  | 8.6703292960  |
| O | 1.9446019220  | 1.9573791750  | 8.5925352150  |
| O | 9.7229938970  | 1.9573791750  | 8.5925352150  |
| O | 5.8337972100  | 1.9573791750  | 8.5925352150  |
| O | 13.6121887180 | 1.9573791750  | 8.5925352150  |
| O | 1.9493701100  | 4.5639286330  | 9.5205713580  |
| O | 9.7271015300  | 4.5705311580  | 9.5148366280  |
| O | 5.8285736770  | 4.5659642710  | 9.5224702520  |
| O | 13.6085282480 | 4.5685010870  | 9.5146558510  |
| O | -0.0003075540 | 10.3499724230 | 9.5876502300  |
| O | 7.7775259690  | 10.3511218610 | 9.5863274980  |
| O | 3.8910340200  | 10.3565025660 | 9.5812649770  |
| O | 11.6656349250 | 10.3528353040 | 9.5813733500  |
| O | 0.0086344420  | 1.3035011840  | 10.4281701110 |
| O | 7.7709127800  | 1.3081075450  | 10.4284397940 |
| O | 3.8916310270  | 1.3020566020  | 10.4126286790 |
| O | 11.6679919080 | 1.3078431900  | 10.4157552920 |
| O | -1.9453609760 | 7.1515739210  | 10.5203380030 |
| O | 5.8384124430  | 7.1532952210  | 10.5148972020 |
| O | 1.9420513900  | 7.1507360010  | 10.5154691940 |
| O | 9.7197918190  | 7.1541988640  | 10.5188318970 |

|   |               |              |               |
|---|---------------|--------------|---------------|
| O | -1.9549568660 | 9.7418614840 | 11.4359368860 |
| O | 5.8319650940  | 9.7382490280 | 11.4418002720 |
| O | -0.0137239900 | 3.8739214470 | 11.2785372110 |
| O | 7.7936589150  | 3.8767170450 | 11.2794991630 |
| O | 3.8868262480  | 3.8568338220 | 11.3174287890 |
| O | 11.6662050570 | 3.8687071610 | 11.2923829800 |
| O | 1.9559258110  | 9.7382679220 | 11.4352128280 |
| O | 9.7233323170  | 9.7400068850 | 11.4410144540 |
| O | -0.0013112960 | 6.3824039460 | 12.2975814490 |
| O | 7.7799850660  | 6.3848169670 | 12.2985377210 |
| O | 1.9662599190  | 0.6942257980 | 12.2440356920 |
| O | 9.7286214650  | 0.6959083370 | 12.2075748540 |
| O | 3.8912262010  | 6.3805578460 | 12.2873319400 |
| O | 11.6657546420 | 6.3754034840 | 12.2926888200 |
| O | 5.8203813990  | 0.6887338300 | 12.2425870380 |
| O | 13.6065952270 | 0.6968387070 | 12.2077216270 |
| O | 1.8958180380  | 3.3098596200 | 13.1404054960 |
| O | 9.7207633030  | 3.2977151100 | 13.1666505090 |
| O | 3.8864219370  | 9.3196157270 | 13.3222123300 |
| O | 11.6695398310 | 9.3205098430 | 13.3187581560 |
| O | -0.0021153020 | 9.3214956000 | 13.2978722780 |
| O | 7.7779556970  | 9.3456332740 | 13.3223280690 |
| O | 5.8749324500  | 3.3022305740 | 13.1309630010 |
| O | 13.6134402730 | 3.2987196850 | 13.1648977890 |
| O | 3.8959870090  | 0.1361239530 | 14.1312093580 |
| O | 11.6687314300 | 0.2495760730 | 14.0906596030 |
| O | -0.0237890580 | 0.2225187320 | 14.0825544770 |
| O | 7.8061863210  | 0.2222820910 | 14.0864790060 |
| O | 3.7122744960  | 2.4213371340 | 15.2711678870 |
| O | 4.8152445670  | 2.8401590090 | 15.9719594690 |
| H | 4.5313545590  | 2.7283628840 | 16.9063591190 |

## 221-Ce2-HOOH

|    |               |               |              |
|----|---------------|---------------|--------------|
| Ce | 1.9445951940  | 2.4093844220  | 2.8000527150 |
| Ce | 9.7229868580  | 2.4093844220  | 2.8000527150 |
| Ce | 5.8337906370  | 2.4093844220  | 2.8000527150 |
| Ce | 13.6121826120 | 2.4093844220  | 2.8000527150 |
| Ce | 0.0000208070  | 10.9489391440 | 3.6444218520 |
| Ce | 7.7784124720  | 10.9489391440 | 3.6444218520 |
| Ce | 3.8892167170  | 10.9489391440 | 3.6444218520 |
| Ce | 11.6676082260 | 10.9489391440 | 3.6444218520 |
| Ce | 1.9445888540  | 7.8041438960  | 4.5298469320 |
| Ce | 9.7229803630  | 7.8041438960  | 4.5298469320 |
| Ce | -1.9446067450 | 7.8041438960  | 4.5298469320 |
| Ce | 5.8337846090  | 7.8041438960  | 4.5298469320 |
| Ce | 0.0000089450  | 4.6047904270  | 5.2434760540 |

|    |               |               |               |
|----|---------------|---------------|---------------|
| Ce | 7.7784006100  | 4.6047904270  | 5.2434760540  |
| Ce | 3.8892043880  | 4.6047904270  | 5.2434760540  |
| Ce | 11.6675954310 | 4.6047904270  | 5.2434760540  |
| Ce | 5.8337863200  | 1.3053169250  | 6.3566574820  |
| Ce | 13.6121782950 | 1.3053169250  | 6.3566574820  |
| Ce | 1.9445902540  | 1.3053169250  | 6.3566574820  |
| Ce | 9.7229816080  | 1.3053169250  | 6.3566574820  |
| Ce | 3.8891978160  | 9.7009476410  | 7.3076483830  |
| Ce | 11.6675893240 | 9.7009476410  | 7.3076483830  |
| Ce | 0.0000019060  | 9.7009476410  | 7.3076483830  |
| Ce | 7.7783935700  | 9.7009476410  | 7.3076483830  |
| Ce | -1.9445979550 | 6.4819932090  | 8.1585764310  |
| Ce | 5.8337937090  | 6.4819932090  | 8.1585764310  |
| Ce | 1.9445979550  | 6.4819932090  | 8.1585764310  |
| Ce | 9.7229894640  | 6.4819932090  | 8.1585764310  |
| Ce | -0.0005379240 | 3.2672308900  | 9.0108842660  |
| Ce | 7.7801687890  | 3.2667184460  | 9.0126745450  |
| Ce | 3.8890845340  | 3.2611020720  | 9.0250888190  |
| Ce | 11.6674119370 | 3.2668351780  | 9.0095417680  |
| Ce | 1.9514149880  | 0.0104901280  | 9.9704321010  |
| Ce | 5.8365855110  | 11.6645007760 | 9.9613850240  |
| Ce | 5.8343683710  | 0.0015508580  | 9.9654013310  |
| Ce | 9.7239847530  | 11.6657201140 | 9.9618027710  |
| Ce | -0.0002416560 | 8.3848506460  | 11.0811471620 |
| Ce | 7.7794682440  | 8.3723528380  | 11.0834740340 |
| Ce | 3.8935836350  | 8.3714434520  | 11.0756660970 |
| Ce | 11.6674384440 | 8.3796141040  | 11.0804510850 |
| Ce | 1.9293620720  | 5.1978740850  | 11.7997745600 |
| Ce | 9.7267151570  | 5.1801904060  | 11.7989930390 |
| Ce | 5.8384036460  | 5.1771425380  | 11.8077090760 |
| Ce | 13.6092806770 | 5.1826256890  | 11.7960882210 |
| Ce | -0.0236648790 | 2.0392684930  | 12.6779438460 |
| Ce | 7.7972273540  | 2.0364103580  | 12.6750542840 |
| Ce | 3.9386153800  | 2.0285059720  | 12.7333583750 |
| Ce | 11.6667228830 | 2.0371547180  | 12.6766405860 |
| Ce | 1.9583947270  | 10.5643781340 | 13.5266174890 |
| Ce | 9.7236960280  | 10.5814422250 | 13.5291528500 |
| Ce | -1.9404997670 | 10.5852651520 | 13.5210190500 |
| Ce | 5.8372231940  | 10.5816102060 | 13.5296609080 |
| O  | 0.0000278850  | 1.0936971120  | 2.2401547390  |
| O  | 7.7784193940  | 1.0936971120  | 2.2401547390  |
| O  | 3.8892236400  | 1.0936971120  | 2.2401547390  |
| O  | 11.6676151490 | 1.0936971120  | 2.2401547390  |
| O  | 0.0000530100  | 3.6598501530  | 3.0304604640  |
| O  | 7.7784442070  | 3.6598501530  | 3.0304604640  |
| O  | 3.8892489200  | 3.6598501530  | 3.0304604640  |
| O  | 11.6676399620 | 3.6598501530  | 3.0304604640  |
| O  | 1.9445652470  | 9.6970730690  | 3.1665399670  |

|   |               |               |              |
|---|---------------|---------------|--------------|
| O | 9.7229567560  | 9.6970730690  | 3.1665399670 |
| O | -1.9446308190 | 9.6970730690  | 3.1665399670 |
| O | 5.8337610010  | 9.6970730690  | 3.1665399670 |
| O | 1.9445956990  | 0.6173987810  | 4.1099962430 |
| O | 9.7229875190  | 0.6173987810  | 4.1099962430 |
| O | 5.8337917650  | 0.6173987810  | 4.1099962430 |
| O | 13.6121832740 | 0.6173987810  | 4.1099962430 |
| O | 3.8892287350  | 6.6033288830  | 4.0372105540 |
| O | 11.6676205550 | 6.6033288830  | 4.0372105540 |
| O | 0.0000329800  | 6.6033288830  | 4.0372105540 |
| O | 7.7784249560  | 6.6033288830  | 4.0372105540 |
| O | 1.9446021160  | 3.2313913800  | 4.8946937290 |
| O | 9.7229937810  | 3.2313913800  | 4.8946937290 |
| O | 5.8337975600  | 3.2313913800  | 4.8946937290 |
| O | 13.6121886020 | 3.2313913800  | 4.8946937290 |
| O | 0.0000032280  | 9.1016627900  | 5.0340550170 |
| O | 7.7783944260  | 9.1016627900  | 5.0340550170 |
| O | 3.8891991380  | 9.1016627900  | 5.0340550170 |
| O | 11.6675911140 | 9.1016627900  | 5.0340550170 |
| O | 0.0000087900  | 11.6608973020 | 5.8961619820 |
| O | 7.7784002980  | 11.6608973020 | 5.8961619820 |
| O | 13.6122023700 | 5.8211656850  | 5.8086849850 |
| O | 5.8338108610  | 5.8211656850  | 5.8086849850 |
| O | 1.9446152620  | 5.8211656850  | 5.8086849850 |
| O | 9.7230066150  | 5.8211656850  | 5.8086849850 |
| O | 11.6675960530 | 11.6608973020 | 5.8961619820 |
| O | 3.8892045440  | 11.6608973020 | 5.8961619820 |
| O | -0.0000275740 | 2.6100309870  | 6.7405680980 |
| O | 7.7783636230  | 2.6100309870  | 6.7405680980 |
| O | -1.9446299240 | 8.4026813220  | 6.8008587780 |
| O | 5.8337614290  | 8.4026813220  | 6.8008587780 |
| O | 3.8891683360  | 2.6100309870  | 6.7405680980 |
| O | 11.6675603110 | 2.6100309870  | 6.7405680980 |
| O | 1.9445656750  | 8.4026813220  | 6.8008587780 |
| O | 9.7229571830  | 8.4026813220  | 6.8008587780 |
| O | 0.0000562380  | 5.2025083220  | 7.6500997840 |
| O | 7.7784479020  | 5.2025083220  | 7.6500997840 |
| O | 3.8892516810  | 5.2025083220  | 7.6500997840 |
| O | 11.6676427230 | 5.2025083220  | 7.6500997840 |
| O | 1.9445942210  | 11.0066060770 | 7.7246176470 |
| O | 9.7229852630  | 11.0066060770 | 7.7246176470 |
| O | -1.9446015330 | 11.0066060770 | 7.7246176470 |
| O | 5.8337895090  | 11.0066060770 | 7.7246176470 |
| O | -0.0011775670 | 7.7626718630  | 8.6665375520 |
| O | 7.7787946020  | 7.7626718630  | 8.6677461180 |
| O | 3.8930920070  | 7.7594895080  | 8.6698363030 |
| O | 11.6675958960 | 7.7620771990  | 8.6709023440 |
| O | 1.9446019220  | 1.9573791750  | 8.5925352150 |



|   |               |               |               |
|---|---------------|---------------|---------------|
| O | 9.7229938970  | 1.9573791750  | 8.5925352150  |
| O | 5.8337972100  | 1.9573791750  | 8.5925352150  |
| O | 13.6121887180 | 1.9573791750  | 8.5925352150  |
| O | 1.9539913870  | 4.5705832570  | 9.5246967990  |
| O | 9.7277642040  | 4.5727388920  | 9.5133344080  |
| O | 5.8191091270  | 4.5622869090  | 9.5360076980  |
| O | 13.6107260170 | 4.5749014610  | 9.5169624460  |
| O | 0.0008590100  | 10.3578128290 | 9.5838711000  |
| O | 7.7796612890  | 10.3550550190 | 9.5824169110  |
| O | 3.8899857430  | 10.3545265230 | 9.5818255540  |
| O | 11.6683579730 | 10.3590447260 | 9.5833286470  |
| O | 0.0023570620  | 1.3096994850  | 10.4215788700 |
| O | 7.7806144320  | 1.3104331490  | 10.4169699330 |
| O | 3.9028664850  | 1.3105210150  | 10.4225844910 |
| O | 11.6696750670 | 1.3139241920  | 10.4130766910 |
| O | -1.9439071160 | 7.1651009180  | 10.5237052430 |
| O | 5.8418236160  | 7.1512133290  | 10.5185872480 |
| O | 1.9375464600  | 7.1630520450  | 10.5138490170 |
| O | 9.7235717860  | 7.1574907100  | 10.5224265370 |
| O | -1.9467388220 | 9.7646568640  | 11.4333764580 |
| O | 5.8364004330  | 9.7399277340  | 11.4358480280 |
| O | -0.0045577820 | 3.8760121330  | 11.2786853690 |
| O | 7.7975812700  | 3.8799398580  | 11.2796377980 |
| O | 3.8622368070  | 3.8446697640  | 11.3484421300 |
| O | 11.6688750180 | 3.8742701460  | 11.2886593870 |
| O | 1.9484424870  | 9.7447048880  | 11.4337792990 |
| O | 9.7258766150  | 9.7431808240  | 11.4379753670 |
| O | 0.0027925130  | 6.3829171460  | 12.2959686240 |
| O | 7.7774422000  | 6.3812010270  | 12.2992998280 |
| O | 1.9620867000  | 0.7346685200  | 12.2324835080 |
| O | 9.7332552070  | 0.6963752330  | 12.2052120460 |
| O | 3.8859335910  | 6.3855867630  | 12.2683332640 |
| O | 11.6728988310 | 6.3823190570  | 12.2953002070 |
| O | 5.8439267560  | 0.6939913870  | 12.2237007310 |
| O | 13.6046781670 | 0.6960994510  | 12.2072138910 |
| O | 1.8284990610  | 3.3613375150  | 13.2451346380 |
| O | 9.7309367290  | 3.3007568060  | 13.1634549870 |
| O | 3.8885329710  | 9.3303111250  | 13.3108387890 |
| O | 11.6755963210 | 9.3399902500  | 13.3098841670 |
| O | -0.0032653520 | 9.3229806330  | 13.3000332660 |
| O | 7.7811744860  | 9.3394117810  | 13.3166713150 |
| O | 5.8865693810  | 3.2877712320  | 13.1307370420 |
| O | 13.6065618720 | 3.3001908550  | 13.1605486160 |
| O | 3.9130264850  | 0.2012886360  | 14.0734588560 |
| O | 11.6703961970 | 0.2441010650  | 14.0837879370 |
| O | -0.0092716810 | 0.2406275260  | 14.0796805570 |
| O | 7.8050965980  | 0.2310814100  | 14.0829127790 |
| O | 3.2957652920  | 3.1130701850  | 15.2622691650 |

|   |              |              |               |
|---|--------------|--------------|---------------|
| O | 3.8841110820 | 4.4293404340 | 15.5262437550 |
| H | 3.5475602970 | 4.5811899530 | 16.4302704320 |
| H | 2.5321596890 | 3.3579318430 | 14.6029274320 |

221-Ce3-OOH

|    |               |               |               |
|----|---------------|---------------|---------------|
| Ce | 1.9445951940  | 2.4093844220  | 2.8000527150  |
| Ce | 9.7229868580  | 2.4093844220  | 2.8000527150  |
| Ce | 5.8337906370  | 2.4093844220  | 2.8000527150  |
| Ce | 13.6121826120 | 2.4093844220  | 2.8000527150  |
| Ce | 0.0000208070  | 10.9489391440 | 3.6444218520  |
| Ce | 7.7784124720  | 10.9489391440 | 3.6444218520  |
| Ce | 3.8892167170  | 10.9489391440 | 3.6444218520  |
| Ce | 11.6676082260 | 10.9489391440 | 3.6444218520  |
| Ce | 1.9445888540  | 7.8041438960  | 4.5298469320  |
| Ce | 9.7229803630  | 7.8041438960  | 4.5298469320  |
| Ce | -1.9446067450 | 7.8041438960  | 4.5298469320  |
| Ce | 5.8337846090  | 7.8041438960  | 4.5298469320  |
| Ce | 0.0000089450  | 4.6047904270  | 5.2434760540  |
| Ce | 7.7784006100  | 4.6047904270  | 5.2434760540  |
| Ce | 3.8892043880  | 4.6047904270  | 5.2434760540  |
| Ce | 11.6675954310 | 4.6047904270  | 5.2434760540  |
| Ce | 5.8337863200  | 1.3053169250  | 6.3566574820  |
| Ce | 13.6121782950 | 1.3053169250  | 6.3566574820  |
| Ce | 1.9445902540  | 1.3053169250  | 6.3566574820  |
| Ce | 9.7229816080  | 1.3053169250  | 6.3566574820  |
| Ce | 3.8891978160  | 9.7009476410  | 7.3076483830  |
| Ce | 11.6675893240 | 9.7009476410  | 7.3076483830  |
| Ce | 0.0000019060  | 9.7009476410  | 7.3076483830  |
| Ce | 7.7783935700  | 9.7009476410  | 7.3076483830  |
| Ce | -1.9445979550 | 6.4819932090  | 8.1585764310  |
| Ce | 5.8337937090  | 6.4819932090  | 8.1585764310  |
| Ce | 1.9445979550  | 6.4819932090  | 8.1585764310  |
| Ce | 9.7229894640  | 6.4819932090  | 8.1585764310  |
| Ce | 0.0018504530  | 3.2644661460  | 9.0109610870  |
| Ce | 7.7708677210  | 3.2723177050  | 9.0177161710  |
| Ce | 3.8986920260  | 3.2726851080  | 9.0197473380  |
| Ce | 11.6664841290 | 3.2651426800  | 9.0107474440  |
| Ce | 1.9437973100  | -0.0003572710 | 9.9623424270  |
| Ce | 5.8364464450  | 11.6673810250 | 9.9626110120  |
| Ce | 5.8335943460  | 0.0011837920  | 9.9632867530  |
| Ce | 9.7241781700  | 11.6662564250 | 9.9621963770  |
| Ce | -0.0029070850 | 8.3728326740  | 11.0783722690 |
| Ce | 7.7818620610  | 8.3730187750  | 11.0734294430 |
| Ce | 3.8832338780  | 8.3774715470  | 11.0737973340 |
| Ce | 11.6680930740 | 8.3717600920  | 11.0786364400 |
| Ce | 1.9372985610  | 5.1774747580  | 11.7999983950 |

|    |               |               |               |
|----|---------------|---------------|---------------|
| Ce | 9.7279842480  | 5.1797291920  | 11.7974193020 |
| Ce | 5.8408435340  | 5.2012408850  | 11.8583435370 |
| Ce | 13.6116420370 | 5.1753599490  | 11.7987994360 |
| Ce | -0.0002671390 | 2.0350349000  | 12.6809008790 |
| Ce | 7.8007702600  | 2.0239827870  | 12.6837958940 |
| Ce | 3.8763866560  | 2.0270531320  | 12.6857083340 |
| Ce | 11.6743127540 | 2.0367249040  | 12.6821181550 |
| Ce | 1.9461015790  | 10.5709130630 | 13.5225781090 |
| Ce | 9.7244082670  | 10.5832330950 | 13.5288388450 |
| Ce | -1.9466944270 | 10.5741566470 | 13.5281429230 |
| Ce | 5.8393597840  | 10.5724219390 | 13.5234506270 |
| O  | 0.0000278850  | 1.0936971120  | 2.2401547390  |
| O  | 7.7784193940  | 1.0936971120  | 2.2401547390  |
| O  | 3.8892236400  | 1.0936971120  | 2.2401547390  |
| O  | 11.6676151490 | 1.0936971120  | 2.2401547390  |
| O  | 0.0000530100  | 3.6598501530  | 3.0304604640  |
| O  | 7.7784442070  | 3.6598501530  | 3.0304604640  |
| O  | 3.8892489200  | 3.6598501530  | 3.0304604640  |
| O  | 11.6676399620 | 3.6598501530  | 3.0304604640  |
| O  | 1.9445652470  | 9.6970730690  | 3.1665399670  |
| O  | 9.7229567560  | 9.6970730690  | 3.1665399670  |
| O  | -1.9446308190 | 9.6970730690  | 3.1665399670  |
| O  | 5.8337610010  | 9.6970730690  | 3.1665399670  |
| O  | 1.9445956990  | 0.6173987810  | 4.1099962430  |
| O  | 9.7229875190  | 0.6173987810  | 4.1099962430  |
| O  | 5.8337917650  | 0.6173987810  | 4.1099962430  |
| O  | 13.6121832740 | 0.6173987810  | 4.1099962430  |
| O  | 3.8892287350  | 6.6033288830  | 4.0372105540  |
| O  | 11.6676205550 | 6.6033288830  | 4.0372105540  |
| O  | 0.0000329800  | 6.6033288830  | 4.0372105540  |
| O  | 7.7784249560  | 6.6033288830  | 4.0372105540  |
| O  | 1.9446021160  | 3.2313913800  | 4.8946937290  |
| O  | 9.7229937810  | 3.2313913800  | 4.8946937290  |
| O  | 5.8337975600  | 3.2313913800  | 4.8946937290  |
| O  | 13.6121886020 | 3.2313913800  | 4.8946937290  |
| O  | 0.0000032280  | 9.1016627900  | 5.0340550170  |
| O  | 7.7783944260  | 9.1016627900  | 5.0340550170  |
| O  | 3.8891991380  | 9.1016627900  | 5.0340550170  |
| O  | 11.6675911140 | 9.1016627900  | 5.0340550170  |
| O  | 0.0000087900  | 11.6608973020 | 5.8961619820  |
| O  | 7.7784002980  | 11.6608973020 | 5.8961619820  |
| O  | 13.6122023700 | 5.8211656850  | 5.8086849850  |
| O  | 5.8338108610  | 5.8211656850  | 5.8086849850  |
| O  | 1.9446152620  | 5.8211656850  | 5.8086849850  |
| O  | 9.7230066150  | 5.8211656850  | 5.8086849850  |
| O  | 11.6675960530 | 11.6608973020 | 5.8961619820  |
| O  | 3.8892045440  | 11.6608973020 | 5.8961619820  |
| O  | -0.0000275740 | 2.6100309870  | 6.7405680980  |

|   |               |               |               |
|---|---------------|---------------|---------------|
| O | 7.7783636230  | 2.6100309870  | 6.7405680980  |
| O | -1.9446299240 | 8.4026813220  | 6.8008587780  |
| O | 5.8337614290  | 8.4026813220  | 6.8008587780  |
| O | 3.8891683360  | 2.6100309870  | 6.7405680980  |
| O | 11.6675603110 | 2.6100309870  | 6.7405680980  |
| O | 1.9445656750  | 8.4026813220  | 6.8008587780  |
| O | 9.7229571830  | 8.4026813220  | 6.8008587780  |
| O | 0.0000562380  | 5.2025083220  | 7.6500997840  |
| O | 7.7784479020  | 5.2025083220  | 7.6500997840  |
| O | 3.8892516810  | 5.2025083220  | 7.6500997840  |
| O | 11.6676427230 | 5.2025083220  | 7.6500997840  |
| O | 1.9445942210  | 11.0066060770 | 7.7246176470  |
| O | 9.7229852630  | 11.0066060770 | 7.7246176470  |
| O | -1.9446015330 | 11.0066060770 | 7.7246176470  |
| O | 5.8337895090  | 11.0066060770 | 7.7246176470  |
| O | -0.0039183490 | 7.7630878820  | 8.6641398790  |
| O | 7.7731118120  | 7.7617784110  | 8.6716438760  |
| O | 3.8927381190  | 7.7620390060  | 8.6708952740  |
| O | 11.6733523550 | 7.7636928610  | 8.6620563950  |
| O | 1.9446019220  | 1.9573791750  | 8.5925352150  |
| O | 9.7229938970  | 1.9573791750  | 8.5925352150  |
| O | 5.8337972100  | 1.9573791750  | 8.5925352150  |
| O | 13.6121887180 | 1.9573791750  | 8.5925352150  |
| O | 1.9530822820  | 4.5658378560  | 9.5266560130  |
| O | 9.7163646660  | 4.5659369760  | 9.5235418760  |
| O | 5.8355999830  | 4.5701426020  | 9.5147173700  |
| O | 13.6122497940 | 4.5660442280  | 9.5179418070  |
| O | -0.0020690170 | 10.3576441890 | 9.5816113450  |
| O | 7.7809657940  | 10.3548538010 | 9.5818991000  |
| O | 3.8868133720  | 10.3591130480 | 9.5802204840  |
| O | 11.6672583730 | 10.3529412110 | 9.5838022490  |
| O | 0.0012159530  | 1.3098207720  | 10.4157001350 |
| O | 7.7840871110  | 1.3133105760  | 10.4212863820 |
| O | 3.8869865770  | 1.3151564900  | 10.4224345850 |
| O | 11.6709544440 | 1.3111779100  | 10.4162586530 |
| O | -1.9468551140 | 7.1519386210  | 10.5168660860 |
| O | 5.8309803020  | 7.1521739190  | 10.5426604710 |
| O | 1.9291709600  | 7.1599368540  | 10.5057981240 |
| O | 9.7398250120  | 7.1603784490  | 10.5019725500 |
| O | -1.9446367350 | 9.7368925220  | 11.4372253250 |
| O | 5.8329612830  | 9.7441331460  | 11.4325787200 |
| O | -0.0012490010 | 3.8691197020  | 11.2901381560 |
| O | 7.7644845750  | 3.8715715160  | 11.3175293330 |
| O | 3.9132935290  | 3.8737520500  | 11.3204092610 |
| O | 11.6689549830 | 3.8715861270  | 11.2912568650 |
| O | 1.9402452930  | 9.7434634690  | 11.4305139530 |
| O | 9.7249709150  | 9.7419870630  | 11.4399520650 |
| O | -0.0047395440 | 6.3759013240  | 12.2952736800 |

|   |               |              |               |
|---|---------------|--------------|---------------|
| O | 7.8196876530  | 6.3940425770 | 12.2611859570 |
| O | 1.9410455240  | 0.6873308310 | 12.2098888470 |
| O | 9.7345283600  | 0.6902908250 | 12.2086573770 |
| O | 3.8415738520  | 6.3956588460 | 12.2704976360 |
| O | 11.6684962790 | 6.3789510110 | 12.2981071010 |
| O | 5.8369335790  | 0.6862719670 | 12.2114220440 |
| O | 13.6157398680 | 0.6947673750 | 12.2073861650 |
| O | 1.9379118560  | 3.2899358520 | 13.1646578030 |
| O | 9.7318577400  | 3.2901255280 | 13.1696965780 |
| O | 3.8782884550  | 9.3387804260 | 13.3064490350 |
| O | 11.6702889220 | 9.3397659800 | 13.3201713260 |
| O | 0.0049580960  | 9.3349235990 | 13.3129840410 |
| O | 7.7730659130  | 9.3425233830 | 13.3152621710 |
| O | 5.8435982570  | 3.2351609800 | 13.1983768060 |
| O | 13.6131400270 | 3.2993713460 | 13.1664711420 |
| O | 3.8808916490  | 0.2393874190 | 14.0892759620 |
| O | 11.6843507660 | 0.2461208130 | 14.0896627780 |
| O | -0.0010785740 | 0.2465922380 | 14.0898335710 |
| O | 7.8003556600  | 0.2376631340 | 14.0902025490 |
| O | 5.6452173470  | 5.5454915830 | 14.4096644150 |
| O | 6.7324966910  | 5.9844538670 | 15.1122181160 |
| H | 6.4718347890  | 5.8188821580 | 16.0466436060 |

221-Ce3-HOOH

|    |               |               |              |
|----|---------------|---------------|--------------|
| Ce | 1.9445951940  | 2.4093844220  | 2.8000527150 |
| Ce | 9.7229868580  | 2.4093844220  | 2.8000527150 |
| Ce | 5.8337906370  | 2.4093844220  | 2.8000527150 |
| Ce | 13.6121826120 | 2.4093844220  | 2.8000527150 |
| Ce | 0.0000208070  | 10.9489391440 | 3.6444218520 |
| Ce | 7.7784124720  | 10.9489391440 | 3.6444218520 |
| Ce | 3.8892167170  | 10.9489391440 | 3.6444218520 |
| Ce | 11.6676082260 | 10.9489391440 | 3.6444218520 |
| Ce | 1.9445888540  | 7.8041438960  | 4.5298469320 |
| Ce | 9.7229803630  | 7.8041438960  | 4.5298469320 |
| Ce | -1.9446067450 | 7.8041438960  | 4.5298469320 |
| Ce | 5.8337846090  | 7.8041438960  | 4.5298469320 |
| Ce | 0.0000089450  | 4.6047904270  | 5.2434760540 |
| Ce | 7.7784006100  | 4.6047904270  | 5.2434760540 |
| Ce | 3.8892043880  | 4.6047904270  | 5.2434760540 |
| Ce | 11.6675954310 | 4.6047904270  | 5.2434760540 |
| Ce | 5.8337863200  | 1.3053169250  | 6.3566574820 |
| Ce | 13.6121782950 | 1.3053169250  | 6.3566574820 |
| Ce | 1.9445902540  | 1.3053169250  | 6.3566574820 |
| Ce | 9.7229816080  | 1.3053169250  | 6.3566574820 |
| Ce | 3.8891978160  | 9.7009476410  | 7.3076483830 |
| Ce | 11.6675893240 | 9.7009476410  | 7.3076483830 |

|    |               |               |               |
|----|---------------|---------------|---------------|
| Ce | 0.0000019060  | 9.7009476410  | 7.3076483830  |
| Ce | 7.7783935700  | 9.7009476410  | 7.3076483830  |
| Ce | -1.9445979550 | 6.4819932090  | 8.1585764310  |
| Ce | 5.8337937090  | 6.4819932090  | 8.1585764310  |
| Ce | 1.9445979550  | 6.4819932090  | 8.1585764310  |
| Ce | 9.7229894640  | 6.4819932090  | 8.1585764310  |
| Ce | -0.0028354720 | 3.2721464050  | 9.0112917140  |
| Ce | 7.7741814030  | 3.2658427830  | 9.0119660010  |
| Ce | 3.8859507900  | 3.2690614630  | 9.0069443710  |
| Ce | 11.6617573540 | 3.2705631090  | 9.0104433150  |
| Ce | 1.9408396820  | 0.0089038470  | 9.9665598760  |
| Ce | 9.7151832130  | 0.0030249280  | 9.9847768050  |
| Ce | 5.8282864510  | 0.0003862990  | 9.9811406660  |
| Ce | 13.6110177560 | 0.0054905030  | 9.9626583050  |
| Ce | 0.0018480450  | 8.3912829890  | 11.0813255170 |
| Ce | 7.7917057830  | 8.3764480120  | 11.0609264900 |
| Ce | 3.8990701420  | 8.3950953810  | 11.0924451700 |
| Ce | 11.6707451360 | 8.3832331820  | 11.0734021540 |
| Ce | 1.9356465740  | 5.2063369050  | 11.7979703640 |
| Ce | 9.7176728010  | 5.1849094360  | 11.8014724520 |
| Ce | 5.8258528730  | 5.1989217190  | 11.7972461160 |
| Ce | 13.6025151540 | 5.1937960880  | 11.8030562180 |
| Ce | -0.0166211250 | 2.0625150270  | 12.6756668770 |
| Ce | 7.7382768640  | 2.0616536610  | 12.6932261250 |
| Ce | 3.8613397450  | 2.0794719330  | 12.6725371500 |
| Ce | 11.6472886000 | 2.0495629870  | 12.6768923900 |
| Ce | 1.8184543100  | 10.6540971410 | 13.5903742720 |
| Ce | 9.7414455440  | 10.5891019180 | 13.5310767030 |
| Ce | -1.9839352670 | 10.6089810950 | 13.5414509960 |
| Ce | 5.9436397220  | 10.5299528300 | 13.5545218410 |
| O  | 0.0000278850  | 1.0936971120  | 2.2401547390  |
| O  | 7.7784193940  | 1.0936971120  | 2.2401547390  |
| O  | 3.8892236400  | 1.0936971120  | 2.2401547390  |
| O  | 11.6676151490 | 1.0936971120  | 2.2401547390  |
| O  | 0.0000530100  | 3.6598501530  | 3.0304604640  |
| O  | 7.7784442070  | 3.6598501530  | 3.0304604640  |
| O  | 3.8892489200  | 3.6598501530  | 3.0304604640  |
| O  | 11.6676399620 | 3.6598501530  | 3.0304604640  |
| O  | 1.9445652470  | 9.6970730690  | 3.1665399670  |
| O  | 9.7229567560  | 9.6970730690  | 3.1665399670  |
| O  | -1.9446308190 | 9.6970730690  | 3.1665399670  |
| O  | 5.8337610010  | 9.6970730690  | 3.1665399670  |
| O  | 1.9445956990  | 0.6173987810  | 4.1099962430  |
| O  | 9.7229875190  | 0.6173987810  | 4.1099962430  |
| O  | 5.8337917650  | 0.6173987810  | 4.1099962430  |
| O  | 13.6121832740 | 0.6173987810  | 4.1099962430  |
| O  | 3.8892287350  | 6.6033288830  | 4.0372105540  |
| O  | 11.6676205550 | 6.6033288830  | 4.0372105540  |

|   |               |               |              |
|---|---------------|---------------|--------------|
| O | 0.0000329800  | 6.6033288830  | 4.0372105540 |
| O | 7.7784249560  | 6.6033288830  | 4.0372105540 |
| O | 1.9446021160  | 3.2313913800  | 4.8946937290 |
| O | 9.7229937810  | 3.2313913800  | 4.8946937290 |
| O | 5.8337975600  | 3.2313913800  | 4.8946937290 |
| O | 13.6121886020 | 3.2313913800  | 4.8946937290 |
| O | 0.0000032280  | 9.1016627900  | 5.0340550170 |
| O | 7.7783944260  | 9.1016627900  | 5.0340550170 |
| O | 3.8891991380  | 9.1016627900  | 5.0340550170 |
| O | 11.6675911140 | 9.1016627900  | 5.0340550170 |
| O | 0.0000087900  | 11.6608973020 | 5.8961619820 |
| O | 7.7784002980  | 11.6608973020 | 5.8961619820 |
| O | 13.6122023700 | 5.8211656850  | 5.8086849850 |
| O | 5.8338108610  | 5.8211656850  | 5.8086849850 |
| O | 1.9446152620  | 5.8211656850  | 5.8086849850 |
| O | 9.7230066150  | 5.8211656850  | 5.8086849850 |
| O | 11.6675960530 | 11.6608973020 | 5.8961619820 |
| O | 3.8892045440  | 11.6608973020 | 5.8961619820 |
| O | -0.0000275740 | 2.6100309870  | 6.7405680980 |
| O | 7.7783636230  | 2.6100309870  | 6.7405680980 |
| O | -1.9446299240 | 8.4026813220  | 6.8008587780 |
| O | 5.8337614290  | 8.4026813220  | 6.8008587780 |
| O | 3.8891683360  | 2.6100309870  | 6.7405680980 |
| O | 11.6675603110 | 2.6100309870  | 6.7405680980 |
| O | 1.9445656750  | 8.4026813220  | 6.8008587780 |
| O | 9.7229571830  | 8.4026813220  | 6.8008587780 |
| O | 0.0000562380  | 5.2025083220  | 7.6500997840 |
| O | 7.7784479020  | 5.2025083220  | 7.6500997840 |
| O | 3.8892516810  | 5.2025083220  | 7.6500997840 |
| O | 11.6676427230 | 5.2025083220  | 7.6500997840 |
| O | 1.9445942210  | 11.0066060770 | 7.7246176470 |
| O | 9.7229852630  | 11.0066060770 | 7.7246176470 |
| O | -1.9446015330 | 11.0066060770 | 7.7246176470 |
| O | 5.8337895090  | 11.0066060770 | 7.7246176470 |
| O | -0.0010374290 | 7.7657830360  | 8.6729251060 |
| O | 7.7822215110  | 7.7621769430  | 8.6702406060 |
| O | 3.8892671260  | 7.7668231460  | 8.6645348570 |
| O | 11.6714790130 | 7.7674527440  | 8.6713243550 |
| O | 1.9446019220  | 1.9573791750  | 8.5925352150 |
| O | 9.7229938970  | 1.9573791750  | 8.5925352150 |
| O | 5.8337972100  | 1.9573791750  | 8.5925352150 |
| O | 13.6121887180 | 1.9573791750  | 8.5925352150 |
| O | 1.9347225710  | 4.5785228020  | 9.5166629490 |
| O | 9.7206057850  | 4.5717127140  | 9.5185215230 |
| O | 5.8301463980  | 4.5734286830  | 9.5176436100 |
| O | 13.6065572250 | 4.5746731420  | 9.5206234130 |
| O | 0.0022789780  | 10.3570676420 | 9.5948388180 |
| O | 7.7909201040  | 10.3682003610 | 9.5728882300 |

|   |               |               |               |
|---|---------------|---------------|---------------|
| O | 3.8855803270  | 10.3576609760 | 9.6052256980  |
| O | 11.6700072260 | 10.3676298760 | 9.5821222950  |
| O | -0.0048431940 | 1.3303334640  | 10.4199173010 |
| O | 7.7741452690  | 1.3162015540  | 10.4302627290 |
| O | 3.8705523010  | 1.3277315890  | 10.4125718660 |
| O | 11.6433230980 | 1.3162415790  | 10.4411987880 |
| O | -1.9426648080 | 7.1667657930  | 10.5212526640 |
| O | 5.8314186250  | 7.1635978080  | 10.5175767140 |
| O | 1.9426180150  | 7.1788068800  | 10.5235089870 |
| O | 9.7305553510  | 7.1621108210  | 10.5108909760 |
| O | -1.9536920130 | 9.7573586360  | 11.4482258890 |
| O | 5.8908510020  | 9.7497507310  | 11.4196454530 |
| O | -0.0124513210 | 3.8945010860  | 11.2950968930 |
| O | 7.7685735220  | 3.8827047620  | 11.2941838630 |
| O | 3.8726491170  | 3.8949796340  | 11.2849484250 |
| O | 11.6610681550 | 3.8822989650  | 11.2908439570 |
| O | 1.9377807970  | 9.7585266580  | 11.4951050290 |
| O | 9.7320721360  | 9.7565770440  | 11.4323472900 |
| O | -0.0006119370 | 6.4110263900  | 12.2991919430 |
| O | 7.7863540540  | 6.3916351830  | 12.2854284990 |
| O | 1.9254626270  | 0.7196433030  | 12.2131636160 |
| O | 9.6796933920  | 0.6817897520  | 12.2721629180 |
| O | 3.8824837810  | 6.3982583620  | 12.2975314240 |
| O | 11.6687767640 | 6.3944799310  | 12.2913869690 |
| O | 5.7782037060  | 0.7341041930  | 12.1996573190 |
| O | 13.6095555080 | 0.7130639350  | 12.2106447960 |
| O | 1.9288312900  | 3.3245069900  | 13.1615894120 |
| O | 9.7221744900  | 3.3124104190  | 13.1627088240 |
| O | 4.0220860130  | 9.3146287150  | 13.2821716070 |
| O | 11.6581573350 | 9.3486935960  | 13.3242463080 |
| O | -0.0342524250 | 9.3840938780  | 13.3488134910 |
| O | 7.8173098570  | 9.3166497120  | 13.3257788420 |
| O | 5.8099663680  | 3.3404180520  | 13.1577162920 |
| O | 13.5946886340 | 3.3128552930  | 13.1628697000 |
| O | 3.8526577590  | 0.2841880200  | 14.1021220030 |
| O | 11.6810764480 | 0.2224817560  | 14.0769639490 |
| O | -0.0081480080 | 0.2560430410  | 14.0888843010 |
| O | 7.5519008320  | 0.3808914620  | 14.1773495490 |
| O | 3.3352347730  | 9.5151940590  | 15.6638283760 |
| O | 4.4512262400  | 10.4396098650 | 15.9070755670 |
| H | 4.0856518670  | 11.2791598850 | 15.3925441110 |
| H | 3.6616031330  | 9.1322406520  | 14.7461366310 |

### 331-Ce1-OOH

|    |               |              |              |
|----|---------------|--------------|--------------|
| Ce | -0.0000000020 | 6.9507133630 | 2.3670970170 |
| Ce | 3.8891956530  | 6.9507207260 | 2.3670759380 |



|    |               |               |               |
|----|---------------|---------------|---------------|
| Ce | 1.9445977200  | 15.4270460790 | 2.3670955860  |
| Ce | -1.9445979550 | 15.4270460790 | 2.3670955860  |
| Ce | -0.0000000020 | 12.4228856140 | 3.5203780730  |
| Ce | 3.8891961160  | 12.4228886680 | 3.5203753370  |
| Ce | 1.9445982560  | 3.9465691430  | 3.5203870530  |
| Ce | 5.8337936290  | 3.9465691430  | 3.5203870530  |
| Ce | -1.9445991460 | 9.3609901900  | 4.5898474610  |
| Ce | 1.9445994620  | 9.3609901900  | 4.5898474610  |
| Ce | -0.0000000020 | 0.8846764880  | 4.5898703710  |
| Ce | 3.8891960310  | 0.8846819140  | 4.5898688270  |
| Ce | 1.9445974610  | 14.7231392280 | 6.0359420990  |
| Ce | -1.9445975780 | 14.7231392280 | 6.0359420990  |
| Ce | 3.8891960020  | 6.2468290920  | 6.0359347630  |
| Ce | -0.0000000000 | 6.2468342360  | 6.0359376290  |
| Ce | 3.8891958870  | 11.5628706430 | 7.2731916820  |
| Ce | 0.0000000000  | 11.5628681570 | 7.2731922510  |
| Ce | 5.8337918010  | 3.0865645100  | 7.2732007650  |
| Ce | 1.9446000880  | 3.0865645100  | 7.2732007650  |
| Ce | -1.9479292680 | 8.5141432230  | 8.4977807740  |
| Ce | 1.9466983210  | 8.5139431000  | 8.4990033500  |
| Ce | 0.0001506330  | 0.0374451790  | 8.5003084350  |
| Ce | 3.8892976350  | 0.0364803390  | 8.4989984060  |
| Ce | 1.9448013860  | 13.8343838260 | 9.7367828650  |
| Ce | 3.8873830310  | 5.3539990550  | 9.7628581980  |
| Ce | -1.9447460450 | 13.8336043160 | 9.7365941570  |
| Ce | -0.0001568290 | 5.3572068840  | 9.7367505000  |
| Ce | -0.000099960  | 10.7154445430 | 11.1770460270 |
| Ce | 1.9498206420  | 2.2555958370  | 11.1695400480 |
| Ce | 3.8884264940  | 10.7152149080 | 11.1808631390 |
| Ce | 5.8299339100  | 2.2563600060  | 11.1689717310 |
| Ce | 3.8911417680  | 16.1387333790 | 12.2593689540 |
| Ce | 1.9447080890  | 7.6475529060  | 12.2448833630 |
| Ce | -0.0009608690 | 16.1370584960 | 12.2577212010 |
| Ce | 5.8314622210  | 7.6474578840  | 12.2382645720 |
| Ce | 1.9433939390  | 13.1337930640 | 13.4032313800 |
| Ce | -1.9444601030 | 13.1321616220 | 13.4033920180 |
| Ce | 0.0011486030  | 4.6603246910  | 13.4126449430 |
| Ce | 3.8822114310  | 4.6219201300  | 13.5070305740 |
| O  | 1.9445887870  | 5.5490558700  | 1.9335942950  |
| O  | 3.8891958830  | 14.0253876620 | 1.9336029210  |
| O  | -0.0000000030 | 14.0253887860 | 1.9336008020  |
| O  | 5.8338029790  | 5.5490558700  | 1.9335942950  |
| O  | 1.9445908170  | 8.1935857730  | 2.4635064340  |
| O  | 5.8338009510  | 8.1935857730  | 2.4635064340  |
| O  | -0.0000000030 | 16.6699198080 | 2.4635100400  |
| O  | 3.8891958840  | 16.6699191890 | 2.4635187780  |
| O  | 1.9445985820  | 11.1825729010 | 3.1763256020  |
| O  | -1.9445985870 | 11.1825729010 | 3.1763256020  |

|   |               |               |               |
|---|---------------|---------------|---------------|
| O | 3.8891958840  | 2.7062566780  | 3.1763346120  |
| O | -0.0000000030 | 2.7062551340  | 3.1763349690  |
| O | 1.9445949560  | 13.8336284430 | 3.8696194020  |
| O | -1.9445949580 | 13.8336284430 | 3.8696194020  |
| O | 3.8891958860  | 5.3573044120  | 3.8696200540  |
| O | -0.0000000010 | 5.3573111040  | 3.8696153590  |
| O | 1.9445953790  | 16.4701576290 | 4.3638358960  |
| O | -1.9445952660 | 16.4701576290 | 4.3638358960  |
| O | 3.8891957690  | 7.9938543410  | 4.3638299020  |
| O | -0.0000000020 | 7.9938460830  | 4.3638247910  |
| O | 5.8337950840  | 2.1685343300  | 5.0305281930  |
| O | 1.9445964570  | 2.1685343300  | 5.0305281930  |
| O | -0.0000000010 | 10.6448420120 | 5.0305093800  |
| O | 3.8891958860  | 10.6448400810 | 5.0305102620  |
| O | 1.9446010490  | 4.8520739810  | 5.6962716020  |
| O | 5.8337907230  | 4.8520739810  | 5.6962716020  |
| O | 3.8891956540  | 13.3283842090 | 5.6962689610  |
| O | -0.0000000020 | 13.3283816710 | 5.6962746390  |
| O | 3.8891956540  | 16.0624346680 | 6.2752528180  |
| O | -0.0000000000 | 16.0624317930 | 6.2752523580  |
| O | 5.8337916220  | 7.5861299260  | 6.2752432660  |
| O | 1.9446001510  | 7.5861299260  | 6.2752432660  |
| O | 1.9445965700  | 10.2543739410 | 6.9222146910  |
| O | -1.9445968610 | 10.2543739410 | 6.9222146910  |
| O | 3.8891957130  | 1.7780622010  | 6.9222298330  |
| O | -0.0000000000 | 1.7780609630  | 6.9222314740  |
| O | 1.9445987410  | 12.9360348810 | 7.5912439110  |
| O | -1.9445989730 | 12.9360348810 | 7.5912439110  |
| O | 3.8891956550  | 4.4597271670  | 7.5912502650  |
| O | 0.0000000000  | 4.4597250260  | 7.5912453510  |
| O | 3.8885596110  | 7.1407187480  | 8.1831225120  |
| O | 1.9446140680  | 15.6171285240 | 8.1816098310  |
| O | -1.9444757450 | 15.6172629480 | 8.1817272100  |
| O | -0.0011419750 | 7.1393509420  | 8.1823999170  |
| O | 3.8886932890  | 9.8284831200  | 8.8493791170  |
| O | -0.0001799520 | 9.8251023070  | 8.8474183910  |
| O | 5.8350074840  | 1.3486021340  | 8.8504570990  |
| O | 1.9439336630  | 1.3494665290  | 8.8520323840  |
| O | 3.8894943550  | 12.4987211000 | 9.4961972660  |
| O | -0.0004087150 | 12.4952810140 | 9.4953535110  |
| O | 1.9445768980  | 4.0176473920  | 9.4987628290  |
| O | 5.8329155970  | 4.0181947450  | 9.4994368220  |
| O | 0.0000587780  | 15.2274648220 | 10.0785693390 |
| O | 5.8222760520  | 6.7524003620  | 10.0789031340 |
| O | 1.9535576220  | 6.7534817050  | 10.0775518520 |
| O | 3.8893503300  | 15.2325583510 | 10.0804063270 |
| O | 1.9439202310  | 9.4361463460  | 10.7359160230 |
| O | 3.8899656570  | 0.9401547580  | 10.7416107710 |

|   |               |               |               |
|---|---------------|---------------|---------------|
| O | 0.0001392400  | 0.9485508110  | 10.7466950050 |
| O | -1.9451074980 | 9.4349571500  | 10.7334502730 |
| O | 3.8874715720  | 3.5906635640  | 11.4078016600 |
| O | 0.0028351270  | 3.6120763000  | 11.4001699270 |
| O | 1.9447040130  | 12.0923462880 | 11.4077372920 |
| O | -1.9450193370 | 12.0891636200 | 11.4088220690 |
| O | -1.9443396740 | 14.7336341480 | 11.9049277430 |
| O | 1.9444922210  | 14.7372710670 | 11.9055173240 |
| O | 3.8833247690  | 6.2390128820  | 11.9403529280 |
| O | 0.0023995560  | 6.2504610760  | 11.8727827510 |
| O | -0.0019273010 | 8.8990376360  | 12.5873252850 |
| O | 5.8330818730  | 0.4341893590  | 12.6196877120 |
| O | 1.9464825030  | 0.4324066860  | 12.6160637860 |
| O | 3.8893602590  | 8.9048454320  | 12.5893713740 |
| O | 3.8883026200  | 11.8982051630 | 13.3092881150 |
| O | 0.0008861180  | 11.8941830720 | 13.3078173950 |
| O | 5.8452789670  | 3.3727205500  | 13.2824217390 |
| O | 1.9391624040  | 3.3819209160  | 13.2967911000 |
| O | 0.0001009040  | 14.5377455390 | 13.8367405090 |
| O | 3.8904581120  | 14.5418461480 | 13.8367595760 |
| O | 5.8914404500  | 6.0151520310  | 13.7876729080 |
| O | 1.8803630200  | 6.0313588060  | 13.8135447550 |
| O | 3.9183465100  | 4.4774768680  | 15.9628543840 |
| O | 4.7313005650  | 5.3883124000  | 16.6410021960 |
| H | 4.4324782940  | 5.2762549100  | 17.5681101950 |

### 331-Ce1-HOOH

|    |               |               |              |
|----|---------------|---------------|--------------|
| Ce | -0.0000000000 | 6.9507100000  | 2.3671000000 |
| Ce | 3.8892000000  | 6.9507200000  | 2.3670800000 |
| Ce | 1.9446000000  | 15.4270500000 | 2.3671000000 |
| Ce | -1.9446000000 | 15.4270500000 | 2.3671000000 |
| Ce | 0.0000000000  | 12.4228900000 | 3.5203800000 |
| Ce | 3.8892000000  | 12.4228900000 | 3.5203800000 |
| Ce | 1.9446000000  | 3.9465700000  | 3.5203900000 |
| Ce | 5.8337900000  | 3.9465700000  | 3.5203900000 |
| Ce | -1.9446000000 | 9.3609900000  | 4.5898500000 |
| Ce | 1.9446000000  | 9.3609900000  | 4.5898500000 |
| Ce | -0.0000000000 | 0.8846800000  | 4.5898700000 |
| Ce | 3.8892000000  | 0.8846800000  | 4.5898700000 |
| Ce | 1.9446000000  | 14.7231400000 | 6.0359400000 |
| Ce | -1.9446000000 | 14.7231400000 | 6.0359400000 |
| Ce | 3.8892000000  | 6.2468300000  | 6.0359300000 |
| Ce | 0.0000000000  | 6.2468300000  | 6.0359400000 |
| Ce | 3.8892000000  | 11.5628700000 | 7.2731900000 |
| Ce | -0.0000000000 | 11.5628700000 | 7.2731900000 |
| Ce | 5.8337900000  | 3.0865600000  | 7.2732000000 |

|    |               |               |               |
|----|---------------|---------------|---------------|
| Ce | 1.944600000   | 3.086560000   | 7.273200000   |
| Ce | -1.9491216610 | 8.5120332150  | 8.4966403250  |
| Ce | 1.9438939410  | 8.5096864380  | 8.4999714580  |
| Ce | 0.0015653970  | 0.0319169810  | 8.4948148900  |
| Ce | 3.8889701010  | 0.0317127240  | 8.4975636160  |
| Ce | 1.9477856410  | 13.8298086600 | 9.7351852060  |
| Ce | 3.8838203020  | 5.3501589050  | 9.7516518700  |
| Ce | -1.9433446680 | 13.8286222870 | 9.7355220940  |
| Ce | -0.0023403210 | 5.3446238720  | 9.7373670110  |
| Ce | 0.0032140370  | 10.7191496020 | 11.1726573910 |
| Ce | 1.9441242000  | 2.2319287590  | 11.1656010040 |
| Ce | 3.8920113640  | 10.7182676730 | 11.1739738170 |
| Ce | 5.8427970420  | 2.2251224890  | 11.1595215320 |
| Ce | 3.8892674650  | 16.1272798300 | 12.2543876570 |
| Ce | 1.9283658550  | 7.6575302050  | 12.2586173930 |
| Ce | -0.0003491300 | 16.1254158480 | 12.2485597140 |
| Ce | 5.8238738510  | 7.6582531540  | 12.2420770380 |
| Ce | 1.9509102650  | 13.1221592150 | 13.4044471380 |
| Ce | -1.9365848250 | 13.1219377160 | 13.4058664300 |
| Ce | 0.0059017540  | 4.6728303850  | 13.4196059440 |
| Ce | 3.9232013410  | 4.5552667240  | 13.4255553590 |
| O  | 1.9445900000  | 5.5490600000  | 1.9335900000  |
| O  | 3.8892000000  | 14.0253900000 | 1.9336000000  |
| O  | -0.0000000000 | 14.0253900000 | 1.9336000000  |
| O  | 5.8338000000  | 5.5490600000  | 1.9335900000  |
| O  | 1.9445900000  | 8.1935900000  | 2.4635100000  |
| O  | 5.8338000000  | 8.1935900000  | 2.4635100000  |
| O  | -0.0000000000 | 16.6699200000 | 2.4635100000  |
| O  | 3.8892000000  | 16.6699200000 | 2.4635200000  |
| O  | 1.9446000000  | 11.1825700000 | 3.1763300000  |
| O  | -1.9446000000 | 11.1825700000 | 3.1763300000  |
| O  | 3.8892000000  | 2.7062600000  | 3.1763300000  |
| O  | -0.0000000000 | 2.7062600000  | 3.1763300000  |
| O  | 1.9445900000  | 13.8336300000 | 3.8696200000  |
| O  | -1.9445900000 | 13.8336300000 | 3.8696200000  |
| O  | 3.8892000000  | 5.3573000000  | 3.8696200000  |
| O  | 0.0000000000  | 5.3573100000  | 3.8696200000  |
| O  | 1.9446000000  | 16.4701600000 | 4.3638400000  |
| O  | -1.9446000000 | 16.4701600000 | 4.3638400000  |
| O  | 3.8892000000  | 7.9938500000  | 4.3638300000  |
| O  | -0.0000000000 | 7.9938500000  | 4.3638200000  |
| O  | 5.8338000000  | 2.1685300000  | 5.0305300000  |
| O  | 1.9446000000  | 2.1685300000  | 5.0305300000  |
| O  | 0.0000000000  | 10.6448400000 | 5.0305100000  |
| O  | 3.8892000000  | 10.6448400000 | 5.0305100000  |
| O  | 1.9446000000  | 4.8520700000  | 5.6962700000  |
| O  | 5.8337900000  | 4.8520700000  | 5.6962700000  |
| O  | 3.8892000000  | 13.3283800000 | 5.6962700000  |

|   |               |               |               |
|---|---------------|---------------|---------------|
| O | 0.000000000   | 13.328380000  | 5.696270000   |
| O | 3.889200000   | 16.062430000  | 6.275250000   |
| O | -0.000000000  | 16.062430000  | 6.275250000   |
| O | 5.833790000   | 7.586130000   | 6.275240000   |
| O | 1.944600000   | 7.586130000   | 6.275240000   |
| O | 1.944600000   | 10.254370000  | 6.922210000   |
| O | -1.944600000  | 10.254370000  | 6.922210000   |
| O | 3.889200000   | 1.778060000   | 6.922230000   |
| O | -0.000000000  | 1.778060000   | 6.922230000   |
| O | 1.944600000   | 12.936030000  | 7.591240000   |
| O | -1.944600000  | 12.936030000  | 7.591240000   |
| O | 3.889200000   | 4.459730000   | 7.591250000   |
| O | -0.000000000  | 4.459730000   | 7.591250000   |
| O | 3.8837170580  | 7.1358195790  | 8.1849434260  |
| O | 1.9450834770  | 15.6157607390 | 8.1802748370  |
| O | -1.9434959230 | 15.6157341270 | 8.1799103360  |
| O | -0.0050650570 | 7.1312366680  | 8.1897685820  |
| O | 3.8884401420  | 9.8198291950  | 8.8495961630  |
| O | -0.0003212990 | 9.8177795090  | 8.8477832690  |
| O | 5.8347126820  | 1.3471549660  | 8.8507910570  |
| O | 1.9453116130  | 1.3493593840  | 8.8501043910  |
| O | 3.8942132780  | 12.4904977840 | 9.4949811670  |
| O | 0.0025206500  | 12.4865996460 | 9.4931702210  |
| O | 1.9413900830  | 4.0178077400  | 9.4951130100  |
| O | 5.8410026240  | 4.0180677200  | 9.4924347840  |
| O | -0.0000086290 | 15.2146021490 | 10.0737929400 |
| O | 5.8063611830  | 6.7507063390  | 10.0887033220 |
| O | 1.9519269600  | 6.7492018770  | 10.0913897900 |
| O | 3.8905482030  | 15.2204880550 | 10.0764084690 |
| O | 1.9439569520  | 9.4305708590  | 10.7413324480 |
| O | 3.8883610280  | 0.9289640110  | 10.7306846690 |
| O | 0.0028533720  | 0.9416970100  | 10.7310559390 |
| O | -1.9466761890 | 9.4330804380  | 10.7350419570 |
| O | 3.9018648270  | 3.5611882590  | 11.3706954010 |
| O | 0.0053270910  | 3.5932933880  | 11.4124721480 |
| O | 1.9523406010  | 12.0819572920 | 11.4011526630 |
| O | -1.9365561970 | 12.0822283840 | 11.4048791300 |
| O | -1.9441623680 | 14.7183169690 | 11.9036057160 |
| O | 1.9439567140  | 14.7188018520 | 11.9011929420 |
| O | 3.8737608650  | 6.1964902670  | 11.9626196510 |
| O | -0.0172370900 | 6.2353318860  | 11.8867670540 |
| O | -0.0100642390 | 8.8901856660  | 12.5825590630 |
| O | 5.8352118450  | 0.4211430550  | 12.5919758580 |
| O | 1.9431919720  | 0.4253742470  | 12.5943427800 |
| O | 3.8891985040  | 8.8778203330  | 12.5826138090 |
| O | 3.8998211510  | 11.8804129160 | 13.2944860560 |
| O | 0.0131992050  | 11.8812810670 | 13.2946810600 |
| O | 5.8348477520  | 3.4102654610  | 13.2986705010 |

|   |               |               |               |
|---|---------------|---------------|---------------|
| O | 1.9696924060  | 3.4463293570  | 13.2920031530 |
| O | -0.0025340700 | 14.5193110470 | 13.8314707770 |
| O | 3.8838852870  | 14.5221381890 | 13.8339331700 |
| O | 5.8949017370  | 6.0841092070  | 13.8985165940 |
| O | 1.7901175590  | 6.1400464120  | 13.9247943700 |
| O | 3.5309105640  | 5.5940611710  | 15.7615027650 |
| O | 4.5254830620  | 6.6062479130  | 16.1204547730 |
| H | 5.1680653200  | 6.5009369690  | 15.3383680700 |
| H | 2.7793067200  | 6.1078948400  | 15.3055030620 |

### 331-Ce2-OOH

|    |               |               |               |
|----|---------------|---------------|---------------|
| Ce | -0.0000000020 | 6.9507133630  | 2.3670970170  |
| Ce | 3.8891956530  | 6.9507207260  | 2.3670759380  |
| Ce | 1.9445977200  | 15.4270460790 | 2.3670955860  |
| Ce | -1.9445979550 | 15.4270460790 | 2.3670955860  |
| Ce | -0.0000000020 | 12.4228856140 | 3.5203780730  |
| Ce | 3.8891961160  | 12.4228886680 | 3.5203753370  |
| Ce | 1.9445982560  | 3.9465691430  | 3.5203870530  |
| Ce | 5.8337936290  | 3.9465691430  | 3.5203870530  |
| Ce | -1.9445991460 | 9.3609901900  | 4.5898474610  |
| Ce | 1.9445994620  | 9.3609901900  | 4.5898474610  |
| Ce | -0.0000000020 | 0.8846764880  | 4.5898703710  |
| Ce | 3.8891960310  | 0.8846819140  | 4.5898688270  |
| Ce | 1.9445974610  | 14.7231392280 | 6.0359420990  |
| Ce | -1.9445975780 | 14.7231392280 | 6.0359420990  |
| Ce | 3.8891960020  | 6.2468290920  | 6.0359347630  |
| Ce | -0.0000000000 | 6.2468342360  | 6.0359376290  |
| Ce | 3.8891958870  | 11.5628706430 | 7.2731916820  |
| Ce | 0.0000000000  | 11.5628681570 | 7.2731922510  |
| Ce | 5.8337918010  | 3.0865645100  | 7.2732007650  |
| Ce | 1.9446000880  | 3.0865645100  | 7.2732007650  |
| Ce | -1.9460959600 | 8.5116619990  | 8.4997417180  |
| Ce | 1.9429439320  | 8.5064362620  | 8.5074486830  |
| Ce | 0.0015098410  | 0.0320604950  | 8.4963363160  |
| Ce | 3.8879338540  | 0.0322420790  | 8.4966160050  |
| Ce | 1.9437719620  | 13.8246450490 | 9.7334851630  |
| Ce | 3.8815528980  | 5.3552264820  | 9.7410125130  |
| Ce | -1.9451486290 | 13.8263552350 | 9.7333178510  |
| Ce | 0.0059729730  | 5.3546906380  | 9.7419571500  |
| Ce | -0.0061631210 | 10.7067974910 | 11.1670900510 |
| Ce | 1.9455696780  | 2.2285082530  | 11.1747216170 |
| Ce | 3.8878767710  | 10.7065604410 | 11.1660226750 |
| Ce | 5.8361742930  | 2.2176401000  | 11.1594422940 |
| Ce | 3.8895589910  | 16.1151913920 | 12.2506992970 |
| Ce | 1.9427619780  | 7.6683092150  | 12.3165664400 |
| Ce | 0.0004281710  | 16.1153852230 | 12.2507477690 |

|    |               |               |               |
|----|---------------|---------------|---------------|
| Ce | 5.8277825810  | 7.6450138120  | 12.2423367220 |
| Ce | 1.9432926090  | 13.1025695460 | 13.3953497570 |
| Ce | -1.9460473520 | 13.1095193140 | 13.3978940120 |
| Ce | -0.0237273500 | 4.6133779440  | 13.4053817480 |
| Ce | 3.9225770600  | 4.6044846510  | 13.4019392360 |
| O  | 1.9445887870  | 5.5490558700  | 1.9335942950  |
| O  | 3.8891958830  | 14.0253876620 | 1.9336029210  |
| O  | -0.0000000030 | 14.0253887860 | 1.9336008020  |
| O  | 5.8338029790  | 5.5490558700  | 1.9335942950  |
| O  | 1.9445908170  | 8.1935857730  | 2.4635064340  |
| O  | 5.8338009510  | 8.1935857730  | 2.4635064340  |
| O  | -0.0000000030 | 16.6699198080 | 2.4635100400  |
| O  | 3.8891958840  | 16.6699191890 | 2.4635187780  |
| O  | 1.9445985820  | 11.1825729010 | 3.1763256020  |
| O  | -1.9445985870 | 11.1825729010 | 3.1763256020  |
| O  | 3.8891958840  | 2.7062566780  | 3.1763346120  |
| O  | -0.0000000030 | 2.7062551340  | 3.1763349690  |
| O  | 1.9445949560  | 13.8336284430 | 3.8696194020  |
| O  | -1.9445949580 | 13.8336284430 | 3.8696194020  |
| O  | 3.8891958860  | 5.3573044120  | 3.8696200540  |
| O  | -0.0000000010 | 5.3573111040  | 3.8696153590  |
| O  | 1.9445953790  | 16.4701576290 | 4.3638358960  |
| O  | -1.9445952660 | 16.4701576290 | 4.3638358960  |
| O  | 3.8891957690  | 7.9938543410  | 4.3638299020  |
| O  | -0.0000000020 | 7.9938460830  | 4.3638247910  |
| O  | 5.8337950840  | 2.1685343300  | 5.0305281930  |
| O  | 1.9445964570  | 2.1685343300  | 5.0305281930  |
| O  | -0.0000000010 | 10.6448420120 | 5.0305093800  |
| O  | 3.8891958860  | 10.6448400810 | 5.0305102620  |
| O  | 1.9446010490  | 4.8520739810  | 5.6962716020  |
| O  | 5.8337907230  | 4.8520739810  | 5.6962716020  |
| O  | 3.8891956540  | 13.3283842090 | 5.6962689610  |
| O  | -0.0000000020 | 13.3283816710 | 5.6962746390  |
| O  | 3.8891956540  | 16.0624346680 | 6.2752528180  |
| O  | -0.0000000000 | 16.0624317930 | 6.2752523580  |
| O  | 5.8337916220  | 7.5861299260  | 6.2752432660  |
| O  | 1.9446001510  | 7.5861299260  | 6.2752432660  |
| O  | 1.9445965700  | 10.2543739410 | 6.9222146910  |
| O  | -1.9445968610 | 10.2543739410 | 6.9222146910  |
| O  | 3.8891957130  | 1.7780622010  | 6.9222298330  |
| O  | -0.0000000000 | 1.7780609630  | 6.9222314740  |
| O  | 1.9445987410  | 12.9360348810 | 7.5912439110  |
| O  | -1.9445989730 | 12.9360348810 | 7.5912439110  |
| O  | 3.8891956550  | 4.4597271670  | 7.5912502650  |
| O  | 0.0000000000  | 4.4597250260  | 7.5912453510  |
| O  | 3.8953500610  | 7.1369281740  | 8.1821107670  |
| O  | 1.9444931950  | 15.6142194490 | 8.1779965970  |
| O  | -1.9446802110 | 15.6135618570 | 8.1781798240  |

|   |               |               |               |
|---|---------------|---------------|---------------|
| O | -0.0089587860 | 7.1363754350  | 8.1840188890  |
| O | 3.8765294480  | 9.8198541220  | 8.8499789830  |
| O | 0.0084544940  | 9.8198598300  | 8.8494792980  |
| O | 5.8342160490  | 1.3423587170  | 8.8486933470  |
| O | 1.9449662010  | 1.3445019060  | 8.8483308850  |
| O | 3.8897783270  | 12.4884810230 | 9.4883093100  |
| O | -0.0030104450 | 12.4886448450 | 9.4881862440  |
| O | 1.9445374310  | 4.0109383670  | 9.4997487050  |
| O | 5.8355149910  | 4.0134061860  | 9.4891607420  |
| O | -0.0003586160 | 15.2187098100 | 10.0736436210 |
| O | 5.8293822450  | 6.7405573090  | 10.0939532390 |
| O | 1.9445885690  | 6.7453741430  | 10.0716605320 |
| O | 3.8893175760  | 15.2185052520 | 10.0735285690 |
| O | 1.9389760540  | 9.4163772360  | 10.7692714480 |
| O | 3.8877443970  | 0.9402007100  | 10.7360535760 |
| O | 0.0031211840  | 0.9401424750  | 10.7356225300 |
| O | -1.9481910960 | 9.4281829680  | 10.7108247650 |
| O | 3.9027824760  | 3.5927586840  | 11.3965741350 |
| O | -0.0080300150 | 3.5937187400  | 11.4010266380 |
| O | 1.9417696220  | 12.0733530710 | 11.3944140020 |
| O | -1.9469255820 | 12.0760169550 | 11.3968020390 |
| O | -1.9443999630 | 14.7114229470 | 11.9004361430 |
| O | 1.9447469200  | 14.7050265750 | 11.8997853260 |
| O | 3.8623944650  | 6.2288552660  | 11.9298061450 |
| O | 0.0188140770  | 6.2325595920  | 11.9246180580 |
| O | -0.0489590140 | 8.8814569880  | 12.5653174590 |
| O | 5.8346431220  | 0.3951316370  | 12.5873248940 |
| O | 1.9449969400  | 0.4126786570  | 12.5974693210 |
| O | 3.9212318270  | 8.8797702680  | 12.5599445850 |
| O | 3.8869804060  | 11.8683664210 | 13.2922705530 |
| O | -0.0041093520 | 11.8683733420 | 13.2937868030 |
| O | 5.8348169150  | 3.3461208670  | 13.3056601630 |
| O | 1.9505053350  | 3.3795635200  | 13.2870608340 |
| O | -0.0009639370 | 14.5093743570 | 13.8347375190 |
| O | 3.8918264490  | 14.5091269780 | 13.8350426310 |
| O | 5.8281171280  | 5.9823802100  | 13.8311618500 |
| O | 1.9292645860  | 5.9339653850  | 13.8900682500 |
| O | 1.7575268080  | 8.2482198780  | 14.8108390940 |
| O | 2.9080902460  | 8.5319335960  | 15.5093480360 |
| H | 2.6382704740  | 8.3638942370  | 16.4390003910 |

### 331-Ce2-HOOH

|    |               |               |              |
|----|---------------|---------------|--------------|
| Ce | -0.0000000020 | 6.9507133630  | 2.3670970170 |
| Ce | 3.8891956530  | 6.9507207260  | 2.3670759380 |
| Ce | 1.9445977200  | 15.4270460790 | 2.3670955860 |
| Ce | -1.9445979550 | 15.4270460790 | 2.3670955860 |
| Ce | -0.0000000020 | 12.4228856140 | 3.5203780730 |



|    |               |               |               |
|----|---------------|---------------|---------------|
| Ce | 3.8891961160  | 12.4228886680 | 3.5203753370  |
| Ce | 1.9445982560  | 3.9465691430  | 3.5203870530  |
| Ce | 5.8337936290  | 3.9465691430  | 3.5203870530  |
| Ce | -1.9445991460 | 9.3609901900  | 4.5898474610  |
| Ce | 1.9445994620  | 9.3609901900  | 4.5898474610  |
| Ce | -0.0000000020 | 0.8846764880  | 4.5898703710  |
| Ce | 3.8891960310  | 0.8846819140  | 4.5898688270  |
| Ce | 1.9445974610  | 14.7231392280 | 6.0359420990  |
| Ce | -1.9445975780 | 14.7231392280 | 6.0359420990  |
| Ce | 3.8891960020  | 6.2468290920  | 6.0359347630  |
| Ce | -0.0000000000 | 6.2468342360  | 6.0359376290  |
| Ce | 3.8891958870  | 11.5628706430 | 7.2731916820  |
| Ce | 0.0000000000  | 11.5628681570 | 7.2731922510  |
| Ce | 5.8337918010  | 3.0865645100  | 7.2732007650  |
| Ce | 1.9446000880  | 3.0865645100  | 7.2732007650  |
| Ce | -1.9461030080 | 8.5138222370  | 8.4973090920  |
| Ce | 1.9450844140  | 8.5104161150  | 8.5054291260  |
| Ce | 0.0001679450  | 0.0393347080  | 8.5001887070  |
| Ce | 3.8895975380  | 0.0399282840  | 8.4995642290  |
| Ce | 1.9452760500  | 13.8356092340 | 9.7364119610  |
| Ce | 3.8837555710  | 5.3628304310  | 9.7439957470  |
| Ce | -1.9431654250 | 13.8387067610 | 9.7353336720  |
| Ce | 0.0042015280  | 5.3575756150  | 9.7419922080  |
| Ce | -0.0024042300 | 10.7262784990 | 11.1653246020 |
| Ce | 1.9463618690  | 2.2459655840  | 11.1827691680 |
| Ce | 3.9016176500  | 10.7346200750 | 11.1656792270 |
| Ce | 5.8367354910  | 2.2394615430  | 11.1775355560 |
| Ce | 3.8884042600  | 16.1324189530 | 12.2539661900 |
| Ce | 1.9157162180  | 7.6770162560  | 12.2880234820 |
| Ce | -0.0017635820 | 16.1336297060 | 12.2557052270 |
| Ce | 5.8351407870  | 7.6599299660  | 12.2436988590 |
| Ce | 1.9460781400  | 13.1168519340 | 13.4043862150 |
| Ce | -1.9407449020 | 13.1318017070 | 13.4053308230 |
| Ce | -0.0122388160 | 4.6447011600  | 13.4200050040 |
| Ce | 3.9067401080  | 4.6419630120  | 13.4096523640 |
| O  | 1.9445887870  | 5.5490558700  | 1.9335942950  |
| O  | 3.8891958830  | 14.0253876620 | 1.9336029210  |
| O  | -0.0000000030 | 14.0253887860 | 1.9336008020  |
| O  | 5.8338029790  | 5.5490558700  | 1.9335942950  |
| O  | 1.9445908170  | 8.1935857730  | 2.4635064340  |
| O  | 5.8338009510  | 8.1935857730  | 2.4635064340  |
| O  | -0.0000000030 | 16.6699198080 | 2.4635100400  |
| O  | 3.8891958840  | 16.6699191890 | 2.4635187780  |
| O  | 1.9445985820  | 11.1825729010 | 3.1763256020  |
| O  | -1.9445985870 | 11.1825729010 | 3.1763256020  |
| O  | 3.8891958840  | 2.7062566780  | 3.1763346120  |
| O  | -0.0000000030 | 2.7062551340  | 3.1763349690  |
| O  | 1.9445949560  | 13.8336284430 | 3.8696194020  |

|   |               |               |               |
|---|---------------|---------------|---------------|
| O | -1.9445949580 | 13.8336284430 | 3.8696194020  |
| O | 3.8891958860  | 5.3573044120  | 3.8696200540  |
| O | -0.0000000010 | 5.3573111040  | 3.8696153590  |
| O | 1.9445953790  | 16.4701576290 | 4.3638358960  |
| O | -1.9445952660 | 16.4701576290 | 4.3638358960  |
| O | 3.8891957690  | 7.9938543410  | 4.3638299020  |
| O | -0.0000000020 | 7.9938460830  | 4.3638247910  |
| O | 5.8337950840  | 2.1685343300  | 5.0305281930  |
| O | 1.9445964570  | 2.1685343300  | 5.0305281930  |
| O | -0.0000000010 | 10.6448420120 | 5.0305093800  |
| O | 3.8891958860  | 10.6448400810 | 5.0305102620  |
| O | 1.9446010490  | 4.8520739810  | 5.6962716020  |
| O | 5.8337907230  | 4.8520739810  | 5.6962716020  |
| O | 3.8891956540  | 13.3283842090 | 5.6962689610  |
| O | -0.0000000020 | 13.3283816710 | 5.6962746390  |
| O | 3.8891956540  | 16.0624346680 | 6.2752528180  |
| O | -0.0000000000 | 16.0624317930 | 6.2752523580  |
| O | 5.8337916220  | 7.5861299260  | 6.2752432660  |
| O | 1.9446001510  | 7.5861299260  | 6.2752432660  |
| O | 1.9445965700  | 10.2543739410 | 6.9222146910  |
| O | -1.9445968610 | 10.2543739410 | 6.9222146910  |
| O | 3.8891957130  | 1.7780622010  | 6.9222298330  |
| O | -0.0000000000 | 1.7780609630  | 6.9222314740  |
| O | 1.9445987410  | 12.9360348810 | 7.5912439110  |
| O | -1.9445989730 | 12.9360348810 | 7.5912439110  |
| O | 3.8891956550  | 4.4597271670  | 7.5912502650  |
| O | 0.0000000000  | 4.4597250260  | 7.5912453510  |
| O | 3.8953537770  | 7.1396312030  | 8.1871427450  |
| O | 1.9442405260  | 15.6170429790 | 8.1824438670  |
| O | -1.9443995440 | 15.6201552610 | 8.1830869220  |
| O | -0.0070912560 | 7.1400378020  | 8.1848039850  |
| O | 3.8795363170  | 9.8259348500  | 8.8448815220  |
| O | 0.0089004810  | 9.8232058490  | 8.8588809010  |
| O | 5.8340326340  | 1.3485149650  | 8.8534245850  |
| O | 1.9459198570  | 1.3529844800  | 8.8515052040  |
| O | 3.8943764840  | 12.4990682680 | 9.4940618020  |
| O | -0.0005101320 | 12.4979384950 | 9.4911310380  |
| O | 1.9445175320  | 4.0202779630  | 9.5037130000  |
| O | 5.8364326570  | 4.0216209450  | 9.4952625960  |
| O | -0.0003936420 | 15.2306696710 | 10.0791464410 |
| O | 5.8324258020  | 6.7463081410  | 10.0933508300 |
| O | 1.9401282870  | 6.7545908730  | 10.0702504370 |
| O | 3.8872417150  | 15.2303279040 | 10.0794655530 |
| O | 1.9633390720  | 9.4201303950  | 10.7735554010 |
| O | 3.8887874480  | 0.9612536740  | 10.7430509780 |
| O | 0.0037132090  | 0.9580707460  | 10.7404003390 |
| O | -1.9571658570 | 9.4393678720  | 10.7100684180 |
| O | 3.9009440220  | 3.6184521690  | 11.4067054140 |

|   |               |               |               |
|---|---------------|---------------|---------------|
| O | -0.0054836470 | 3.6074849350  | 11.4150484850 |
| O | 1.9488643450  | 12.0838448840 | 11.3915617870 |
| O | -1.9400829970 | 12.0921604320 | 11.3983821260 |
| O | -1.9466737510 | 14.7283921110 | 11.9021940720 |
| O | 1.9417800830  | 14.7187129650 | 11.9071584310 |
| O | 3.8487239640  | 6.2648179400  | 11.9291234900 |
| O | 0.0284954070  | 6.2450332280  | 11.9206164020 |
| O | -0.0403416530 | 8.8981856160  | 12.5521733700 |
| O | 5.8361848430  | 0.4172372450  | 12.5928519230 |
| O | 1.9453180590  | 0.4307027070  | 12.6024729930 |
| O | 3.9619386220  | 8.9319366360  | 12.6426572970 |
| O | 3.8929321620  | 11.8826971290 | 13.2858543110 |
| O | 0.0042289730  | 11.8933420400 | 13.2774867250 |
| O | 5.8296921670  | 3.3876319520  | 13.3172173090 |
| O | 1.9566312670  | 3.4303182430  | 13.2984914770 |
| O | -0.0140996430 | 14.5281634010 | 13.8384689680 |
| O | 3.8909800470  | 14.5208886380 | 13.8351945770 |
| O | 5.8358082640  | 6.0166840070  | 13.8178044320 |
| O | 1.9144819940  | 6.0648566590  | 13.9333945860 |
| O | 2.3377056870  | 8.9317954460  | 14.6983084710 |
| O | 2.6237792950  | 7.9112042260  | 15.7089031890 |
| H | 2.2966908220  | 7.0989788860  | 15.2001335360 |
| H | 3.2298250030  | 9.0908811330  | 14.2708988720 |
