# Supplementary figures and images for: Assessing the oxygen reduction reaction by a 2-electron mechanism on ceria surfaces
Source: Royal Society of Chemistry journal article supplement (doi:10.1039/d1cp03007h), 2021-01-01

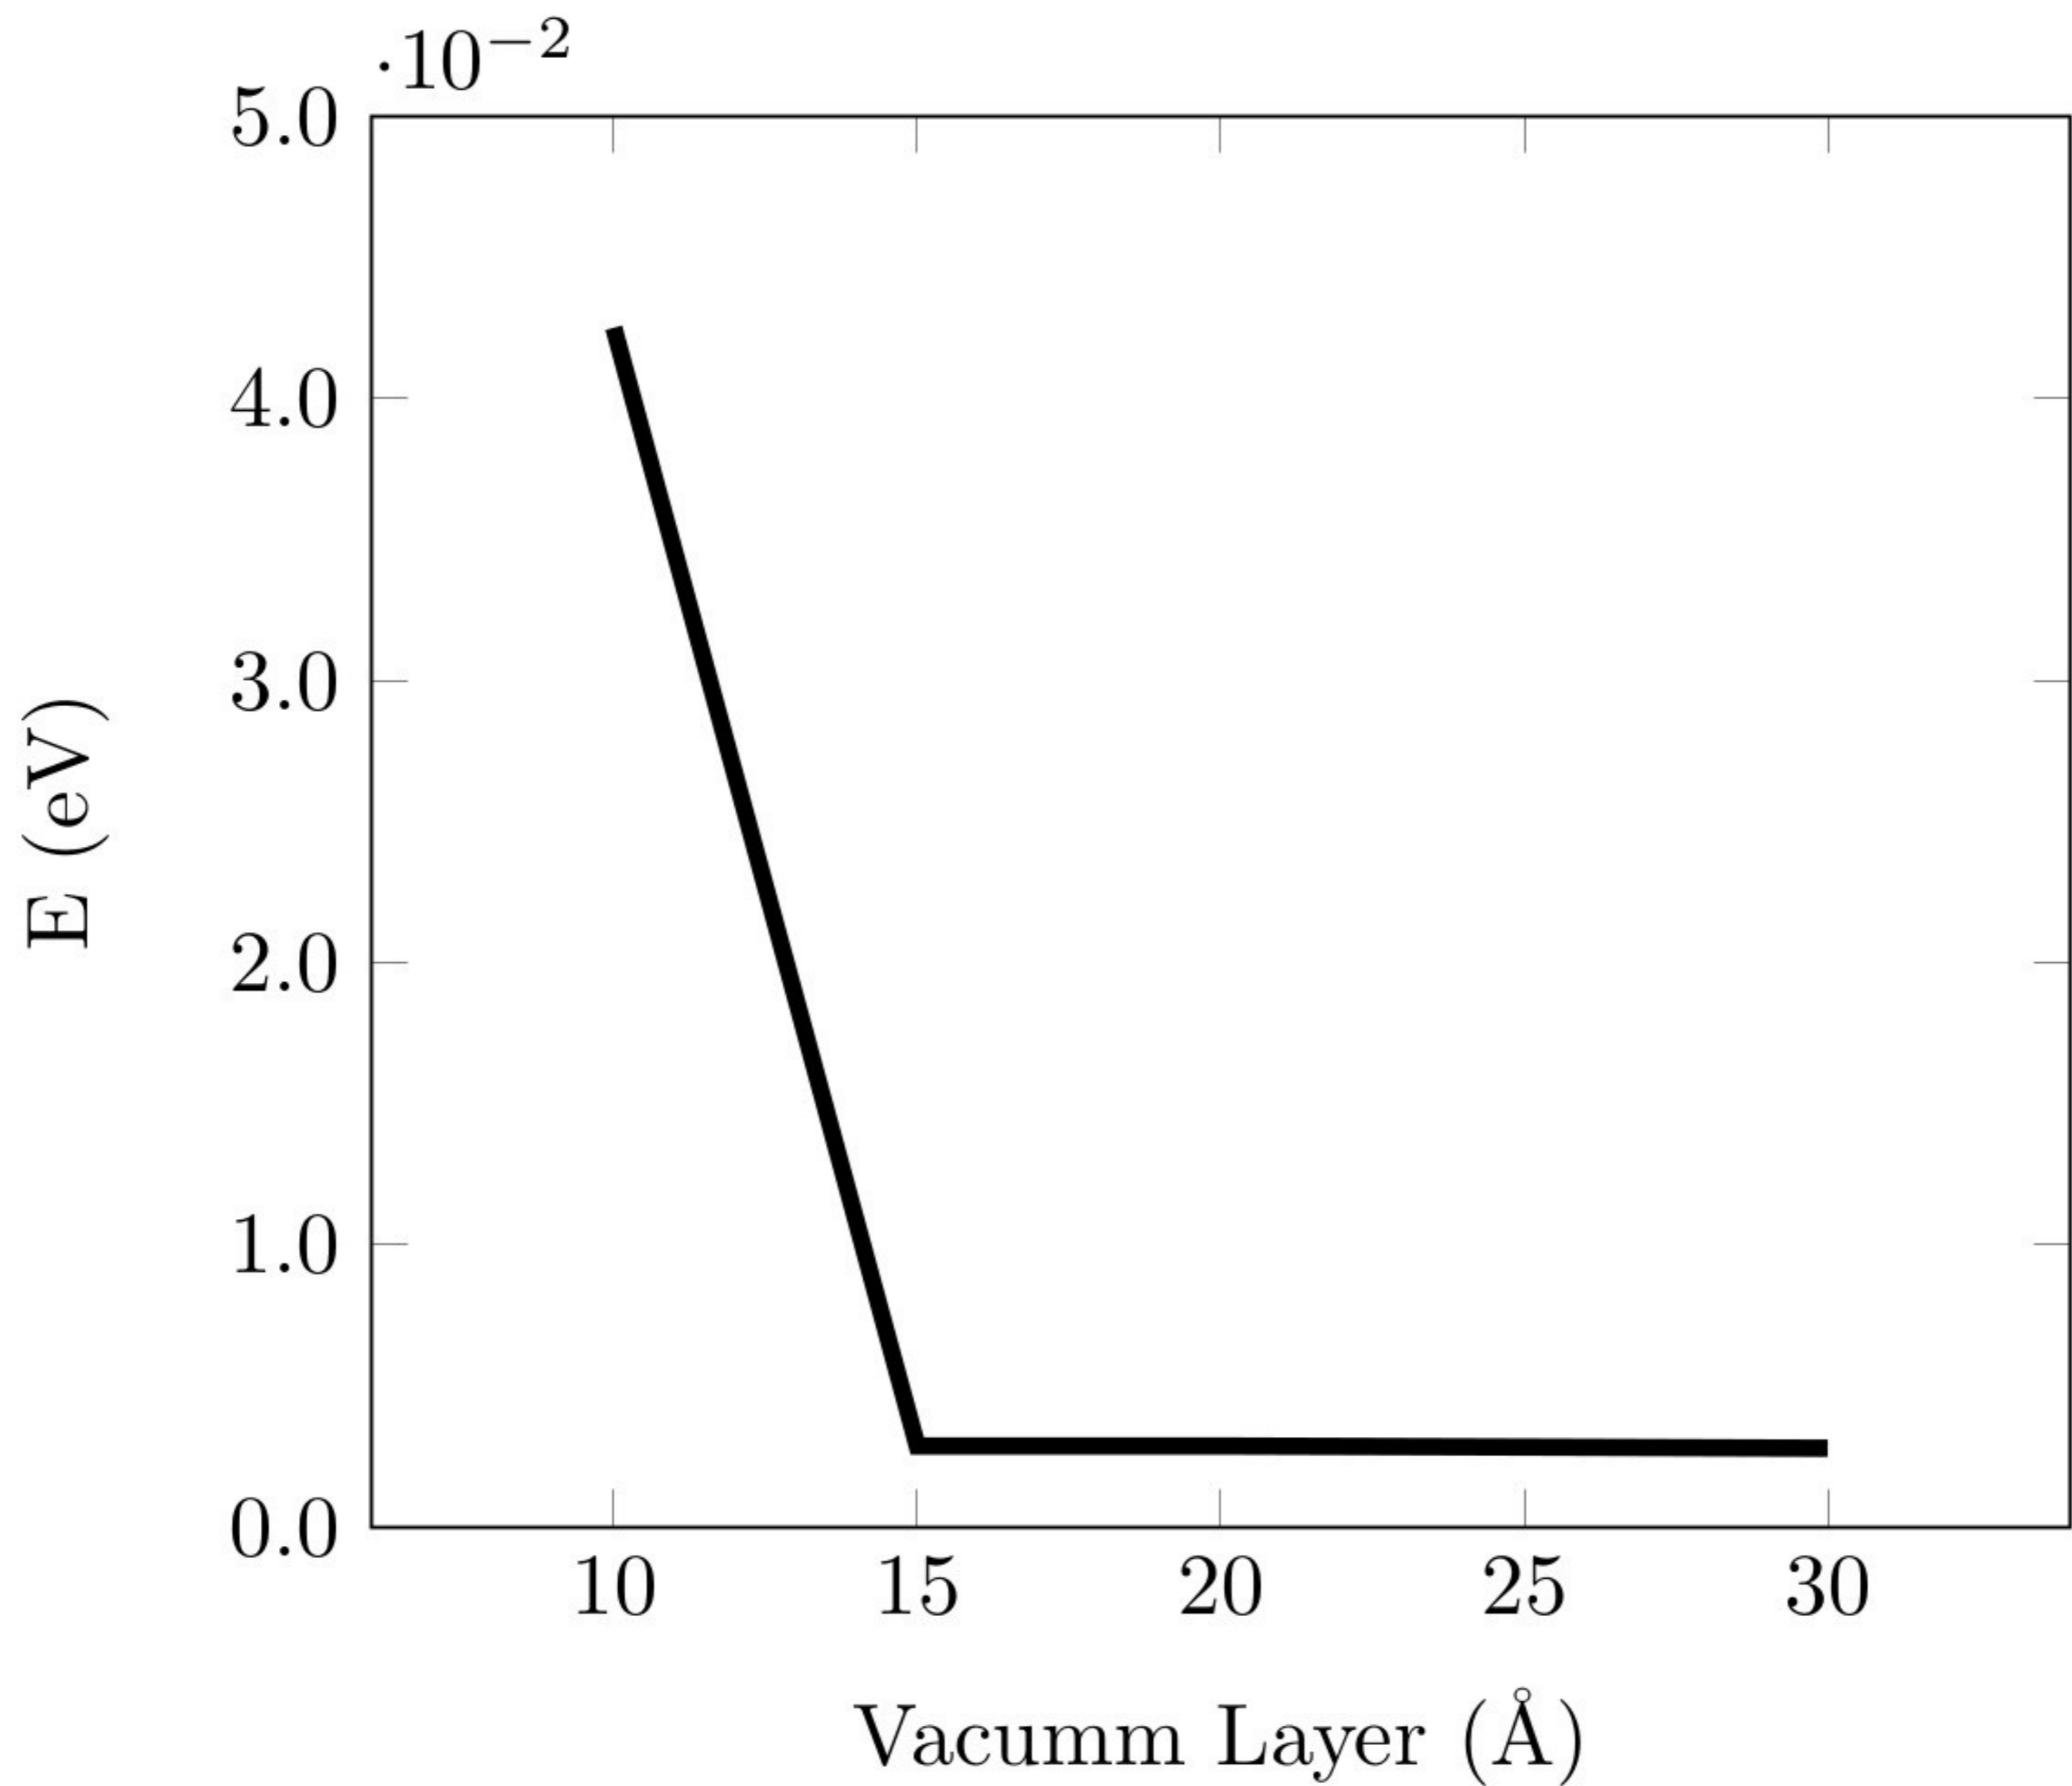

Supplement: d1cp03007h2.pdf [file d1cp03007h2.pdf]

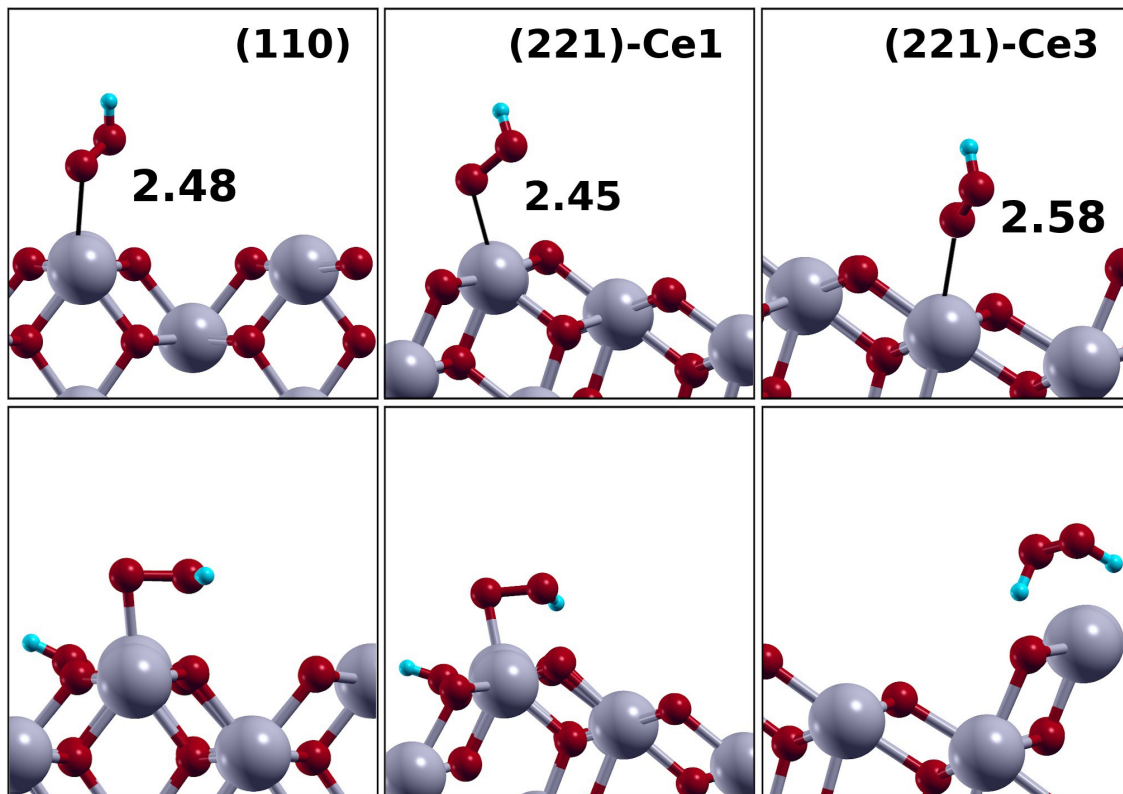

Supplement: d1cp03007h3.pdf [file d1cp03007h3.pdf]

CeO<sub>2</sub> spin up ————  
CeO<sub>2</sub> spin down ————  
Molecule spin up x10 ······  
Molecule spin down x10 ······

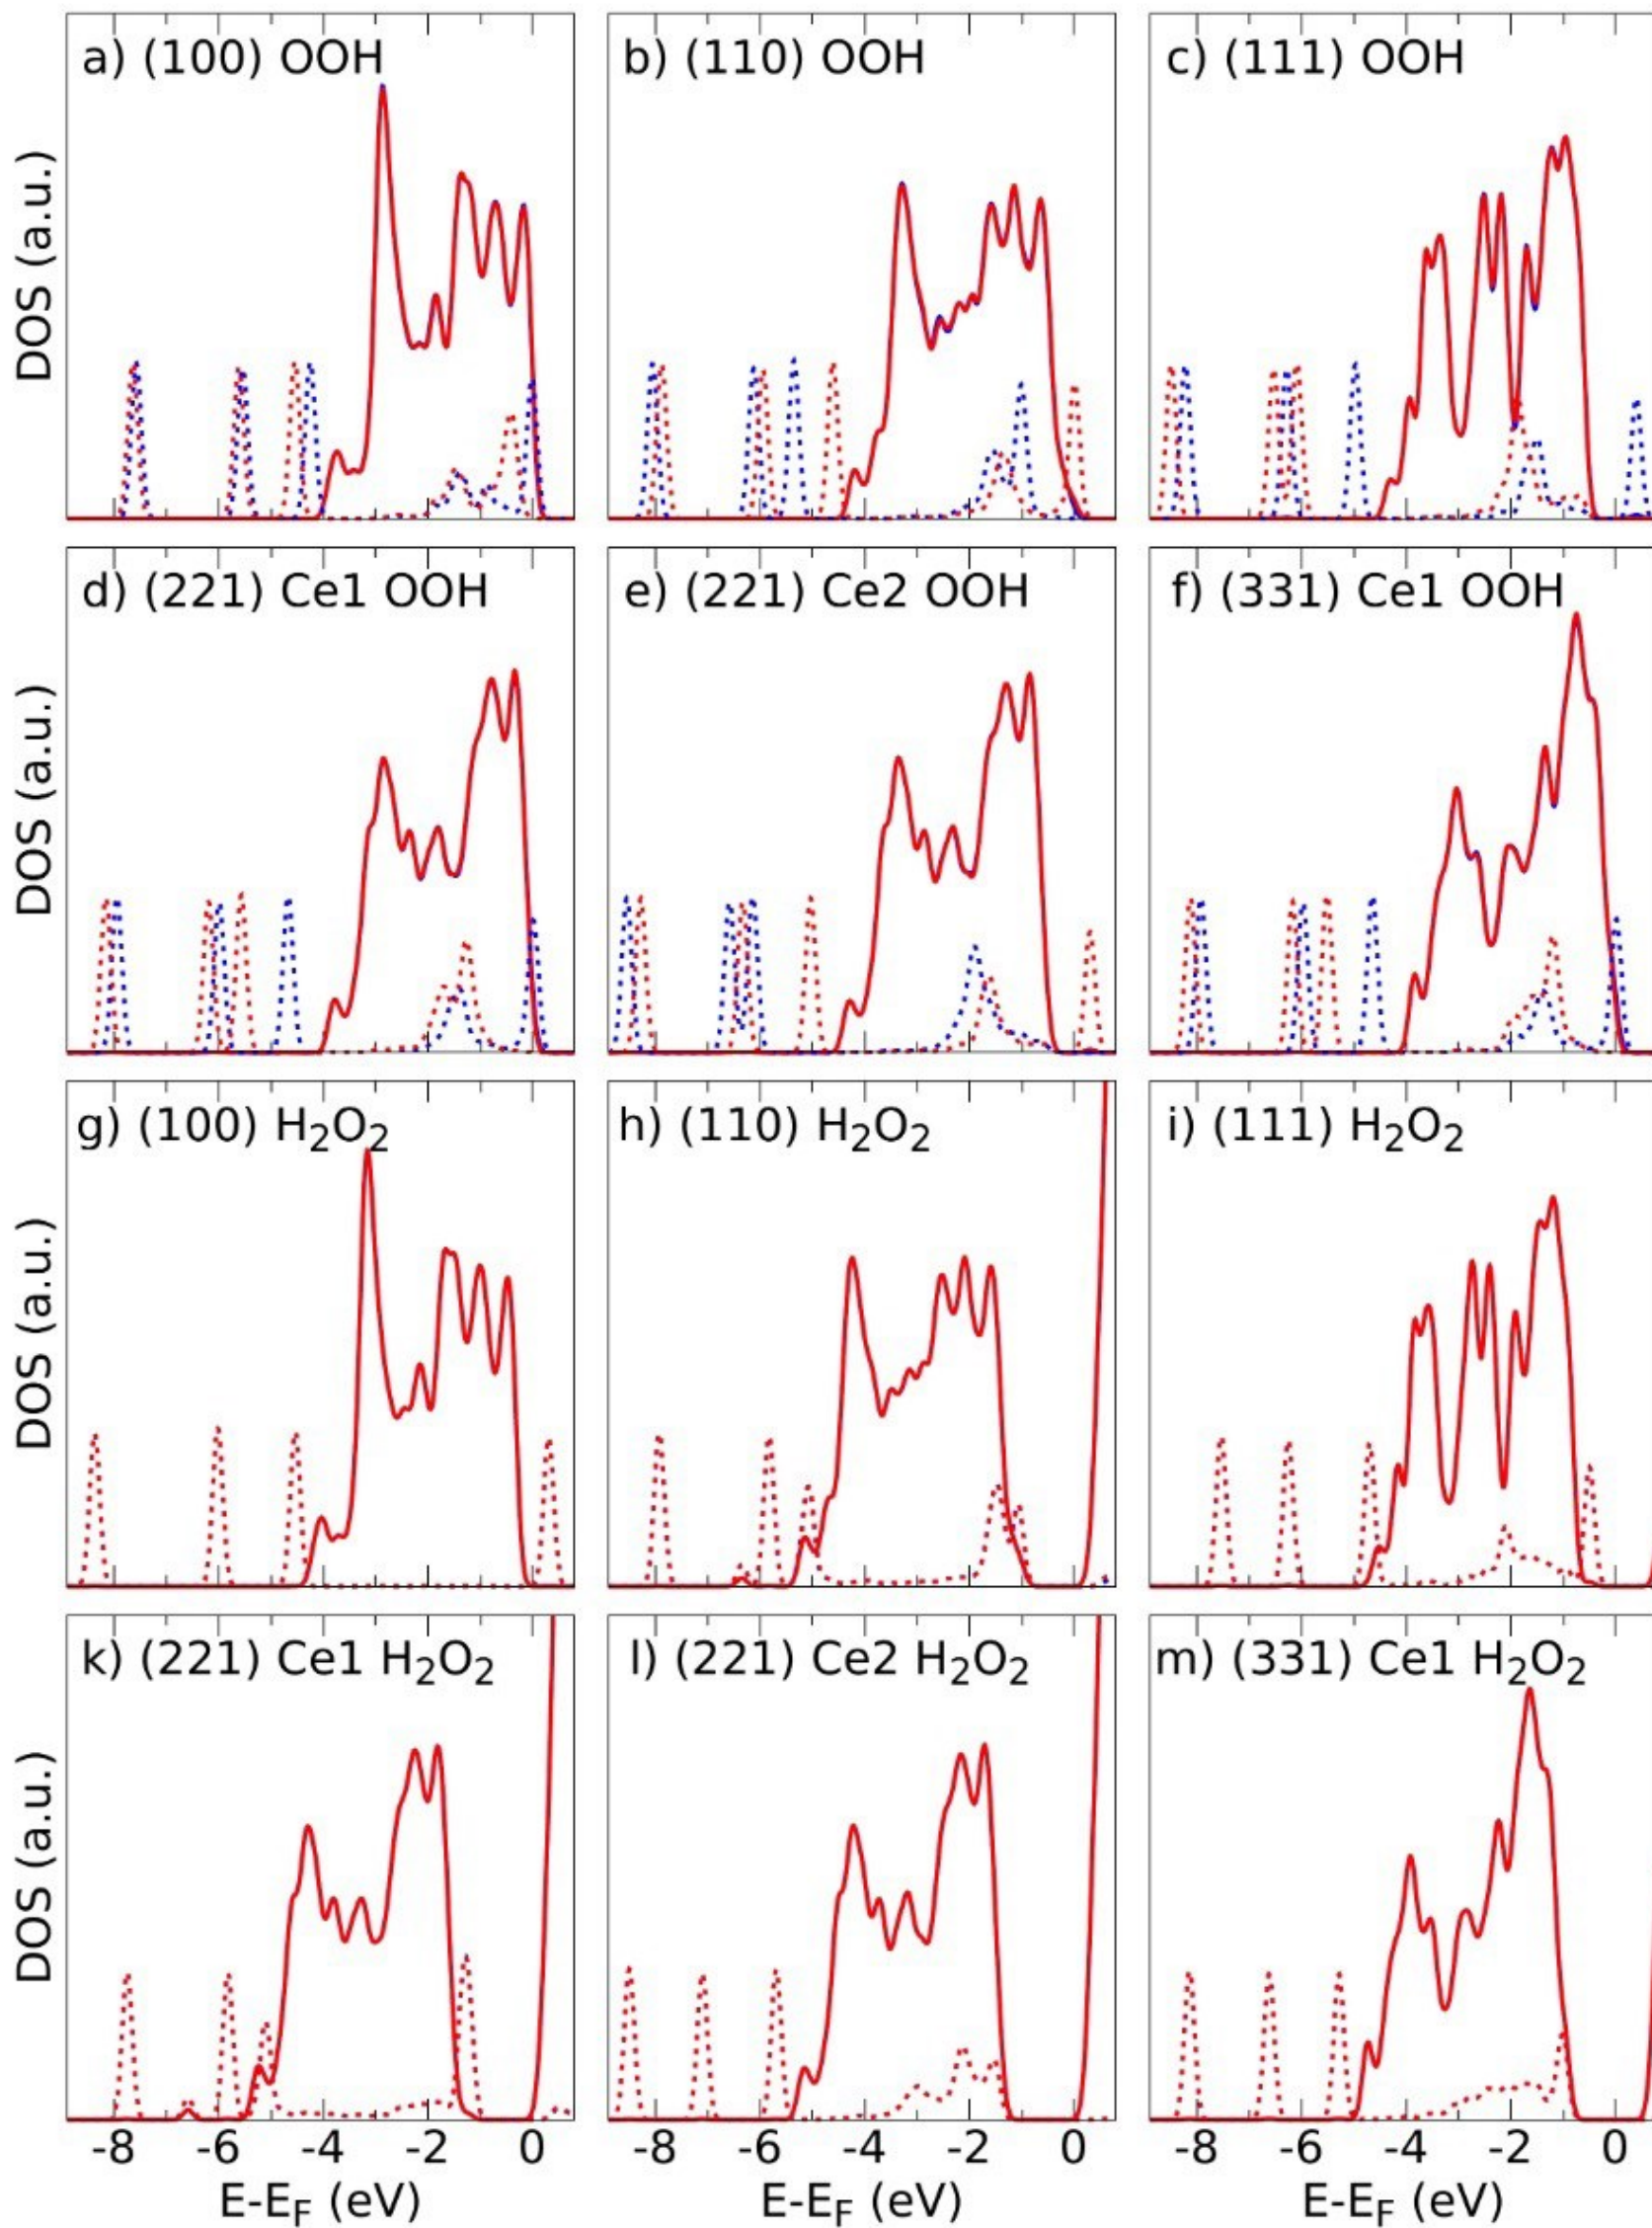

Supplement: d1cp03007h4.pdf [file d1cp03007h4.pdf]
